# Supplementary material for: The Complete Genome Sequence and Structure of the Oleaginous Rhodococcus opacus Strain PD630 Through Nanopore Technology
Source: Front Bioeng Biotechnol. 2022 Feb 17;9:810571. doi: 10.3389/fbioe.2021.810571 (PMC8892189; doi:10.3389/fbioe.2021.810571)
Supplement: Supplementary file 2 [file DataSheet1.XLSX]

## Sheet: Table S2
Table S1 KEGG Orthology (KO) functional annotation of protein coding genes carried by plasmids in Rhodococcus opacus strains and R. jostii RHA1
Rhodococcus strain	Plasmid	RefSeq locus tag	KO	E-value	KO definition
Rhodococcus opacus B4	pKNR	ROP_RS39800	K03496	4.4e-50	chromosome partitioning protein
Rhodococcus opacus B4	pKNR	ROP_RS39885	K07344	1.9e-24	type IV secretion system protein TrbL
Rhodococcus opacus B4	pKNR	ROP_RS39920	K03205	1.4e-63	type IV secretion system protein VirD4 [EC:7.4.2.8]
Rhodococcus opacus B4	pKNR	ROP_RS43355	K07052	3.6e-15	CAAX protease family protein
Rhodococcus opacus B4	pKNR	ROP_RS39970	K03497	6.3e-23	ParB family transcriptional regulator, chromosome partitioning protein
Rhodococcus opacus B4	pKNR	ROP_RS39980	K07497	1.2e-25	putative transposase
Rhodococcus opacus B4	pKNR	ROP_RS40055	K06191	1.4e-33	glutaredoxin-like protein NrdH
Rhodococcus opacus B4	pKNR	ROP_RS40090	K13640	1.4e-36	MerR family transcriptional regulator, heat shock protein HspR
Rhodococcus opacus B4	pKNR	ROP_RS40095	K13993	2.1e-34	HSP20 family protein
Rhodococcus opacus B4	pKNR	ROP_RS40110	K02039	1.7e-52	phosphate transport system protein
Rhodococcus opacus B4	pKNR	ROP_RS40115	K14060	1.3e-47	putative DNA-invertase from lambdoid prophage Rac
Rhodococcus opacus B4	pKNR	ROP_RS40150	K00012	6.9e-189	UDPglucose 6-dehydrogenase [EC:1.1.1.22]
Rhodococcus opacus B4	pKNR	ROP_RS40155	K02377	1.6e-149	GDP-L-fucose synthase [EC:1.1.1.271]
Rhodococcus opacus B4	pKNR	ROP_RS40160	K01711	2.2e-174	GDPmannose 4,6-dehydratase [EC:4.2.1.47]
Rhodococcus opacus B4	pKNR	ROP_RS40165	K05946	3.4e-69	N-acetylglucosaminyldiphosphoundecaprenol N-acetyl-beta-D-mannosaminyltransferase [EC:2.4.1.187]
Rhodococcus opacus B4	pKNR	ROP_RS40195	K16566	3.9e-73	exopolysaccharide production protein ExoY
Rhodococcus opacus B4	pKNR	ROP_RS40205	K00661	4.1e-45	maltose O-acetyltransferase [EC:2.3.1.79]
Rhodococcus opacus B4	pKNR	ROP_RS40210	K16568	1.2e-46	exopolysaccharide production protein ExoZ
Rhodococcus opacus B4	pROB01	ROP_RS35985	K07497	5.4e-39	putative transposase
Rhodococcus opacus B4	pROB01	ROP_RS35985	K07483	2.2e-19	transposase
Rhodococcus opacus B4	pROB01	ROP_RS41750	K07496	2.1e-99	putative transposase
Rhodococcus opacus B4	pROB01	ROP_RS36045	K03496	1e-43	chromosome partitioning protein
Rhodococcus opacus B4	pROB01	ROP_RS36130	K03466	1.2e-19	DNA segregation ATPase FtsK/SpoIIIE, S-DNA-T family
Rhodococcus opacus B4	pROB01	ROP_RS42905	K07497	2.2e-15	putative transposase
Rhodococcus opacus B4	pROB01	ROP_RS36140	K07482	1.6e-124	transposase, IS30 family
Rhodococcus opacus B4	pROB01	ROP_RS36140	K07497	3.6e-11	putative transposase
Rhodococcus opacus B4	pROB01	ROP_RS41780	K07483	8.6e-21	transposase
Rhodococcus opacus B4	pROB01	ROP_RS36200	K07482	1.7e-122	transposase, IS30 family
Rhodococcus opacus B4	pROB01	ROP_RS41790	K07497	4.2e-25	putative transposase
Rhodococcus opacus B4	pROB01	ROP_RS36205	K07483	3.7e-19	transposase
Rhodococcus opacus B4	pROB01	ROP_RS36210	K01055	4.2e-60	3-oxoadipate enol-lactonase [EC:3.1.1.24]
Rhodococcus opacus B4	pROB01	ROP_RS36290	K07052	1.4e-11	CAAX protease family protein
Rhodococcus opacus B4	pROB01	ROP_RS36400	K18955	3.4e-32	WhiB family transcriptional regulator, redox-sensing transcriptional regulator
Rhodococcus opacus B4	pROB01	ROP_RS41815	K07492	4.3e-31	putative transposase
Rhodococcus opacus B4	pROB01	ROP_RS36520	K07497	4.2e-22	putative transposase
Rhodococcus opacus B4	pROB01	ROP_RS41830	K07492	1.8e-56	putative transposase
Rhodococcus opacus B4	pROB01	ROP_RS41835	K07492	4.3e-31	putative transposase
Rhodococcus opacus B4	pROB01	ROP_RS36640	K07482	4.5e-55	transposase, IS30 family
Rhodococcus opacus B4	pROB01	ROP_RS36645	K00986	1.2e-31	RNA-directed DNA polymerase [EC:2.7.7.49]
Rhodococcus opacus B4	pROB01	ROP_RS41840	K07483	8.6e-21	transposase
Rhodococcus opacus B4	pROB01	ROP_RS42920	K07497	1.6e-10	putative transposase
Rhodococcus opacus B4	pROB01	ROP_RS36665	K07482	1.7e-122	transposase, IS30 family
Rhodococcus opacus B4	pROB01	ROP_RS41850	K07497	4.4e-15	putative transposase
Rhodococcus opacus B4	pROB01	ROP_RS36690	K07497	3e-09	putative transposase
Rhodococcus opacus B4	pROB01	ROP_RS36695	K07497	9.6e-13	putative transposase
Rhodococcus opacus B4	pROB01	ROP_RS36735	K03975	4.9e-88	membrane-associated protein
Rhodococcus opacus B4	pROB01	ROP_RS41895	K07497	4.4e-15	putative transposase
Rhodococcus opacus B4	pROB01	ROP_RS36740	K07482	1.7e-122	transposase, IS30 family
Rhodococcus opacus B4	pROB01	ROP_RS42935	K07497	1.2e-09	putative transposase
Rhodococcus opacus B4	pROB01	ROP_RS41905	K07483	6.5e-21	transposase
Rhodococcus opacus B4	pROB01	ROP_RS36775	K06199	2.5e-25	fluoride exporter
Rhodococcus opacus B4	pROB01	ROP_RS36780	K06199	2.2e-27	fluoride exporter
Rhodococcus opacus B4	pROB01	ROP_RS36785	K13292	3.3e-72	phosphatidylglycerol---prolipoprotein diacylglyceryl transferase [EC:2.5.1.145]
Rhodococcus opacus B4	pROB01	ROP_RS36790	K02484	4.8e-97	two-component system, OmpR family, sensor kinase [EC:2.7.13.3]
Rhodococcus opacus B4	pROB01	ROP_RS36820	K19302	1.9e-28	undecaprenyl-diphosphatase [EC:3.6.1.27]
Rhodococcus opacus B4	pROB01	ROP_RS36825	K02483	6.7e-75	two-component system, OmpR family, response regulator
Rhodococcus opacus B4	pROB01	ROP_RS36895	K08995	2.2e-23	putative membrane protein
Rhodococcus opacus B4	pROB01	ROP_RS36915	K22552	4.5e-216	multicopper oxidase [EC:1.16.3.1]
Rhodococcus opacus B4	pROB01	ROP_RS36920	K08162	3.5e-80	MFS transporter, DHA1 family, multidrug resistance protein
Rhodococcus opacus B4	pROB01	ROP_RS36925	K22847	2.6e-195	S-sulfo-L-cysteine synthase (3-phospho-L-serine-dependent) [EC:2.8.5.1]
Rhodococcus opacus B4	pROB01	ROP_RS36930	K21608	2.4e-23	lipoprotein LpqS
Rhodococcus opacus B4	pROB01	ROP_RS36940	K02171	3.7e-18	BlaI family transcriptional regulator, penicillinase repressor
Rhodococcus opacus B4	pROB01	ROP_RS36945	K02199	6.7e-28	cytochrome c biogenesis protein CcmG, thiol:disulfide interchange protein DsbE
Rhodococcus opacus B4	pROB01	ROP_RS36950	K02199	2.8e-28	cytochrome c biogenesis protein CcmG, thiol:disulfide interchange protein DsbE
Rhodococcus opacus B4	pROB01	ROP_RS36955	K06196	5.1e-67	cytochrome c-type biogenesis protein
Rhodococcus opacus B4	pROB01	ROP_RS37015	K01533	1.8e-287	P-type Cu2+ transporter [EC:7.2.2.9]
Rhodococcus opacus B4	pROB01	ROP_RS37015	K17686	7.7e-282	P-type Cu+ transporter [EC:7.2.2.8]
Rhodococcus opacus B4	pROB01	ROP_RS37020	K08995	3.9e-13	putative membrane protein
Rhodococcus opacus B4	pROB01	ROP_RS37025	K07213	1.5e-20	copper chaperone
Rhodococcus opacus B4	pROB01	ROP_RS37035	K02483	2.5e-76	two-component system, OmpR family, response regulator
Rhodococcus opacus B4	pROB01	ROP_RS37040	K08982	3.4e-21	putative membrane protein
Rhodococcus opacus B4	pROB01	ROP_RS37045	K21600	2.2e-39	CsoR family transcriptional regulator, copper-sensing transcriptional repressor
Rhodococcus opacus B4	pROB01	ROP_RS37050	K17686	2.8e-304	P-type Cu+ transporter [EC:7.2.2.8]
Rhodococcus opacus B4	pROB01	ROP_RS37050	K01533	1.1e-263	P-type Cu2+ transporter [EC:7.2.2.9]
Rhodococcus opacus B4	pROB01	ROP_RS37060	K07213	6.9e-22	copper chaperone
Rhodococcus opacus B4	pROB01	ROP_RS37075	K07486	8.9e-59	transposase
Rhodococcus opacus B4	pROB01	ROP_RS37080	K01113	5.1e-126	alkaline phosphatase D [EC:3.1.3.1]
Rhodococcus opacus B4	pROB01	ROP_RS37105	K01990	1.3e-91	ABC-2 type transport system ATP-binding protein
Rhodococcus opacus B4	pROB01	ROP_RS37115	K03088	3.3e-30	RNA polymerase sigma-70 factor, ECF subfamily
Rhodococcus opacus B4	pROB01	ROP_RS37120	K07492	4e-48	putative transposase
Rhodococcus opacus B4	pROB01	ROP_RS37135	K12954	0	cation-transporting P-type ATPase G [EC:7.2.2.-]
Rhodococcus opacus B4	pROB01	ROP_RS37140	K21903	2.1e-35	ArsR family transcriptional regulator, lead/cadmium/zinc/bismuth-responsive transcriptional repressor
Rhodococcus opacus B4	pROB01	ROP_RS37150	K21885	1.4e-50	ArsR family transcriptional regulator, cadmium/lead-responsive transcriptional repressor
Rhodococcus opacus B4	pROB01	ROP_RS37170	K16264	2.1e-110	cobalt-zinc-cadmium efflux system protein
Rhodococcus opacus B4	pROB01	ROP_RS37205	K07225	2e-24	putative hemin transport protein
Rhodococcus opacus B4	pROB01	ROP_RS37210	K02011	1e-110	iron(III) transport system permease protein
Rhodococcus opacus B4	pROB01	ROP_RS37215	K02012	6.2e-75	iron(III) transport system substrate-binding protein
Rhodococcus opacus B4	pROB01	ROP_RS37230	K02171	4.8e-22	BlaI family transcriptional regulator, penicillinase repressor
Rhodococcus opacus B4	pROB01	ROP_RS37240	K02274	7.1e-279	cytochrome c oxidase subunit I [EC:7.1.1.9]
Rhodococcus opacus B4	pROB01	ROP_RS37255	K06994	2.1e-195	putative drug exporter of the RND superfamily
Rhodococcus opacus B4	pROB01	ROP_RS37260	K01673	1.4e-59	carbonic anhydrase [EC:4.2.1.1]
Rhodococcus opacus B4	pROB01	ROP_RS37265	K07238	2.5e-35	zinc transporter, ZIP family
Rhodococcus opacus B4	pROB01	ROP_RS37270	K00368	1.1e-65	nitrite reductase (NO-forming) [EC:1.7.2.1]
Rhodococcus opacus B4	pROB01	ROP_RS37275	K03709	1.1e-57	DtxR family transcriptional regulator, Mn-dependent transcriptional regulator
Rhodococcus opacus B4	pROB01	ROP_RS37290	K07156	9e-46	copper resistance protein C
Rhodococcus opacus B4	pROB01	ROP_RS37295	K02351	1e-68	putative membrane protein
Rhodococcus opacus B4	pROB01	ROP_RS37300	K08995	6.5e-11	putative membrane protein
Rhodococcus opacus B4	pROB01	ROP_RS37310	K06196	1.9e-68	cytochrome c-type biogenesis protein
Rhodococcus opacus B4	pROB01	ROP_RS37315	K02199	4.6e-30	cytochrome c biogenesis protein CcmG, thiol:disulfide interchange protein DsbE
Rhodococcus opacus B4	pROB01	ROP_RS37320	K02199	1.3e-25	cytochrome c biogenesis protein CcmG, thiol:disulfide interchange protein DsbE
Rhodococcus opacus B4	pROB01	ROP_RS37360	K01744	5.1e-244	aspartate ammonia-lyase [EC:4.3.1.1]
Rhodococcus opacus B4	pROB01	ROP_RS37370	K02032	1.1e-132	peptide/nickel transport system ATP-binding protein
Rhodococcus opacus B4	pROB01	ROP_RS37375	K02031	2.6e-128	peptide/nickel transport system ATP-binding protein
Rhodococcus opacus B4	pROB01	ROP_RS37385	K02034	4.8e-97	peptide/nickel transport system permease protein
Rhodococcus opacus B4	pROB01	ROP_RS37395	K09471	5.2e-133	gamma-glutamylputrescine oxidase [EC:1.4.3.-]
Rhodococcus opacus B4	pROB01	ROP_RS37400	K01560	3.1e-53	2-haloacid dehalogenase [EC:3.8.1.2]
Rhodococcus opacus B4	pROB01	ROP_RS37405	K02035	1.4e-93	peptide/nickel transport system substrate-binding protein
Rhodococcus opacus B4	pROB01	ROP_RS37430	K00135	2.6e-201	succinate-semialdehyde dehydrogenase / glutarate-semialdehyde dehydrogenase [EC:1.2.1.16 1.2.1.79 1.2.1.20]
Rhodococcus opacus B4	pROB01	ROP_RS37440	K12940	2.4e-150	aminobenzoyl-glutamate utilization protein A
Rhodococcus opacus B4	pROB01	ROP_RS37480	K01069	1.3e-37	hydroxyacylglutathione hydrolase [EC:3.1.2.6]
Rhodococcus opacus B4	pROB01	ROP_RS37495	K01069	1.9e-41	hydroxyacylglutathione hydrolase [EC:3.1.2.6]
Rhodococcus opacus B4	pROB01	ROP_RS37500	K07090	3.6e-47	uncharacterized protein
Rhodococcus opacus B4	pROB01	ROP_RS37520	K06994	2e-177	putative drug exporter of the RND superfamily
Rhodococcus opacus B4	pROB01	ROP_RS37525	K01069	2.4e-51	hydroxyacylglutathione hydrolase [EC:3.1.2.6]
Rhodococcus opacus B4	pROB01	ROP_RS41960	K07492	1.8e-31	putative transposase
Rhodococcus opacus B4	pROB01	ROP_RS37565	K02483	2e-69	two-component system, OmpR family, response regulator
Rhodococcus opacus B4	pROB01	ROP_RS37585	K09771	6.3e-47	small multidrug resistance family-3 protein
Rhodococcus opacus B4	pROB01	ROP_RS37595	K07486	1.1e-54	transposase
Rhodococcus opacus B4	pROB01	ROP_RS42015	K07497	4.4e-15	putative transposase
Rhodococcus opacus B4	pROB01	ROP_RS37720	K07482	1.7e-122	transposase, IS30 family
Rhodococcus opacus B4	pROB01	ROP_RS37725	K07483	1.5e-14	transposase
Rhodococcus opacus B4	pROB01	ROP_RS37755	K02065	9e-138	phospholipid/cholesterol/gamma-HCH transport system ATP-binding protein
Rhodococcus opacus B4	pROB01	ROP_RS37760	K18481	2.3e-43	Mce-associated membrane protein
Rhodococcus opacus B4	pROB01	ROP_RS37765	K18481	4.6e-42	Mce-associated membrane protein
Rhodococcus opacus B4	pROB01	ROP_RS37770	K02067	1.1e-60	phospholipid/cholesterol/gamma-HCH transport system substrate-binding protein
Rhodococcus opacus B4	pROB01	ROP_RS37775	K02067	1.9e-47	phospholipid/cholesterol/gamma-HCH transport system substrate-binding protein
Rhodococcus opacus B4	pROB01	ROP_RS37780	K02067	4.1e-65	phospholipid/cholesterol/gamma-HCH transport system substrate-binding protein
Rhodococcus opacus B4	pROB01	ROP_RS37785	K02067	6.6e-54	phospholipid/cholesterol/gamma-HCH transport system substrate-binding protein
Rhodococcus opacus B4	pROB01	ROP_RS37790	K02067	4.4e-66	phospholipid/cholesterol/gamma-HCH transport system substrate-binding protein
Rhodococcus opacus B4	pROB01	ROP_RS37795	K02067	1.7e-47	phospholipid/cholesterol/gamma-HCH transport system substrate-binding protein
Rhodococcus opacus B4	pROB01	ROP_RS37800	K02066	2.3e-67	phospholipid/cholesterol/gamma-HCH transport system permease protein
Rhodococcus opacus B4	pROB01	ROP_RS37805	K02066	4.8e-81	phospholipid/cholesterol/gamma-HCH transport system permease protein
Rhodococcus opacus B4	pROB01	ROP_RS37810	K00666	2.3e-178	fatty-acyl-CoA synthase [EC:6.2.1.-]
Rhodococcus opacus B4	pROB01	ROP_RS37820	K00130	1.4e-207	betaine-aldehyde dehydrogenase [EC:1.2.1.8]
Rhodococcus opacus B4	pROB01	ROP_RS37820	K00128	1.5e-188	aldehyde dehydrogenase (NAD+) [EC:1.2.1.3]
Rhodococcus opacus B4	pROB01	ROP_RS37830	K21567	4.2e-121	ferredoxin/flavodoxin---NADP+ reductase [EC:1.18.1.2 1.19.1.1]
Rhodococcus opacus B4	pROB01	ROP_RS37835	K00526	1e-55	ribonucleoside-diphosphate reductase beta chain [EC:1.17.4.1]
Rhodococcus opacus B4	pROB01	ROP_RS37840	K00119	7.4e-164	alcohol dehydrogenase (nicotinoprotein) [EC:1.1.99.36]
Rhodococcus opacus B4	pROB01	ROP_RS37855	K13419	0	serine/threonine-protein kinase PknK [EC:2.7.11.1]
Rhodococcus opacus B4	pROB01	ROP_RS37855	K03556	4.4e-128	LuxR family transcriptional regulator, maltose regulon positive regulatory protein
Rhodococcus opacus B4	pROB01	ROP_RS37855	K12132	1.4e-83	eukaryotic-like serine/threonine-protein kinase [EC:2.7.11.1]
Rhodococcus opacus B4	pROB01	ROP_RS37860	K07494	3.1e-27	putative transposase
Rhodococcus opacus B4	pROB01	ROP_RS37885	K24530	3.1e-22	ferredoxin
Rhodococcus opacus B4	pROB01	ROP_RS37885	K05337	2.2e-15	ferredoxin
Rhodococcus opacus B4	pROB01	ROP_RS37890	K00529	1.8e-135	3-phenylpropionate/trans-cinnamate dioxygenase ferredoxin reductase component [EC:1.18.1.3]
Rhodococcus opacus B4	pROB01	ROP_RS37920	K08167	9.7e-126	MFS transporter, DHA2 family, multidrug resistance protein
Rhodococcus opacus B4	pROB01	ROP_RS37940	K07497	9.4e-52	putative transposase
Rhodococcus opacus B4	pROB01	ROP_RS37940	K07483	6e-27	transposase
Rhodococcus opacus B4	pROB01	ROP_RS37955	K00496	1.2e-206	alkane 1-monooxygenase [EC:1.14.15.3]
Rhodococcus opacus B4	pROB01	ROP_RS37965	K00529	5e-146	3-phenylpropionate/trans-cinnamate dioxygenase ferredoxin reductase component [EC:1.18.1.3]
Rhodococcus opacus B4	pROB01	ROP_RS37990	K18446	2.6e-32	triphosphatase [EC:3.6.1.25]
Rhodococcus opacus B4	pROB01	ROP_RS38030	K02039	1.8e-52	phosphate transport system protein
Rhodococcus opacus B4	pROB01	ROP_RS38050	K02036	3.6e-143	phosphate transport system ATP-binding protein [EC:7.3.2.1]
Rhodococcus opacus B4	pROB01	ROP_RS38055	K02038	1.9e-100	phosphate transport system permease protein
Rhodococcus opacus B4	pROB01	ROP_RS38060	K02037	2.8e-102	phosphate transport system permease protein
Rhodococcus opacus B4	pROB01	ROP_RS38065	K02040	3.9e-88	phosphate transport system substrate-binding protein
Rhodococcus opacus B4	pROB01	ROP_RS38080	K04763	3e-56	integrase/recombinase XerD
Rhodococcus opacus B4	pROB01	ROP_RS38100	K07497	5.4e-39	putative transposase
Rhodococcus opacus B4	pROB01	ROP_RS38100	K07483	2.2e-19	transposase
Rhodococcus opacus B4	pROB01	ROP_RS38130	K14060	2.3e-40	putative DNA-invertase from lambdoid prophage Rac
Rhodococcus opacus B4	pROB01	ROP_RS38175	K23262	2.3e-47	gas vesicle structural protein
Rhodococcus opacus B4	pROB01	ROP_RS38195	K01644	4.2e-91	citrate lyase subunit beta / citryl-CoA lyase [EC:4.1.3.34]
Rhodococcus opacus B4	pROB01	ROP_RS38210	K01644	1.4e-77	citrate lyase subunit beta / citryl-CoA lyase [EC:4.1.3.34]
Rhodococcus opacus B4	pROB01	ROP_RS42095	K07497	4.4e-15	putative transposase
Rhodococcus opacus B4	pROB01	ROP_RS38245	K07482	1.7e-122	transposase, IS30 family
Rhodococcus opacus B4	pROB01	ROP_RS42990	K07497	1.2e-09	putative transposase
Rhodococcus opacus B4	pROB01	ROP_RS42105	K07483	6.5e-21	transposase
Rhodococcus opacus B4	pROB01	ROP_RS38300	K07482	5.6e-116	transposase, IS30 family
Rhodococcus opacus B4	pROB01	ROP_RS38410	K01971	1.5e-77	bifunctional non-homologous end joining protein LigD [EC:6.5.1.1]
Rhodococcus opacus B4	pROB01	ROP_RS38430	K03641	3.8e-47	TolB protein
Rhodococcus opacus B4	pROB01	ROP_RS40635	K00573	6.2e-39	protein-L-isoaspartate(D-aspartate) O-methyltransferase [EC:2.1.1.77]
Rhodococcus opacus B4	pROB01	ROP_RS38475	K14060	2.9e-45	putative DNA-invertase from lambdoid prophage Rac
Rhodococcus opacus B4	pROB02	ROP_RS38740	K00558	9.1e-69	DNA (cytosine-5)-methyltransferase 1 [EC:2.1.1.37]
Rhodococcus opacus B4	pROB02	ROP_RS38745	K07451	1.8e-09	5-methylcytosine-specific restriction enzyme A [EC:3.1.21.-]
Rhodococcus opacus B4	pROB02	ROP_RS38755	K07458	8.7e-58	DNA mismatch endonuclease, patch repair protein [EC:3.1.-.-]
Rhodococcus opacus B4	pROB02	ROP_RS38820	K01458	5.1e-42	N-formylglutamate deformylase [EC:3.5.1.68]
Rhodococcus opacus B4	pROB02	ROP_RS38845	K03466	7.7e-23	DNA segregation ATPase FtsK/SpoIIIE, S-DNA-T family
Rhodococcus opacus B4	pROB02	ROP_RS38850	K03466	1.9e-24	DNA segregation ATPase FtsK/SpoIIIE, S-DNA-T family
Rhodococcus opacus B4	pROB02	ROP_RS38895	K07496	1.2e-125	putative transposase
Rhodococcus opacus B4	pROB02	ROP_RS38920	K06190	1.9e-51	intracellular septation protein
Rhodococcus opacus B4	pROB02	ROP_RS38950	K07486	4.6e-37	transposase
Rhodococcus opacus B4	pROB02	ROP_RS38960	K03496	1.3e-56	chromosome partitioning protein
Rhodococcus opacus B4	pROB02	ROP_RS38980	K07497	6.6e-26	putative transposase
Rhodococcus opacus B4	pROB02	ROP_RS39025	K03762	8.3e-144	MFS transporter, MHS family, proline/betaine transporter
Rhodococcus opacus B4	pROB02	ROP_RS39045	K04763	1.4e-63	integrase/recombinase XerD
Rhodococcus opacus B4	pROB02	ROP_RS39060	K07485	2.2e-72	transposase
Rhodococcus opacus B4	pROB02	ROP_RS39065	K00986	5.4e-83	RNA-directed DNA polymerase [EC:2.7.7.49]
Rhodococcus opacus B4	pROB02	ROP_RS39070	K07497	2.4e-27	putative transposase
Rhodococcus opacus B4	pROB02	ROP_RS39135	K00632	4.2e-158	acetyl-CoA acyltransferase [EC:2.3.1.16]
Rhodococcus opacus B4	pROB02	ROP_RS39135	K00626	1.8e-125	acetyl-CoA C-acetyltransferase [EC:2.3.1.9]
Rhodococcus opacus B4	pROB02	ROP_RS39140	K00249	6.1e-111	acyl-CoA dehydrogenase [EC:1.3.8.7]
Rhodococcus opacus B4	pROB02	ROP_RS39150	K01796	3.6e-138	alpha-methylacyl-CoA racemase [EC:5.1.99.4]
Rhodococcus opacus B4	pROB02	ROP_RS39155	K03379	4.3e-174	cyclohexanone monooxygenase [EC:1.14.13.22]
Rhodococcus opacus B4	pROB02	ROP_RS39160	K09684	1.6e-62	PucR family transcriptional regulator, purine catabolism regulatory protein
Rhodococcus opacus B4	pROB02	ROP_RS39170	K07107	1.8e-20	acyl-CoA thioester hydrolase [EC:3.1.2.-]
Rhodococcus opacus B4	pROB02	ROP_RS39180	K01796	3.7e-177	alpha-methylacyl-CoA racemase [EC:5.1.99.4]
Rhodococcus opacus B4	pROB02	ROP_RS39200	K05799	6.8e-46	GntR family transcriptional regulator, transcriptional repressor for pyruvate dehydrogenase complex
Rhodococcus opacus B4	pROB02	ROP_RS39205	K00529	2.7e-133	3-phenylpropionate/trans-cinnamate dioxygenase ferredoxin reductase component [EC:1.18.1.3]
Rhodococcus opacus B4	pROB02	ROP_RS39210	K05337	2.3e-17	ferredoxin
Rhodococcus opacus B4	pROB02	ROP_RS39215	K01006	2.5e-210	pyruvate, orthophosphate dikinase [EC:2.7.9.1]
Rhodococcus opacus B4	pROB02	ROP_RS39235	K24012	9e-200	acetate---CoA ligase (ADP-forming) [EC:6.2.1.13]
Rhodococcus opacus B4	pROB02	ROP_RS39250	K01104	1.1e-27	protein-tyrosine phosphatase [EC:3.1.3.48]
Rhodococcus opacus B4	pROB02	ROP_RS39290	K12466	2.6e-118	(+)-trans-carveol dehydrogenase [EC:1.1.1.275]
Rhodococcus opacus B4	pROB02	ROP_RS39295	K01692	5.6e-70	enoyl-CoA hydratase [EC:4.2.1.17]
Rhodococcus opacus B4	pROB02	ROP_RS39300	K00666	1.8e-168	fatty-acyl-CoA synthase [EC:6.2.1.-]
Rhodococcus opacus B4	pROB02	ROP_RS39315	K00632	4.6e-158	acetyl-CoA acyltransferase [EC:2.3.1.16]
Rhodococcus opacus B4	pROB02	ROP_RS39315	K00626	7e-129	acetyl-CoA C-acetyltransferase [EC:2.3.1.9]
Rhodococcus opacus B4	pROB02	ROP_RS39340	K19802	2.3e-105	L-Ala-D/L-Glu epimerase [EC:5.1.1.20]
Rhodococcus opacus B4	pROB02	ROP_RS39355	K01039	1.6e-84	glutaconate CoA-transferase, subunit A [EC:2.8.3.12]
Rhodococcus opacus B4	pROB02	ROP_RS42250	K01040	2e-77	glutaconate CoA-transferase, subunit B [EC:2.8.3.12]
Rhodococcus opacus B4	pROB02	ROP_RS39360	K18702	8.4e-146	CoA:oxalate CoA-transferase [EC:2.8.3.19]
Rhodococcus opacus B4	pROB02	ROP_RS39400	K07492	3.3e-79	putative transposase
Rhodococcus opacus B4	pROB02	ROP_RS39410	K08689	1.2e-276	biphenyl 2,3-dioxygenase subunit alpha [EC:1.14.12.18]
Rhodococcus opacus B4	pROB02	ROP_RS39415	K15750	6.7e-94	biphenyl 2,3-dioxygenase subunit beta [EC:1.14.12.18]
Rhodococcus opacus B4	pROB02	ROP_RS39415	K14749	2.9e-56	ethylbenzene dioxygenase subunit beta [EC:1.14.12.-]
Rhodococcus opacus B4	pROB02	ROP_RS39420	K18087	7.5e-54	biphenyl 2,3-dioxygenase ferredoxin component
Rhodococcus opacus B4	pROB02	ROP_RS39420	K05710	4.4e-36	3-phenylpropionate/trans-cinnamate dioxygenase ferredoxin component
Rhodococcus opacus B4	pROB02	ROP_RS39425	K18088	1.8e-230	biphenyl 2,3-dioxygenase ferredoxin reductase component [EC:1.18.1.3]
Rhodococcus opacus B4	pROB02	ROP_RS39425	K00529	3e-125	3-phenylpropionate/trans-cinnamate dioxygenase ferredoxin reductase component [EC:1.18.1.3]
Rhodococcus opacus B4	pROB02	ROP_RS39430	K00462	1.1e-132	biphenyl-2,3-diol 1,2-dioxygenase [EC:1.13.11.39]
Rhodococcus opacus B4	pROB02	ROP_RS39435	K08690	6.5e-139	cis-2,3-dihydrobiphenyl-2,3-diol dehydrogenase [EC:1.3.1.56]
Rhodococcus opacus B4	pROB02	ROP_RS39435	K05711	4.3e-116	2,3-dihydroxy-2,3-dihydrophenylpropionate dehydrogenase [EC:1.3.1.87]
Rhodococcus opacus B4	pROB02	ROP_RS39440	K02486	5.8e-160	two-component system, sensor kinase [EC:2.7.13.3]
Rhodococcus opacus B4	pROB02	ROP_RS42270	K07492	2.6e-34	putative transposase
Rhodococcus opacus B4	pROB02	ROP_RS39480	K00344	4.5e-89	NADPH:quinone reductase [EC:1.6.5.5]
Rhodococcus opacus B4	pROB02	ROP_RS39490	K18092	5.6e-127	2-hydroxy-6-oxo-octa-2,4-dienoate hydrolase [EC:3.7.1.-]
Rhodococcus opacus B4	pROB02	ROP_RS39490	K10216	5.4e-121	2-hydroxymuconate-semialdehyde hydrolase [EC:3.7.1.9]
Rhodococcus opacus B4	pROB02	ROP_RS39530	K00446	3e-68	catechol 2,3-dioxygenase [EC:1.13.11.2]
Rhodococcus opacus B4	pROB02	ROP_RS39545	K00483	4e-169	4-hydroxyphenylacetate 3-monooxygenase [EC:1.14.14.9]
Rhodococcus opacus B4	pROB02	ROP_RS39550	K05714	1.4e-86	2-hydroxy-6-oxonona-2,4-dienedioate hydrolase [EC:3.7.1.14]
Rhodococcus opacus B4	pROB02	ROP_RS39565	K05713	2.4e-132	2,3-dihydroxyphenylpropionate 1,2-dioxygenase [EC:1.13.11.16]
Rhodococcus opacus B4	pROB02	ROP_RS39575	K01666	7.3e-60	4-hydroxy 2-oxovalerate aldolase [EC:4.1.3.39]
Rhodococcus opacus B4	pROB02	ROP_RS39580	K03521	9.8e-50	electron transfer flavoprotein beta subunit
Rhodococcus opacus B4	pROB02	ROP_RS39590	K22293	5.7e-53	GntR family transcriptional regulator, rspAB operon transcriptional repressor
Rhodococcus opacus B4	pROB02	ROP_RS39590	K05799	8.9e-43	GntR family transcriptional regulator, transcriptional repressor for pyruvate dehydrogenase complex
Rhodococcus opacus B4	pROB02	ROP_RS39690	K01666	8.1e-145	4-hydroxy 2-oxovalerate aldolase [EC:4.1.3.39]
Rhodococcus opacus B4	pROB02	ROP_RS39695	K04073	5.4e-147	acetaldehyde dehydrogenase [EC:1.2.1.10]
Rhodococcus opacus B4	pROB02	ROP_RS39700	K02554	5e-100	2-keto-4-pentenoate hydratase [EC:4.2.1.80]
Rhodococcus opacus DSM 44186	pRop44186a	FXW36_RS00300	K13419	0	serine/threonine-protein kinase PknK [EC:2.7.11.1]
Rhodococcus opacus DSM 44186	pRop44186a	FXW36_RS00300	K03556	2.7e-130	LuxR family transcriptional regulator, maltose regulon positive regulatory protein
Rhodococcus opacus DSM 44186	pRop44186a	FXW36_RS00300	K12132	3.2e-83	eukaryotic-like serine/threonine-protein kinase [EC:2.7.11.1]
Rhodococcus opacus DSM 44186	pRop44186a	FXW36_RS00365	K08282	4.5e-85	non-specific serine/threonine protein kinase [EC:2.7.11.1]
Rhodococcus opacus DSM 44186	pRop44186a	FXW36_RS00365	K12132	3.2e-83	eukaryotic-like serine/threonine-protein kinase [EC:2.7.11.1]
Rhodococcus opacus DSM 44186	pRop44186a	FXW36_RS00380	K21159	2.5e-150	epoxide hydrolase
Rhodococcus opacus DSM 44186	pRop44186a	FXW36_RS00395	K04063	2.1e-57	lipoyl-dependent peroxiredoxin [EC:1.11.1.28]
Rhodococcus opacus DSM 44186	pRop44186a	FXW36_RS00410	K00485	8.4e-111	dimethylaniline monooxygenase (N-oxide forming) [EC:1.14.13.8]
Rhodococcus opacus DSM 44186	pRop44186a	FXW36_RS00415	K01066	2.8e-72	acetyl esterase [EC:3.1.1.-]
Rhodococcus opacus DSM 44186	pRop44186a	FXW36_RS00425	K01796	1.1e-173	alpha-methylacyl-CoA racemase [EC:5.1.99.4]
Rhodococcus opacus DSM 44186	pRop44186a	FXW36_RS00430	K08683	1.7e-90	3-hydroxyacyl-CoA dehydrogenase / 3-hydroxy-2-methylbutyryl-CoA dehydrogenase [EC:1.1.1.35 1.1.1.178]
Rhodococcus opacus DSM 44186	pRop44186a	FXW36_RS00435	K14520	3.3e-259	4-hydroxyacetophenone monooxygenase [EC:1.14.13.84]
Rhodococcus opacus DSM 44186	pRop44186a	FXW36_RS00445	K00382	8e-155	dihydrolipoamide dehydrogenase [EC:1.8.1.4]
Rhodococcus opacus DSM 44186	pRop44186a	FXW36_RS00450	K09699	5.6e-137	2-oxoisovalerate dehydrogenase E2 component (dihydrolipoyl transacylase) [EC:2.3.1.168]
Rhodococcus opacus DSM 44186	pRop44186a	FXW36_RS00510	K01999	6e-42	branched-chain amino acid transport system substrate-binding protein
Rhodococcus opacus DSM 44186	pRop44186a	FXW36_RS00515	K01995	4.3e-104	branched-chain amino acid transport system ATP-binding protein
Rhodococcus opacus DSM 44186	pRop44186a	FXW36_RS00520	K01996	1.5e-97	branched-chain amino acid transport system ATP-binding protein
Rhodococcus opacus DSM 44186	pRop44186a	FXW36_RS00525	K01997	3.9e-72	branched-chain amino acid transport system permease protein
Rhodococcus opacus DSM 44186	pRop44186a	FXW36_RS00530	K01998	1e-74	branched-chain amino acid transport system permease protein
Rhodococcus opacus DSM 44186	pRop44186a	FXW36_RS00570	K13419	0	serine/threonine-protein kinase PknK [EC:2.7.11.1]
Rhodococcus opacus DSM 44186	pRop44186a	FXW36_RS00570	K03556	1.5e-117	LuxR family transcriptional regulator, maltose regulon positive regulatory protein
Rhodococcus opacus DSM 44186	pRop44186a	FXW36_RS00570	K12132	8.1e-82	eukaryotic-like serine/threonine-protein kinase [EC:2.7.11.1]
Rhodococcus opacus DSM 44186	pRop44186a	FXW36_RS00580	K10701	1.2e-31	acetophenone carboxylase [EC:6.4.1.8]
Rhodococcus opacus DSM 44186	pRop44186a	FXW36_RS00590	K00459	5.8e-60	nitronate monooxygenase [EC:1.13.12.16]
Rhodococcus opacus DSM 44186	pRop44186a	FXW36_RS00615	K07487	6.5e-60	transposase
Rhodococcus opacus DSM 44186	pRop44186a	FXW36_RS00655	K14731	9.7e-92	epsilon-lactone hydrolase [EC:3.1.1.83]
Rhodococcus opacus DSM 44186	pRop44186a	FXW36_RS00660	K00059	7.9e-82	3-oxoacyl-[acyl-carrier protein] reductase [EC:1.1.1.100]
Rhodococcus opacus DSM 44186	pRop44186a	FXW36_RS00665	K00666	1.4e-175	fatty-acyl-CoA synthase [EC:6.2.1.-]
Rhodococcus opacus DSM 44186	pRop44186a	FXW36_RS00690	K07497	4e-25	putative transposase
Rhodococcus opacus DSM 44186	pRop44186a	FXW36_RS00705	K03379	2.6e-182	cyclohexanone monooxygenase [EC:1.14.13.22]
Rhodococcus opacus DSM 44186	pRop44186a	FXW36_RS00710	K18955	6.8e-26	WhiB family transcriptional regulator, redox-sensing transcriptional regulator
Rhodococcus opacus DSM 44186	pRop44186a	FXW36_RS00715	K07497	0.00089	putative transposase
Rhodococcus opacus DSM 44186	pRop44186a	FXW36_RS00725	K00626	6.8e-41	acetyl-CoA C-acetyltransferase [EC:2.3.1.9]
Rhodococcus opacus DSM 44186	pRop44186a	FXW36_RS00750	K07068	1.4e-12	uncharacterized protein
Rhodococcus opacus DSM 44186	pRop44186a	FXW36_RS00755	K00626	4.3e-20	acetyl-CoA C-acetyltransferase [EC:2.3.1.9]
Rhodococcus opacus DSM 44186	pRop44186a	FXW36_RS00770	K18955	5.4e-26	WhiB family transcriptional regulator, redox-sensing transcriptional regulator
Rhodococcus opacus DSM 44186	pRop44186a	FXW36_RS00820	K13075	4.6e-46	N-acyl homoserine lactone hydrolase [EC:3.1.1.81]
Rhodococcus opacus DSM 44186	pRop44186a	FXW36_RS00825	K00020	9.4e-76	3-hydroxyisobutyrate dehydrogenase [EC:1.1.1.31]
Rhodococcus opacus DSM 44186	pRop44186a	FXW36_RS00840	K01796	1.2e-152	alpha-methylacyl-CoA racemase [EC:5.1.99.4]
Rhodococcus opacus DSM 44186	pRop44186a	FXW36_RS00855	K18290	1.3e-50	itaconyl-CoA hydratase [EC:4.2.1.56]
Rhodococcus opacus DSM 44186	pRop44186a	FXW36_RS00860	K22108	4.1e-46	TetR/AcrR family transcriptional regulator, cholesterol catabolism regulator
Rhodococcus opacus DSM 44186	pRop44186a	FXW36_RS00865	K01644	3.5e-83	citrate lyase subunit beta / citryl-CoA lyase [EC:4.1.3.34]
Rhodococcus opacus DSM 44186	pRop44186a	FXW36_RS00870	K03762	2.7e-146	MFS transporter, MHS family, proline/betaine transporter
Rhodococcus opacus DSM 44186	pRop44186a	FXW36_RS00880	K22108	3.7e-43	TetR/AcrR family transcriptional regulator, cholesterol catabolism regulator
Rhodococcus opacus DSM 44186	pRop44186a	FXW36_RS00885	K08282	6.9e-89	non-specific serine/threonine protein kinase [EC:2.7.11.1]
Rhodococcus opacus DSM 44186	pRop44186a	FXW36_RS00885	K12132	3.8e-85	eukaryotic-like serine/threonine-protein kinase [EC:2.7.11.1]
Rhodococcus opacus DSM 44186	pRop44186a	FXW36_RS00915	K00249	1.6e-117	acyl-CoA dehydrogenase [EC:1.3.8.7]
Rhodococcus opacus DSM 44186	pRop44186a	FXW36_RS00920	K00626	2.2e-31	acetyl-CoA C-acetyltransferase [EC:2.3.1.9]
Rhodococcus opacus DSM 44186	pRop44186a	FXW36_RS00925	K07068	4e-22	uncharacterized protein
Rhodococcus opacus DSM 44186	pRop44186a	FXW36_RS00930	K07068	1.6e-23	uncharacterized protein
Rhodococcus opacus DSM 44186	pRop44186a	FXW36_RS00935	K00626	4.7e-24	acetyl-CoA C-acetyltransferase [EC:2.3.1.9]
Rhodococcus opacus DSM 44186	pRop44186a	FXW36_RS00940	K07543	7.4e-143	benzylsuccinate CoA-transferase BbsE subunit [EC:2.8.3.15]
Rhodococcus opacus DSM 44186	pRop44186a	FXW36_RS00945	K07544	2e-164	benzylsuccinate CoA-transferase BbsF subunit [EC:2.8.3.15]
Rhodococcus opacus DSM 44186	pRop44186a	FXW36_RS00980	K05337	3.6e-14	ferredoxin
Rhodococcus opacus DSM 44186	pRop44186a	FXW36_RS00985	K12466	3.6e-116	(+)-trans-carveol dehydrogenase [EC:1.1.1.275]
Rhodococcus opacus DSM 44186	pRop44186a	FXW36_RS01010	K07495	2.8e-35	putative transposase
Rhodococcus opacus DSM 44186	pRop44186a	FXW36_RS01025	K01810	1.4e-258	glucose-6-phosphate isomerase [EC:5.3.1.9]
Rhodococcus opacus DSM 44186	pRop44186a	FXW36_RS01040	K01039	4.6e-56	glutaconate CoA-transferase, subunit A [EC:2.8.3.12]
Rhodococcus opacus DSM 44186	pRop44186a	FXW36_RS01050	K11947	1.4e-208	aldehyde dehydrogenase [EC:1.2.1.-]
Rhodococcus opacus DSM 44186	pRop44186a	FXW36_RS01070	K07229	8.9e-37	ferric-chelate reductase (NADPH) [EC:1.16.1.9]
Rhodococcus opacus DSM 44186	pRop44186a	FXW36_RS01075	K08369	1.1e-117	MFS transporter, putative metabolite:H+ symporter
Rhodococcus opacus DSM 44186	pRop44186a	FXW36_RS01085	K00249	9.1e-107	acyl-CoA dehydrogenase [EC:1.3.8.7]
Rhodococcus opacus DSM 44186	pRop44186a	FXW36_RS01100	K10218	8.8e-71	4-hydroxy-4-methyl-2-oxoglutarate aldolase [EC:4.1.3.17]
Rhodococcus opacus DSM 44186	pRop44186a	FXW36_RS01105	K16515	5.6e-77	4-oxalomesaconate hydratase [EC:4.2.1.83]
Rhodococcus opacus DSM 44186	pRop44186a	FXW36_RS01125	K18068	1.7e-149	phthalate 4,5-dioxygenase [EC:1.14.12.7]
Rhodococcus opacus DSM 44186	pRop44186a	FXW36_RS01130	K08683	3.1e-89	3-hydroxyacyl-CoA dehydrogenase / 3-hydroxy-2-methylbutyryl-CoA dehydrogenase [EC:1.1.1.35 1.1.1.178]
Rhodococcus opacus DSM 44186	pRop44186a	FXW36_RS01145	K00059	1.3e-84	3-oxoacyl-[acyl-carrier protein] reductase [EC:1.1.1.100]
Rhodococcus opacus DSM 44186	pRop44186a	FXW36_RS01150	K00666	1.5e-167	fatty-acyl-CoA synthase [EC:6.2.1.-]
Rhodococcus opacus DSM 44186	pRop44186a	FXW36_RS01160	K00175	6.8e-134	2-oxoglutarate/2-oxoacid ferredoxin oxidoreductase subunit beta [EC:1.2.7.3 1.2.7.11]
Rhodococcus opacus DSM 44186	pRop44186a	FXW36_RS01165	K00174	2.3e-226	2-oxoglutarate/2-oxoacid ferredoxin oxidoreductase subunit alpha [EC:1.2.7.3 1.2.7.11]
Rhodococcus opacus DSM 44186	pRop44186a	FXW36_RS01180	K01999	3.7e-52	branched-chain amino acid transport system substrate-binding protein
Rhodococcus opacus DSM 44186	pRop44186a	FXW36_RS01185	K01997	2.9e-63	branched-chain amino acid transport system permease protein
Rhodococcus opacus DSM 44186	pRop44186a	FXW36_RS01190	K01998	9.5e-73	branched-chain amino acid transport system permease protein
Rhodococcus opacus DSM 44186	pRop44186a	FXW36_RS01195	K07492	4.3e-23	putative transposase
Rhodococcus opacus DSM 44186	pRop44186a	FXW36_RS01215	K00635	6.9e-127	diacylglycerol O-acyltransferase / wax synthase [EC:2.3.1.20 2.3.1.75]
Rhodococcus opacus DSM 44186	pRop44186a	FXW36_RS01230	K19784	8.2e-57	chromate reductase, NAD(P)H dehydrogenase (quinone)
Rhodococcus opacus DSM 44186	pRop44186a	FXW36_RS01235	K15777	1.2e-92	4,5-DOPA dioxygenase extradiol [EC:1.13.11.-]
Rhodococcus opacus DSM 44186	pRop44186a	FXW36_RS01265	K04047	3.4e-40	starvation-inducible DNA-binding protein
Rhodococcus opacus DSM 44186	pRop44186a	FXW36_RS01285	K07507	6.4e-59	putative Mg2+ transporter-C (MgtC) family protein
Rhodococcus opacus DSM 44186	pRop44186a	FXW36_RS01305	K09780	3.9e-17	uncharacterized protein
Rhodococcus opacus DSM 44186	pRop44186a	FXW36_RS01315	K01607	1.2e-06	4-carboxymuconolactone decarboxylase [EC:4.1.1.44]
Rhodococcus opacus DSM 44186	pRop44186a	FXW36_RS01320	K01681	0	aconitate hydratase [EC:4.2.1.3]
Rhodococcus opacus DSM 44186	pRop44186a	FXW36_RS01325	K00240	4.8e-95	succinate dehydrogenase / fumarate reductase, iron-sulfur subunit [EC:1.3.5.1 1.3.5.4]
Rhodococcus opacus DSM 44186	pRop44186a	FXW36_RS01365	K00529	3.6e-158	3-phenylpropionate/trans-cinnamate dioxygenase ferredoxin reductase component [EC:1.18.1.3]
Rhodococcus opacus DSM 44186	pRop44186a	FXW36_RS01370	K00616	7e-63	transaldolase [EC:2.2.1.2]
Rhodococcus opacus DSM 44186	pRop44186a	FXW36_RS01390	K01495	3.7e-74	GTP cyclohydrolase IA [EC:3.5.4.16]
Rhodococcus opacus DSM 44186	pRop44186a	FXW36_RS01405	K05524	8.8e-36	ferredoxin
Rhodococcus opacus DSM 44186	pRop44186a	FXW36_RS01410	K02274	4.1e-274	cytochrome c oxidase subunit I [EC:7.1.1.9]
Rhodococcus opacus DSM 44186	pRop44186a	FXW36_RS01435	K07816	1.1e-83	GTP pyrophosphokinase [EC:2.7.6.5]
Rhodococcus opacus DSM 44186	pRop44186a	FXW36_RS01455	K01673	1.2e-45	carbonic anhydrase [EC:4.2.1.1]
Rhodococcus opacus DSM 44186	pRop44186a	FXW36_RS01480	K01596	0	phosphoenolpyruvate carboxykinase (GTP) [EC:4.1.1.32]
Rhodococcus opacus DSM 44186	pRop44186a	FXW36_RS01485	K03321	1.6e-130	sulfate permease, SulP family
Rhodococcus opacus DSM 44186	pRop44186a	FXW36_RS01520	K07492	2.5e-21	putative transposase
Rhodococcus opacus DSM 44186	pRop44186a	FXW36_RS01535	K07147	5.4e-64	methionine sulfoxide reductase catalytic subunit [EC:1.8.-.-]
Rhodococcus opacus DSM 44186	pRop44186a	FXW36_RS01560	K00635	2.5e-138	diacylglycerol O-acyltransferase / wax synthase [EC:2.3.1.20 2.3.1.75]
Rhodococcus opacus DSM 44186	pRop44186a	FXW36_RS01610	K10439	4.5e-65	ribose transport system substrate-binding protein
Rhodococcus opacus DSM 44186	pRop44186a	FXW36_RS01630	K00059	4e-83	3-oxoacyl-[acyl-carrier protein] reductase [EC:1.1.1.100]
Rhodococcus opacus DSM 44186	pRop44186a	FXW36_RS01640	K00217	9.4e-151	maleylacetate reductase [EC:1.3.1.32]
Rhodococcus opacus DSM 44186	pRop44186a	FXW36_RS01645	K04098	2.4e-129	hydroxyquinol 1,2-dioxygenase [EC:1.13.11.37]
Rhodococcus opacus DSM 44186	pRop44186a	FXW36_RS01645	K03381	1.4e-102	catechol 1,2-dioxygenase [EC:1.13.11.1]
Rhodococcus opacus DSM 44186	pRop44186a	FXW36_RS01670	K01971	4.9e-62	bifunctional non-homologous end joining protein LigD [EC:6.5.1.1]
Rhodococcus opacus DSM 44186	pRop44186a	FXW36_RS01730	K01821	1.8e-08	4-oxalocrotonate tautomerase [EC:5.3.2.6]
Rhodococcus opacus DSM 44186	pRop44186a	FXW36_RS01735	K06889	6.6e-43	uncharacterized protein
Rhodococcus opacus DSM 44186	pRop44186a	FXW36_RS01745	K01907	3.3e-250	acetoacetyl-CoA synthetase [EC:6.2.1.16]
Rhodococcus opacus DSM 44186	pRop44186a	FXW36_RS01750	K14063	2.9e-46	AraC family transcriptional regulator, positive regulator of tynA and feaB
Rhodococcus opacus DSM 44186	pRop44186a	FXW36_RS01760	K23948	2.6e-153	NADH:quinone reductase (non-electrogenic) [EC:1.6.5.9]
Rhodococcus opacus DSM 44186	pRop44186a	FXW36_RS01760	K00459	1.7e-69	nitronate monooxygenase [EC:1.13.12.16]
Rhodococcus opacus DSM 44186	pRop44186a	FXW36_RS01765	K01692	2.5e-67	enoyl-CoA hydratase [EC:4.2.1.17]
Rhodococcus opacus DSM 44186	pRop44186a	FXW36_RS01795	K00249	1.2e-133	acyl-CoA dehydrogenase [EC:1.3.8.7]
Rhodococcus opacus DSM 44186	pRop44186a	FXW36_RS01800	K01692	4.9e-68	enoyl-CoA hydratase [EC:4.2.1.17]
Rhodococcus opacus DSM 44186	pRop44186a	FXW36_RS01825	K06889	1.6e-42	uncharacterized protein
Rhodococcus opacus DSM 44186	pRop44186a	FXW36_RS01835	K01897	7.7e-141	long-chain acyl-CoA synthetase [EC:6.2.1.3]
Rhodococcus opacus DSM 44186	pRop44186a	FXW36_RS01845	K00459	3.1e-32	nitronate monooxygenase [EC:1.13.12.16]
Rhodococcus opacus DSM 44186	pRop44186a	FXW36_RS01850	K01692	2e-67	enoyl-CoA hydratase [EC:4.2.1.17]
Rhodococcus opacus DSM 44186	pRop44186a	FXW36_RS01855	K01897	9.6e-141	long-chain acyl-CoA synthetase [EC:6.2.1.3]
Rhodococcus opacus DSM 44186	pRop44186a	FXW36_RS01870	K07492	7.1e-31	putative transposase
Rhodococcus opacus DSM 44186	pRop44186a	FXW36_RS01880	K06889	9.5e-43	uncharacterized protein
Rhodococcus opacus DSM 44186	pRop44186a	FXW36_RS01900	K00249	3.6e-107	acyl-CoA dehydrogenase [EC:1.3.8.7]
Rhodococcus opacus DSM 44186	pRop44186a	FXW36_RS01905	K08282	8.7e-91	non-specific serine/threonine protein kinase [EC:2.7.11.1]
Rhodococcus opacus DSM 44186	pRop44186a	FXW36_RS01905	K12132	1.6e-82	eukaryotic-like serine/threonine-protein kinase [EC:2.7.11.1]
Rhodococcus opacus DSM 44186	pRop44186a	FXW36_RS01915	K00325	1.4e-211	H+-translocating NAD(P) transhydrogenase subunit beta [EC:1.6.1.2 7.1.1.1]
Rhodococcus opacus DSM 44186	pRop44186a	FXW36_RS01920	K00324	2.2e-183	H+-translocating NAD(P) transhydrogenase subunit alpha [EC:1.6.1.2 7.1.1.1]
Rhodococcus opacus DSM 44186	pRop44186a	FXW36_RS01940	K00059	1e-95	3-oxoacyl-[acyl-carrier protein] reductase [EC:1.1.1.100]
Rhodococcus opacus DSM 44186	pRop44186a	FXW36_RS01955	K00626	1.2e-20	acetyl-CoA C-acetyltransferase [EC:2.3.1.9]
Rhodococcus opacus DSM 44186	pRop44186a	FXW36_RS01985	K06893	1.9e-19	uncharacterized protein
Rhodococcus opacus DSM 44186	pRop44186a	FXW36_RS01995	K00626	4.4e-141	acetyl-CoA C-acetyltransferase [EC:2.3.1.9]
Rhodococcus opacus DSM 44186	pRop44186a	FXW36_RS02000	K00059	9e-88	3-oxoacyl-[acyl-carrier protein] reductase [EC:1.1.1.100]
Rhodococcus opacus DSM 44186	pRop44186a	FXW36_RS02010	K00059	1.9e-83	3-oxoacyl-[acyl-carrier protein] reductase [EC:1.1.1.100]
Rhodococcus opacus DSM 44186	pRop44186a	FXW36_RS02020	K03497	9.9e-33	ParB family transcriptional regulator, chromosome partitioning protein
Rhodococcus opacus DSM 44186	pRop44186a	FXW36_RS02035	K07493	2.8e-37	putative transposase
Rhodococcus opacus DSM 44186	pRop44186a	FXW36_RS02055	K01704	1.5e-73	3-isopropylmalate/(R)-2-methylmalate dehydratase small subunit [EC:4.2.1.33 4.2.1.35]
Rhodococcus opacus DSM 44186	pRop44186a	FXW36_RS02060	K18955	1.4e-27	WhiB family transcriptional regulator, redox-sensing transcriptional regulator
Rhodococcus opacus DSM 44186	pRop44186a	FXW36_RS02070	K01027	5.2e-225	3-oxoacid CoA-transferase [EC:2.8.3.5]
Rhodococcus opacus DSM 44186	pRop44186a	FXW36_RS02070	K01028	4.2e-116	3-oxoacid CoA-transferase subunit A [EC:2.8.3.5]
Rhodococcus opacus DSM 44186	pRop44186a	FXW36_RS02070	K01029	5.6e-115	3-oxoacid CoA-transferase subunit B [EC:2.8.3.5]
Rhodococcus opacus DSM 44186	pRop44186a	FXW36_RS02090	K00451	2.4e-76	homogentisate 1,2-dioxygenase [EC:1.13.11.5]
Rhodococcus opacus DSM 44186	pRop44186a	FXW36_RS02125	K18383	2.2e-121	feruloyl-CoA hydratase/lyase [EC:4.1.2.61]
Rhodococcus opacus DSM 44186	pRop44186a	FXW36_RS02140	K00480	9.4e-135	salicylate hydroxylase [EC:1.14.13.1]
Rhodococcus opacus DSM 44186	pRop44186a	FXW36_RS02145	K00217	5.5e-135	maleylacetate reductase [EC:1.3.1.32]
Rhodococcus opacus DSM 44186	pRop44186a	FXW36_RS02150	K04098	1.5e-124	hydroxyquinol 1,2-dioxygenase [EC:1.13.11.37]
Rhodococcus opacus DSM 44186	pRop44186a	FXW36_RS02165	K18955	2.1e-21	WhiB family transcriptional regulator, redox-sensing transcriptional regulator
Rhodococcus opacus DSM 44186	pRop44186a	FXW36_RS02170	K03581	1.9e-139	exodeoxyribonuclease V alpha subunit [EC:3.1.11.5]
Rhodococcus opacus DSM 44186	pRop44186a	FXW36_RS02290	K01458	1.2e-42	N-formylglutamate deformylase [EC:3.5.1.68]
Rhodococcus opacus DSM 44186	pRop44186a	FXW36_RS02300	K07497	2.9e-49	putative transposase
Rhodococcus opacus DSM 44186	pRop44186a	FXW36_RS02300	K07483	1.5e-26	transposase
Rhodococcus opacus DSM 44186	pRop44186a	FXW36_RS02330	K20798	9.9e-68	small RNA 2'-O-methyltransferase [EC:2.1.1.-]
Rhodococcus opacus DSM 44186	pRop44186a	FXW36_RS02360	K07497	1.6e-48	putative transposase
Rhodococcus opacus DSM 44186	pRop44186a	FXW36_RS02360	K07483	1.9e-16	transposase
Rhodococcus opacus DSM 44186	pRop44186a	FXW36_RS02385	K10533	2.2e-29	limonene-1,2-epoxide hydrolase [EC:3.3.2.8]
Rhodococcus opacus DSM 44186	pRop44186a	FXW36_RS02390	K00549	1.3e-59	5-methyltetrahydropteroyltriglutamate--homocysteine methyltransferase [EC:2.1.1.14]
Rhodococcus opacus DSM 44186	pRop44186a	FXW36_RS02395	K01495	1.1e-85	GTP cyclohydrolase IA [EC:3.5.4.16]
Rhodococcus opacus DSM 44186	pRop44186a	FXW36_RS02400	K23842	3e-228	NAD(P)H dehydrogenase (quinone) [EC:1.6.5.2]
Rhodococcus opacus DSM 44186	pRop44186a	FXW36_RS02410	K00796	3.2e-95	dihydropteroate synthase [EC:2.5.1.15]
Rhodococcus opacus DSM 44186	pRop44186a	FXW36_RS02425	K03464	1.9e-23	muconolactone D-isomerase [EC:5.3.3.4]
Rhodococcus opacus DSM 44186	pRop44186a	FXW36_RS02435	K04101	7.2e-126	protocatechuate 4,5-dioxygenase, beta chain [EC:1.13.11.8]
Rhodococcus opacus DSM 44186	pRop44186a	FXW36_RS02440	K04100	1.2e-40	protocatechuate 4,5-dioxygenase, alpha chain [EC:1.13.11.8]
Rhodococcus opacus DSM 44186	pRop44186a	FXW36_RS02445	K01491	8.6e-123	methylenetetrahydrofolate dehydrogenase (NADP+) / methenyltetrahydrofolate cyclohydrolase [EC:1.5.1.5 3.5.4.9]
Rhodococcus opacus DSM 44186	pRop44186a	FXW36_RS02450	K01433	3.7e-140	formyltetrahydrofolate deformylase [EC:3.5.1.10]
Rhodococcus opacus DSM 44186	pRop44186a	FXW36_RS02460	K15066	1.1e-205	vanillate/3-O-methylgallate O-demethylase [EC:2.1.1.341]
Rhodococcus opacus DSM 44186	pRop44186a	FXW36_RS02475	K16515	2e-104	4-oxalomesaconate hydratase [EC:4.2.1.83]
Rhodococcus opacus DSM 44186	pRop44186a	FXW36_RS02480	K10218	6e-77	4-hydroxy-4-methyl-2-oxoglutarate aldolase [EC:4.1.3.17]
Rhodococcus opacus DSM 44186	pRop44186a	FXW36_RS02485	K15066	5e-212	vanillate/3-O-methylgallate O-demethylase [EC:2.1.1.341]
Rhodococcus opacus DSM 44186	pRop44186a	FXW36_RS02495	K02379	2.4e-110	FdhD protein
Rhodococcus opacus DSM 44186	pRop44186a	FXW36_RS02500	K08172	1.9e-165	MFS transporter, MHS family, shikimate and dehydroshikimate transport protein
Rhodococcus opacus DSM 44186	pRop44186a	FXW36_RS02505	K00249	1.3e-109	acyl-CoA dehydrogenase [EC:1.3.8.7]
Rhodococcus opacus DSM 44186	pRop44186a	FXW36_RS02510	K14063	2e-68	AraC family transcriptional regulator, positive regulator of tynA and feaB
Rhodococcus opacus DSM 44186	pRop44186a	FXW36_RS02515	K07483	1.5e-18	transposase
Rhodococcus opacus DSM 44186	pRop44186a	FXW36_RS02520	K07486	4.9e-56	transposase
Rhodococcus opacus DSM 44186	pRop44186a	FXW36_RS02525	K07497	1.2e-27	putative transposase
Rhodococcus opacus DSM 44186	pRop44186a	FXW36_RS02530	K07482	9e-123	transposase, IS30 family
Rhodococcus opacus DSM 44186	pRop44186a	FXW36_RS02535	K07497	1.2e-15	putative transposase
Rhodococcus opacus DSM 44186	pRop44186a	FXW36_RS02555	K03379	2e-187	cyclohexanone monooxygenase [EC:1.14.13.22]
Rhodococcus opacus DSM 44186	pRop44186a	FXW36_RS02560	K00055	4.2e-154	aryl-alcohol dehydrogenase [EC:1.1.1.90]
Rhodococcus opacus DSM 44186	pRop44186a	FXW36_RS02590	K22553	8e-122	4-methoxybenzoate monooxygenase (O-demethylating) [EC:1.14.99.15]
Rhodococcus opacus DSM 44186	pRop44186a	FXW36_RS02605	K03556	5.4e-44	LuxR family transcriptional regulator, maltose regulon positive regulatory protein
Rhodococcus opacus DSM 44186	pRop44186a	FXW36_RS02610	K00055	1.4e-142	aryl-alcohol dehydrogenase [EC:1.1.1.90]
Rhodococcus opacus DSM 44186	pRop44186a	FXW36_RS02620	K07045	1.6e-54	uncharacterized protein
Rhodococcus opacus DSM 44186	pRop44186a	FXW36_RS02625	K18688	2.2e-188	3-oxocholest-4-en-26-oate---CoA ligase [EC:6.2.1.42]
Rhodococcus opacus DSM 44186	pRop44186a	FXW36_RS02655	K01607	1.7e-08	4-carboxymuconolactone decarboxylase [EC:4.1.1.44]
Rhodococcus opacus DSM 44186	pRop44186a	FXW36_RS02680	K00529	5.7e-141	3-phenylpropionate/trans-cinnamate dioxygenase ferredoxin reductase component [EC:1.18.1.3]
Rhodococcus opacus DSM 44186	pRop44186a	FXW36_RS02710	K08172	8.6e-156	MFS transporter, MHS family, shikimate and dehydroshikimate transport protein
Rhodococcus opacus DSM 44186	pRop44186a	FXW36_RS02725	K00467	4.8e-161	lactate 2-monooxygenase [EC:1.13.12.4]
Rhodococcus opacus DSM 44186	pRop44186a	FXW36_RS02730	K03639	3.6e-130	GTP 3',8-cyclase [EC:4.1.99.22]
Rhodococcus opacus DSM 44186	pRop44186a	FXW36_RS02740	K13419	0	serine/threonine-protein kinase PknK [EC:2.7.11.1]
Rhodococcus opacus DSM 44186	pRop44186a	FXW36_RS02740	K03556	1.7e-116	LuxR family transcriptional regulator, maltose regulon positive regulatory protein
Rhodococcus opacus DSM 44186	pRop44186a	FXW36_RS02740	K12132	4.3e-84	eukaryotic-like serine/threonine-protein kinase [EC:2.7.11.1]
Rhodococcus opacus DSM 44186	pRop44186a	FXW36_RS02765	K00344	1.9e-94	NADPH:quinone reductase [EC:1.6.5.5]
Rhodococcus opacus DSM 44186	pRop44186a	FXW36_RS02790	K01897	6.6e-131	long-chain acyl-CoA synthetase [EC:6.2.1.3]
Rhodococcus opacus DSM 44186	pRop44186a	FXW36_RS02810	K16137	1.5e-39	TetR/AcrR family transcriptional regulator, transcriptional repressor for nem operon
Rhodococcus opacus DSM 44186	pRop44186a	FXW36_RS02825	K01908	0	propionyl-CoA synthetase [EC:6.2.1.17]
Rhodococcus opacus DSM 44186	pRop44186a	FXW36_RS02835	K12466	1.2e-123	(+)-trans-carveol dehydrogenase [EC:1.1.1.275]
Rhodococcus opacus DSM 44186	pRop44186a	FXW36_RS02840	K19745	8.6e-141	acrylyl-CoA reductase (NADPH) [EC:1.3.1.-]
Rhodococcus opacus DSM 44186	pRop44186a	FXW36_RS02850	K07486	1.9e-19	transposase
Rhodococcus opacus DSM 44186	pRop44186a	FXW36_RS02855	K07486	4.6e-17	transposase
Rhodococcus opacus DSM 44186	pRop44186a	FXW36_RS02880	K03333	2.2e-141	cholesterol oxidase [EC:1.1.3.6]
Rhodococcus opacus DSM 44186	pRop44186a	FXW36_RS02890	K01821	4.7e-12	4-oxalocrotonate tautomerase [EC:5.3.2.6]
Rhodococcus opacus DSM 44186	pRop44186a	FXW36_RS02920	K01426	2.3e-101	amidase [EC:3.5.1.4]
Rhodococcus opacus DSM 44186	pRop44186a	FXW36_RS02930	K00666	4e-173	fatty-acyl-CoA synthase [EC:6.2.1.-]
Rhodococcus opacus DSM 44186	pRop44186a	FXW36_RS02930	K01897	1.8e-139	long-chain acyl-CoA synthetase [EC:6.2.1.3]
Rhodococcus opacus DSM 44186	pRop44186a	FXW36_RS02950	K10680	1.9e-154	N-ethylmaleimide reductase [EC:1.-.-.-]
Rhodococcus opacus DSM 44186	pRop44186a	FXW36_RS02965	K07482	9.6e-127	transposase, IS30 family
Rhodococcus opacus DSM 44186	pRop44186a	FXW36_RS02975	K07497	7.4e-07	putative transposase
Rhodococcus opacus DSM 44186	pRop44186a	FXW36_RS02985	K01561	2.7e-126	haloacetate dehalogenase [EC:3.8.1.3]
Rhodococcus opacus DSM 44186	pRop44186a	FXW36_RS03015	K14393	4.3e-169	cation/acetate symporter
Rhodococcus opacus DSM 44186	pRop44186a	FXW36_RS03020	K07482	2.4e-55	transposase, IS30 family
Rhodococcus opacus DSM 44186	pRop44186a	FXW36_RS03025	K00175	6.5e-126	2-oxoglutarate/2-oxoacid ferredoxin oxidoreductase subunit beta [EC:1.2.7.3 1.2.7.11]
Rhodococcus opacus DSM 44186	pRop44186a	FXW36_RS03030	K00174	1e-211	2-oxoglutarate/2-oxoacid ferredoxin oxidoreductase subunit alpha [EC:1.2.7.3 1.2.7.11]
Rhodococcus opacus DSM 44186	pRop44186a	FXW36_RS03035	K00138	1.9e-286	aldehyde dehydrogenase [EC:1.2.1.-]
Rhodococcus opacus DSM 44186	pRop44186a	FXW36_RS03040	K09959	2.9e-66	uncharacterized protein
Rhodococcus opacus DSM 44186	pRop44186a	FXW36_RS03045	K03635	1.2e-47	molybdopterin synthase catalytic subunit [EC:2.8.1.12]
Rhodococcus opacus DSM 44186	pRop44186a	FXW36_RS03050	K03639	5.8e-146	GTP 3',8-cyclase [EC:4.1.99.22]
Rhodococcus opacus DSM 44186	pRop44186a	FXW36_RS03055	K03636	3.6e-18	sulfur-carrier protein
Rhodococcus opacus DSM 44186	pRop44186a	FXW36_RS03060	K03750	7.7e-135	molybdopterin molybdotransferase [EC:2.10.1.1]
Rhodococcus opacus DSM 44186	pRop44186a	FXW36_RS03070	K01821	4.1e-10	4-oxalocrotonate tautomerase [EC:5.3.2.6]
Rhodococcus opacus DSM 44186	pRop44186a	FXW36_RS03090	K07497	4e-25	putative transposase
Rhodococcus opacus DSM 44186	pRop44186a	FXW36_RS03105	K03752	4.9e-47	molybdenum cofactor guanylyltransferase [EC:2.7.7.77]
Rhodococcus opacus DSM 44186	pRop44186a	FXW36_RS03110	K03637	2e-75	cyclic pyranopterin monophosphate synthase [EC:4.6.1.17]
Rhodococcus opacus DSM 44186	pRop44186a	FXW36_RS03135	K04763	1.9e-55	integrase/recombinase XerD
Rhodococcus opacus DSM 44186	pRop44186a	FXW36_RS03145	K21147	9.6e-142	sulfur-carrier protein adenylyltransferase/sulfurtransferase [EC:2.7.7.80 2.7.7.- 2.8.1.11 2.8.1.-]
Rhodococcus opacus DSM 44186	pRop44186a	FXW36_RS03150	K07492	1.6e-58	putative transposase
Rhodococcus opacus DSM 44186	pRop44186a	FXW36_RS03160	K05524	1.6e-47	ferredoxin
Rhodococcus opacus DSM 44186	pRop44186a	FXW36_RS03175	K07495	1.9e-09	putative transposase
Rhodococcus opacus DSM 44186	pRop44186a	FXW36_RS03190	K07494	1.4e-24	putative transposase
Rhodococcus opacus DSM 44186	pRop44186a	FXW36_RS03200	K19267	6.4e-42	NAD(P)H dehydrogenase (quinone) [EC:1.6.5.2]
Rhodococcus opacus DSM 44186	pRop44186a	FXW36_RS03210	K01796	4.9e-180	alpha-methylacyl-CoA racemase [EC:5.1.99.4]
Rhodococcus opacus DSM 44186	pRop44186a	FXW36_RS03220	K23948	3.2e-171	NADH:quinone reductase (non-electrogenic) [EC:1.6.5.9]
Rhodococcus opacus DSM 44186	pRop44186a	FXW36_RS03220	K00459	1.2e-71	nitronate monooxygenase [EC:1.13.12.16]
Rhodococcus opacus DSM 44186	pRop44186a	FXW36_RS03225	K01782	1.6e-256	3-hydroxyacyl-CoA dehydrogenase / enoyl-CoA hydratase / 3-hydroxybutyryl-CoA epimerase [EC:1.1.1.35 4.2.1.17 5.1.2.3]
Rhodococcus opacus DSM 44186	pRop44186a	FXW36_RS03230	K00626	4.3e-121	acetyl-CoA C-acetyltransferase [EC:2.3.1.9]
Rhodococcus opacus DSM 44186	pRop44186a	FXW36_RS03240	K02065	1.1e-137	phospholipid/cholesterol/gamma-HCH transport system ATP-binding protein
Rhodococcus opacus DSM 44186	pRop44186a	FXW36_RS03245	K18481	3.4e-43	Mce-associated membrane protein
Rhodococcus opacus DSM 44186	pRop44186a	FXW36_RS03250	K18481	7.8e-41	Mce-associated membrane protein
Rhodococcus opacus DSM 44186	pRop44186a	FXW36_RS03255	K02067	1.1e-59	phospholipid/cholesterol/gamma-HCH transport system substrate-binding protein
Rhodococcus opacus DSM 44186	pRop44186a	FXW36_RS03260	K02067	1.1e-47	phospholipid/cholesterol/gamma-HCH transport system substrate-binding protein
Rhodococcus opacus DSM 44186	pRop44186a	FXW36_RS03265	K02067	4.6e-64	phospholipid/cholesterol/gamma-HCH transport system substrate-binding protein
Rhodococcus opacus DSM 44186	pRop44186a	FXW36_RS03270	K02067	8.1e-54	phospholipid/cholesterol/gamma-HCH transport system substrate-binding protein
Rhodococcus opacus DSM 44186	pRop44186a	FXW36_RS03275	K02067	6e-63	phospholipid/cholesterol/gamma-HCH transport system substrate-binding protein
Rhodococcus opacus DSM 44186	pRop44186a	FXW36_RS03280	K02067	6.7e-45	phospholipid/cholesterol/gamma-HCH transport system substrate-binding protein
Rhodococcus opacus DSM 44186	pRop44186a	FXW36_RS03285	K02066	3.3e-64	phospholipid/cholesterol/gamma-HCH transport system permease protein
Rhodococcus opacus DSM 44186	pRop44186a	FXW36_RS03290	K02066	1.5e-79	phospholipid/cholesterol/gamma-HCH transport system permease protein
Rhodococcus opacus DSM 44186	pRop44186a	FXW36_RS03310	K21685	2.8e-39	LuxR family transcriptional regulator, regulator of acetate metabolism
Rhodococcus opacus DSM 44186	pRop44186a	FXW36_RS03315	K00529	9.9e-125	3-phenylpropionate/trans-cinnamate dioxygenase ferredoxin reductase component [EC:1.18.1.3]
Rhodococcus opacus DSM 44186	pRop44186a	FXW36_RS03320	K24530	2.8e-19	ferredoxin
Rhodococcus opacus DSM 44186	pRop44186a	FXW36_RS03320	K05337	7.7e-17	ferredoxin
Rhodococcus opacus DSM 44186	pRop44186a	FXW36_RS03350	K13237	5.7e-91	2,4-dienoyl-CoA reductase [(3E)-enoyl-CoA-producing], peroxisomal [EC:1.3.1.124]
Rhodococcus opacus DSM 44186	pRop44186a	FXW36_RS03355	K13419	0	serine/threonine-protein kinase PknK [EC:2.7.11.1]
Rhodococcus opacus DSM 44186	pRop44186a	FXW36_RS03355	K03556	2.7e-127	LuxR family transcriptional regulator, maltose regulon positive regulatory protein
Rhodococcus opacus DSM 44186	pRop44186a	FXW36_RS03355	K12132	4.7e-84	eukaryotic-like serine/threonine-protein kinase [EC:2.7.11.1]
Rhodococcus opacus DSM 44186	pRop44186a	FXW36_RS03380	K03496	1.4e-56	chromosome partitioning protein
Rhodococcus opacus DSM 44186	pRop44186a	FXW36_RS03410	K06190	1.2e-51	intracellular septation protein
Rhodococcus opacus DSM 44186	pRop44186a	FXW36_RS03470	K03466	2.4e-22	DNA segregation ATPase FtsK/SpoIIIE, S-DNA-T family
Rhodococcus opacus DSM 44186	pRop44186a	FXW36_RS03520	K01458	2.1e-44	N-formylglutamate deformylase [EC:3.5.1.68]
Rhodococcus opacus DSM 44186	pRop44186a	FXW36_RS03535	K07448	1e-11	restriction system protein
Rhodococcus opacus DSM 44186	pRop44186a	FXW36_RS03545	K07458	1.1e-31	DNA mismatch endonuclease, patch repair protein [EC:3.1.-.-]
Rhodococcus opacus DSM 44186	pRop44186a	FXW36_RS03590	K07486	2.8e-32	transposase
Rhodococcus opacus DSM 44186	pRop44186b	FXW36_RS00015	K06218	7e-14	mRNA interferase RelE/StbE
Rhodococcus opacus DSM 44186	pRop44186b	FXW36_RS00020	K19159	2.7e-17	antitoxin YefM
Rhodococcus opacus DSM 44186	pRop44186b	FXW36_RS00035	K09803	8.8e-10	uncharacterized protein
Rhodococcus opacus DSM 44186	pRop44186b	FXW36_RS00080	K07171	4.2e-30	mRNA interferase MazF [EC:3.1.-.-]
Rhodococcus opacus DSM 44186	pRop44186b	FXW36_RS00090	K06996	8.1e-33	uncharacterized protein
Rhodococcus opacus DSM 44186	pRop44186b	FXW36_RS00100	K07454	5.6e-26	putative restriction endonuclease
Rhodococcus opacus DSM 44186	pRop44186b	FXW36_RS00190	K23262	1.8e-49	gas vesicle structural protein
Rhodococcus opacus DSM 44186	pRop44186b	FXW36_RS00210	K23262	9.9e-16	gas vesicle structural protein
Rhodococcus opacus DSM 44186	pRop44186b	FXW36_RS00225	K06191	7.2e-37	glutaredoxin-like protein NrdH
Rhodococcus opacus DSM 44186	pRop44186b	FXW36_RS00230	K03719	1.6e-44	Lrp/AsnC family transcriptional regulator, leucine-responsive regulatory protein
Rhodococcus opacus DSM 44186	pRop44186b	FXW36_RS00235	K03885	9.3e-139	NADH:ubiquinone reductase (H+-translocating) [EC:7.1.1.2]
Rhodococcus opacus DSM 44186	pRop44186b	FXW36_RS00250	K21159	4.9e-164	epoxide hydrolase
Rhodococcus opacus DSM 44186	pRop44186b	FXW36_RS00255	K11601	4.7e-148	manganese transport system substrate-binding protein
Rhodococcus opacus KT112-7	pRHWK1	GYB82_RS35615	K05799	1.7e-53	GntR family transcriptional regulator, transcriptional repressor for pyruvate dehydrogenase complex
Rhodococcus opacus KT112-7	pRHWK1	GYB82_RS35625	K12141	2.7e-137	hydrogenase-4 component F [EC:1.-.-.-]
Rhodococcus opacus KT112-7	pRHWK1	GYB82_RS35630	K12140	1.1e-40	hydrogenase-4 component E [EC:1.-.-.-]
Rhodococcus opacus KT112-7	pRHWK1	GYB82_RS35640	K12137	1.5e-185	hydrogenase-4 component B [EC:1.-.-.-]
Rhodococcus opacus KT112-7	pRHWK1	GYB82_RS35650	K06193	8.7e-53	protein PhnA
Rhodococcus opacus KT112-7	pRHWK1	GYB82_RS35665	K07492	3.3e-35	putative transposase
Rhodococcus opacus KT112-7	pRHWK1	GYB82_RS35675	K02486	5.6e-159	two-component system, sensor kinase [EC:2.7.13.3]
Rhodococcus opacus KT112-7	pRHWK1	GYB82_RS35685	K08690	6.5e-139	cis-2,3-dihydrobiphenyl-2,3-diol dehydrogenase [EC:1.3.1.56]
Rhodococcus opacus KT112-7	pRHWK1	GYB82_RS35685	K05711	4.3e-116	2,3-dihydroxy-2,3-dihydrophenylpropionate dehydrogenase [EC:1.3.1.87]
Rhodococcus opacus KT112-7	pRHWK1	GYB82_RS35695	K18088	1.8e-230	biphenyl 2,3-dioxygenase ferredoxin reductase component [EC:1.18.1.3]
Rhodococcus opacus KT112-7	pRHWK1	GYB82_RS35695	K00529	3e-125	3-phenylpropionate/trans-cinnamate dioxygenase ferredoxin reductase component [EC:1.18.1.3]
Rhodococcus opacus KT112-7	pRHWK1	GYB82_RS35700	K18087	3.1e-54	biphenyl 2,3-dioxygenase ferredoxin component
Rhodococcus opacus KT112-7	pRHWK1	GYB82_RS35700	K05710	1.4e-36	3-phenylpropionate/trans-cinnamate dioxygenase ferredoxin component
Rhodococcus opacus KT112-7	pRHWK1	GYB82_RS35705	K15750	6.7e-94	biphenyl 2,3-dioxygenase subunit beta [EC:1.14.12.18]
Rhodococcus opacus KT112-7	pRHWK1	GYB82_RS35705	K14749	2.9e-56	ethylbenzene dioxygenase subunit beta [EC:1.14.12.-]
Rhodococcus opacus KT112-7	pRHWK1	GYB82_RS35710	K08689	2.7e-276	biphenyl 2,3-dioxygenase subunit alpha [EC:1.14.12.18]
Rhodococcus opacus KT112-7	pRHWK1	GYB82_RS35725	K07492	3.3e-79	putative transposase
Rhodococcus opacus KT112-7	pRHWK1	GYB82_RS35735	K07171	1.7e-14	mRNA interferase MazF [EC:3.1.-.-]
Rhodococcus opacus KT112-7	pRHWK1	GYB82_RS35795	K06988	7.5e-65	8-hydroxy-5-deazaflavin:NADPH oxidoreductase [EC:1.5.1.40]
Rhodococcus opacus KT112-7	pRHWK1	GYB82_RS35825	K07486	1.5e-58	transposase
Rhodococcus opacus KT112-7	pRHWK1	GYB82_RS35850	K16137	2.8e-40	TetR/AcrR family transcriptional regulator, transcriptional repressor for nem operon
Rhodococcus opacus KT112-7	pRHWK1	GYB82_RS35865	K07090	2.4e-22	uncharacterized protein
Rhodococcus opacus KT112-7	pRHWK1	GYB82_RS35870	K03149	5.5e-53	thiazole synthase [EC:2.8.1.10]
Rhodococcus opacus KT112-7	pRHWK1	GYB82_RS35875	K04033	5.9e-43	AraC family transcriptional regulator, ethanolamine operon transcriptional activator
Rhodococcus opacus KT112-7	pRHWK1	GYB82_RS35920	K00435	2.5e-85	hydrogen peroxide-dependent heme synthase [EC:1.3.98.5]
Rhodococcus opacus KT112-7	pRHWK1	GYB82_RS35925	K13419	0	serine/threonine-protein kinase PknK [EC:2.7.11.1]
Rhodococcus opacus KT112-7	pRHWK1	GYB82_RS35925	K03556	1.1e-131	LuxR family transcriptional regulator, maltose regulon positive regulatory protein
Rhodococcus opacus KT112-7	pRHWK1	GYB82_RS35925	K12132	1.3e-80	eukaryotic-like serine/threonine-protein kinase [EC:2.7.11.1]
Rhodococcus opacus KT112-7	pRHWK1	GYB82_RS35930	K01666	3.7e-145	4-hydroxy 2-oxovalerate aldolase [EC:4.1.3.39]
Rhodococcus opacus KT112-7	pRHWK1	GYB82_RS35940	K02554	4e-100	2-keto-4-pentenoate hydratase [EC:4.2.1.80]
Rhodococcus opacus KT112-7	pRHWK1	GYB82_RS35955	K05548	1.4e-149	MFS transporter, AAHS family, benzoate transport protein
Rhodococcus opacus KT112-7	pRHWK1	GYB82_RS35970	K00119	1.5e-169	alcohol dehydrogenase (nicotinoprotein) [EC:1.1.99.36]
Rhodococcus opacus KT112-7	pRHWK1	GYB82_RS35985	K15977	5.4e-28	putative oxidoreductase
Rhodococcus opacus KT112-7	pRHWK1	GYB82_RS35990	K01644	1.1e-58	citrate lyase subunit beta / citryl-CoA lyase [EC:4.1.3.34]
Rhodococcus opacus KT112-7	pRHWK1	GYB82_RS36020	K07068	3.9e-15	uncharacterized protein
Rhodococcus opacus KT112-7	pRHWK1	GYB82_RS36025	K00626	7.2e-45	acetyl-CoA C-acetyltransferase [EC:2.3.1.9]
Rhodococcus opacus KT112-7	pRHWK1	GYB82_RS36040	K01607	5.1e-19	4-carboxymuconolactone decarboxylase [EC:4.1.1.44]
Rhodococcus opacus KT112-7	pRHWK1	GYB82_RS36045	K00249	7.9e-115	acyl-CoA dehydrogenase [EC:1.3.8.7]
Rhodococcus opacus KT112-7	pRHWK1	GYB82_RS36055	K02011	7.1e-115	iron(III) transport system permease protein
Rhodococcus opacus KT112-7	pRHWK1	GYB82_RS36060	K07225	5.9e-22	putative hemin transport protein
Rhodococcus opacus KT112-7	pRHWK1	GYB82_RS36065	K05799	8.2e-49	GntR family transcriptional regulator, transcriptional repressor for pyruvate dehydrogenase complex
Rhodococcus opacus KT112-7	pRHWK1	GYB82_RS36070	K11616	9.4e-127	malate:Na+ symporter
Rhodococcus opacus KT112-7	pRHWK1	GYB82_RS36075	K01703	1.4e-188	3-isopropylmalate/(R)-2-methylmalate dehydratase large subunit [EC:4.2.1.33 4.2.1.35]
Rhodococcus opacus KT112-7	pRHWK1	GYB82_RS36080	K01704	6.1e-78	3-isopropylmalate/(R)-2-methylmalate dehydratase small subunit [EC:4.2.1.33 4.2.1.35]
Rhodococcus opacus KT112-7	pRHWK1	GYB82_RS36115	K14519	5.9e-212	NADP-dependent aldehyde dehydrogenase [EC:1.2.1.4]
Rhodococcus opacus KT112-7	pRHWK1	GYB82_RS36120	K01796	1.1e-133	alpha-methylacyl-CoA racemase [EC:5.1.99.4]
Rhodococcus opacus KT112-7	pRHWK1	GYB82_RS36125	K00249	2.6e-105	acyl-CoA dehydrogenase [EC:1.3.8.7]
Rhodococcus opacus KT112-7	pRHWK1	GYB82_RS36140	K18581	8e-91	unsaturated chondroitin disaccharide hydrolase [EC:3.2.1.180]
Rhodococcus opacus KT112-7	pRHWK1	GYB82_RS36145	K21685	3.2e-38	LuxR family transcriptional regulator, regulator of acetate metabolism
Rhodococcus opacus KT112-7	pRHWK1	GYB82_RS36155	K08172	3.1e-164	MFS transporter, MHS family, shikimate and dehydroshikimate transport protein
Rhodococcus opacus KT112-7	pRHWK1	GYB82_RS36165	K18256	2.2e-100	3,4-dihydroxyphthalate decarboxylase [EC:4.1.1.69]
Rhodococcus opacus KT112-7	pRHWK1	GYB82_RS36170	K00529	2.7e-133	3-phenylpropionate/trans-cinnamate dioxygenase ferredoxin reductase component [EC:1.18.1.3]
Rhodococcus opacus KT112-7	pRHWK1	GYB82_RS36175	K05337	1.6e-12	ferredoxin
Rhodococcus opacus KT112-7	pRHWK1	GYB82_RS36205	K13995	3.3e-87	maleamate amidohydrolase [EC:3.5.1.107]
Rhodococcus opacus KT112-7	pRHWK1	GYB82_RS36210	K02050	1.4e-45	NitT/TauT family transport system permease protein
Rhodococcus opacus KT112-7	pRHWK1	GYB82_RS36220	K02049	2e-111	NitT/TauT family transport system ATP-binding protein
Rhodococcus opacus KT112-7	pRHWK1	GYB82_RS36235	K02624	6.4e-88	IclR family transcriptional regulator, pca regulon regulatory protein
Rhodococcus opacus KT112-7	pRHWK1	GYB82_RS36240	K16319	3.8e-169	anthranilate 1,2-dioxygenase large subunit [EC:1.14.12.1]
Rhodococcus opacus KT112-7	pRHWK1	GYB82_RS36245	K16320	2.5e-59	anthranilate 1,2-dioxygenase small subunit [EC:1.14.12.1]
Rhodococcus opacus KT112-7	pRHWK1	GYB82_RS36255	K00523	4.5e-128	CDP-4-dehydro-6-deoxyglucose reductase, E3 [EC:1.17.1.1]
Rhodococcus opacus KT112-7	pRHWK1	GYB82_RS36270	K01607	4.1e-06	4-carboxymuconolactone decarboxylase [EC:4.1.1.44]
Rhodococcus opacus KT112-7	pRHWK1	GYB82_RS36290	K04043	1.1e-259	molecular chaperone DnaK
Rhodococcus opacus KT112-7	pRHWK1	GYB82_RS36295	K03687	1.6e-44	molecular chaperone GrpE
Rhodococcus opacus KT112-7	pRHWK1	GYB82_RS36300	K05516	5.5e-118	curved DNA-binding protein
Rhodococcus opacus KT112-7	pRHWK1	GYB82_RS36305	K18997	4.6e-27	chaperone modulatory protein CbpM
Rhodococcus opacus KT112-7	pRHWK1	GYB82_RS36310	K03695	0	ATP-dependent Clp protease ATP-binding subunit ClpB
Rhodococcus opacus KT112-7	pRHWK1	GYB82_RS36315	K03672	3.4e-55	thioredoxin 2 [EC:1.8.1.8]
Rhodococcus opacus KT112-7	pRHWK1	GYB82_RS36315	K03671	2.1e-36	thioredoxin 1
Rhodococcus opacus KT112-7	pRHWK1	GYB82_RS36325	K00384	1.3e-104	thioredoxin reductase (NADPH) [EC:1.8.1.9]
Rhodococcus opacus KT112-7	pRHWK1	GYB82_RS36365	K23948	2.5e-151	NADH:quinone reductase (non-electrogenic) [EC:1.6.5.9]
Rhodococcus opacus KT112-7	pRHWK1	GYB82_RS36365	K00459	2.9e-70	nitronate monooxygenase [EC:1.13.12.16]
Rhodococcus opacus KT112-7	pRHWK1	GYB82_RS36385	K03426	7.1e-98	NAD+ diphosphatase [EC:3.6.1.22]
Rhodococcus opacus KT112-7	pRHWK1	GYB82_RS36400	K01066	5.7e-103	acetyl esterase [EC:3.1.1.-]
Rhodococcus opacus KT112-7	pRHWK1	GYB82_RS36430	K15866	2.1e-87	2-(1,2-epoxy-1,2-dihydrophenyl)acetyl-CoA isomerase [EC:5.3.3.18]
Rhodococcus opacus KT112-7	pRHWK1	GYB82_RS36430	K01692	3.6e-71	enoyl-CoA hydratase [EC:4.2.1.17]
Rhodococcus opacus KT112-7	pRHWK1	GYB82_RS36435	K14731	1.6e-90	epsilon-lactone hydrolase [EC:3.1.1.83]
Rhodococcus opacus KT112-7	pRHWK1	GYB82_RS36445	K22187	5e-176	alpha-ketoglutaric semialdehyde dehydrogenase [EC:1.2.1.-]
Rhodococcus opacus KT112-7	pRHWK1	GYB82_RS36450	K09780	8.8e-19	uncharacterized protein
Rhodococcus opacus KT112-7	pRHWK1	GYB82_RS36515	K03462	3.9e-164	nicotinamide phosphoribosyltransferase [EC:2.4.2.12]
Rhodococcus opacus KT112-7	pRHWK1	GYB82_RS36525	K07492	6.7e-53	putative transposase
Rhodococcus opacus KT112-7	pRHWK1	GYB82_RS36530	K24998	7.5e-222	dehydro coenzyme F420 reductase / coenzyme F420-0:L-glutamate ligase / coenzyme F420-1:gamma-L-glutamate ligase [EC:1.3.8.17 6.3.2.31 6.3.2.34]
Rhodococcus opacus KT112-7	pRHWK1	GYB82_RS36530	K12234	1.9e-99	coenzyme F420-0:L-glutamate ligase / coenzyme F420-1:gamma-L-glutamate ligase [EC:6.3.2.31 6.3.2.34]
Rhodococcus opacus KT112-7	pRHWK1	GYB82_RS36535	K14941	1e-68	2-phospho-L-lactate/phosphoenolpyruvate guanylyltransferase [EC:2.7.7.68 2.7.7.105]
Rhodococcus opacus KT112-7	pRHWK1	GYB82_RS36540	K01057	5.3e-79	6-phosphogluconolactonase [EC:3.1.1.31]
Rhodococcus opacus KT112-7	pRHWK1	GYB82_RS36545	K11779	0	FO synthase [EC:2.5.1.147 4.3.1.32]
Rhodococcus opacus KT112-7	pRHWK1	GYB82_RS36550	K00948	4.7e-120	ribose-phosphate pyrophosphokinase [EC:2.7.6.1]
Rhodococcus opacus KT112-7	pRHWK1	GYB82_RS36555	K01239	1.7e-94	purine nucleosidase [EC:3.2.2.1]
Rhodococcus opacus KT112-7	pRHWK1	GYB82_RS36565	K22187	1.6e-178	alpha-ketoglutaric semialdehyde dehydrogenase [EC:1.2.1.-]
Rhodococcus opacus KT112-7	pRHWK1	GYB82_RS36595	K01904	2.3e-184	4-coumarate--CoA ligase [EC:6.2.1.12]
Rhodococcus opacus KT112-7	pRHWK1	GYB82_RS36625	K14060	1.6e-46	putative DNA-invertase from lambdoid prophage Rac
Rhodococcus opacus KT112-7	pRHWK1	GYB82_RS36635	K07675	4.1e-77	two-component system, NarL family, sensor histidine kinase UhpB [EC:2.7.13.3]
Rhodococcus opacus KT112-7	pRHWK1	GYB82_RS36645	K09118	0	uncharacterized protein
Rhodococcus opacus KT112-7	pRHWK1	GYB82_RS36655	K03699	1.2e-146	putative hemolysin
Rhodococcus opacus KT112-7	pRHWK1	GYB82_RS36700	K18009	5.5e-97	meso-butanediol dehydrogenase / (S,S)-butanediol dehydrogenase / diacetyl reductase [EC:1.1.1.- 1.1.1.76 1.1.1.304]
Rhodococcus opacus KT112-7	pRHWK1	GYB82_RS36700	K00059	7.1e-84	3-oxoacyl-[acyl-carrier protein] reductase [EC:1.1.1.100]
Rhodococcus opacus KT112-7	pRHWK1	GYB82_RS36710	K01966	1.4e-266	propionyl-CoA carboxylase beta chain [EC:6.4.1.3 2.1.3.15]
Rhodococcus opacus KT112-7	pRHWK1	GYB82_RS36720	K07494	2.3e-33	putative transposase
Rhodococcus opacus KT112-7	pRHWK1	GYB82_RS36795	K14733	1.3e-151	limonene 1,2-monooxygenase [EC:1.14.13.107]
Rhodococcus opacus KT112-7	pRHWK1	GYB82_RS36800	K06893	8.2e-17	uncharacterized protein
Rhodococcus opacus KT112-7	pRHWK1	GYB82_RS36835	K01999	4.1e-65	branched-chain amino acid transport system substrate-binding protein
Rhodococcus opacus KT112-7	pRHWK1	GYB82_RS36845	K01998	5.4e-72	branched-chain amino acid transport system permease protein
Rhodococcus opacus KT112-7	pRHWK1	GYB82_RS36845	K07225	1.8e-23	putative hemin transport protein
Rhodococcus opacus KT112-7	pRHWK1	GYB82_RS36850	K01997	7.7e-77	branched-chain amino acid transport system permease protein
Rhodococcus opacus KT112-7	pRHWK1	GYB82_RS36860	K08282	1.2e-87	non-specific serine/threonine protein kinase [EC:2.7.11.1]
Rhodococcus opacus KT112-7	pRHWK1	GYB82_RS36860	K12132	6.8e-81	eukaryotic-like serine/threonine-protein kinase [EC:2.7.11.1]
Rhodococcus opacus KT112-7	pRHWK1	GYB82_RS36940	K02039	8.7e-58	phosphate transport system protein
Rhodococcus opacus KT112-7	pRHWK2	GYB82_RS37005	K03496	1e-43	chromosome partitioning protein
Rhodococcus opacus KT112-7	pRHWK2	GYB82_RS37080	K03466	2e-19	DNA segregation ATPase FtsK/SpoIIIE, S-DNA-T family
Rhodococcus opacus KT112-7	pRHWK2	GYB82_RS37115	K01055	3e-61	3-oxoadipate enol-lactonase [EC:3.1.1.24]
Rhodococcus opacus KT112-7	pRHWK2	GYB82_RS37195	K07052	6.5e-11	CAAX protease family protein
Rhodococcus opacus KT112-7	pRHWK2	GYB82_RS37295	K18955	1.8e-32	WhiB family transcriptional regulator, redox-sensing transcriptional regulator
Rhodococcus opacus KT112-7	pRHWK2	GYB82_RS37415	K07486	9.1e-59	transposase
Rhodococcus opacus 1CP	pR1CP1	R1CP_RS34895	K09946	5.2e-16	uncharacterized protein
Rhodococcus opacus 1CP	pR1CP1	R1CP_RS34920	K07459	3.3e-107	putative ATP-dependent endonuclease of the OLD family
Rhodococcus opacus 1CP	pR1CP1	R1CP_RS34930	K18831	1.4e-12	HTH-type transcriptional regulator / antitoxin HigA
Rhodococcus opacus 1CP	pR1CP1	R1CP_RS34965	K09946	1.8e-16	uncharacterized protein
Rhodococcus opacus 1CP	pR1CP1	R1CP_RS34990	K07483	1e-15	transposase
Rhodococcus opacus 1CP	pR1CP1	R1CP_RS34995	K07486	2.1e-52	transposase
Rhodococcus opacus 1CP	pR1CP1	R1CP_RS35000	K07497	9.2e-29	putative transposase
Rhodococcus opacus 1CP	pR1CP1	R1CP_RS35000	K09958	1.1e-16	uncharacterized protein
Rhodococcus opacus 1CP	pR1CP1	R1CP_RS35005	K04763	6.5e-66	integrase/recombinase XerD
Rhodococcus opacus 1CP	pR1CP1	R1CP_RS35020	K07497	2.2e-10	putative transposase
Rhodococcus opacus 1CP	pR1CP1	R1CP_RS40215	K07496	6.4e-10	putative transposase
Rhodococcus opacus 1CP	pR1CP1	R1CP_RS35025	K07491	1.2e-18	REP-associated tyrosine transposase
Rhodococcus opacus 1CP	pR1CP1	R1CP_RS35080	K11530	1.1e-35	(4S)-4-hydroxy-5-phosphonooxypentane-2,3-dione isomerase [EC:5.3.1.32]
Rhodococcus opacus 1CP	pR1CP1	R1CP_RS35100	K07404	5.4e-107	6-phosphogluconolactonase [EC:3.1.1.31]
Rhodococcus opacus 1CP	pR1CP1	R1CP_RS35105	K01644	1.4e-72	citrate lyase subunit beta / citryl-CoA lyase [EC:4.1.3.34]
Rhodococcus opacus 1CP	pR1CP1	R1CP_RS35115	K03300	6.2e-189	citrate-Mg2+:H+ or citrate-Ca2+:H+ symporter, CitMHS family
Rhodococcus opacus 1CP	pR1CP1	R1CP_RS35130	K07486	1.3e-49	transposase
Rhodococcus opacus 1CP	pR1CP1	R1CP_RS35135	K07483	1.7e-19	transposase
Rhodococcus opacus 1CP	pR1CP1	R1CP_RS35140	K07497	1.6e-42	putative transposase
Rhodococcus opacus 1CP	pR1CP1	R1CP_RS35145	K07493	3.3e-83	putative transposase
Rhodococcus opacus 1CP	pR1CP1	R1CP_RS35165	K07493	3.3e-83	putative transposase
Rhodococcus opacus 1CP	pR1CP1	R1CP_RS40240	K07493	2.8e-88	putative transposase
Rhodococcus opacus 1CP	pR1CP1	R1CP_RS35195	K07493	1e-32	putative transposase
Rhodococcus opacus 1CP	pR1CP1	R1CP_RS35240	K07486	7.9e-31	transposase
Rhodococcus opacus 1CP	pR1CP1	R1CP_RS35280	K01666	3.4e-129	4-hydroxy 2-oxovalerate aldolase [EC:4.1.3.39]
Rhodococcus opacus 1CP	pR1CP1	R1CP_RS35285	K01617	5e-100	2-oxo-3-hexenedioate decarboxylase [EC:4.1.1.77]
Rhodococcus opacus 1CP	pR1CP1	R1CP_RS35325	K07493	2.7e-185	putative transposase
Rhodococcus opacus 1CP	pR1CP1	R1CP_RS35345	K05792	1.5e-83	tellurite resistance protein TerA
Rhodococcus opacus 1CP	pR1CP1	R1CP_RS35395	K22297	2.6e-71	Fur family transcriptional regulator, stress-responsive regulator
Rhodococcus opacus 1CP	pR1CP1	R1CP_RS35400	K03782	0	catalase-peroxidase [EC:1.11.1.21]
Rhodococcus opacus 1CP	pR1CP1	R1CP_RS35405	K08282	2e-82	non-specific serine/threonine protein kinase [EC:2.7.11.1]
Rhodococcus opacus 1CP	pR1CP1	R1CP_RS35405	K12132	6e-79	eukaryotic-like serine/threonine-protein kinase [EC:2.7.11.1]
Rhodococcus opacus 1CP	pR1CP1	R1CP_RS35415	K03827	1.4e-54	putative acetyltransferase [EC:2.3.1.-]
Rhodococcus opacus 1CP	pR1CP1	R1CP_RS35440	K00626	1.4e-127	acetyl-CoA C-acetyltransferase [EC:2.3.1.9]
Rhodococcus opacus 1CP	pR1CP1	R1CP_RS35460	K00529	2.9e-145	3-phenylpropionate/trans-cinnamate dioxygenase ferredoxin reductase component [EC:1.18.1.3]
Rhodococcus opacus 1CP	pR1CP1	R1CP_RS35470	K01574	1e-44	acetoacetate decarboxylase [EC:4.1.1.4]
Rhodococcus opacus 1CP	pR1CP1	R1CP_RS35475	K22108	1.4e-40	TetR/AcrR family transcriptional regulator, cholesterol catabolism regulator
Rhodococcus opacus 1CP	pR1CP1	R1CP_RS35520	K07493	3.3e-83	putative transposase
Rhodococcus opacus 1CP	pR1CP1	R1CP_RS35535	K06995	3.5e-21	uncharacterized protein
Rhodococcus opacus 1CP	pR1CP1	R1CP_RS35540	K00059	1.7e-82	3-oxoacyl-[acyl-carrier protein] reductase [EC:1.1.1.100]
Rhodococcus opacus 1CP	pR1CP1	R1CP_RS35555	K01273	1.6e-62	membrane dipeptidase [EC:3.4.13.19]
Rhodococcus opacus 1CP	pR1CP1	R1CP_RS35560	K03464	2.9e-21	muconolactone D-isomerase [EC:5.3.3.4]
Rhodococcus opacus 1CP	pR1CP1	R1CP_RS35570	K00324	7.4e-152	H+-translocating NAD(P) transhydrogenase subunit alpha [EC:1.6.1.2 7.1.1.1]
Rhodococcus opacus 1CP	pR1CP1	R1CP_RS35580	K00325	2.7e-194	H+-translocating NAD(P) transhydrogenase subunit beta [EC:1.6.1.2 7.1.1.1]
Rhodococcus opacus 1CP	pR1CP1	R1CP_RS35590	K03297	7.7e-34	small multidrug resistance pump
Rhodococcus opacus 1CP	pR1CP1	R1CP_RS35595	K03297	1.1e-30	small multidrug resistance pump
Rhodococcus opacus 1CP	pR1CP1	R1CP_RS35620	K07090	6.1e-22	uncharacterized protein
Rhodococcus opacus 1CP	pR1CP1	R1CP_RS35640	K14520	9.5e-229	4-hydroxyacetophenone monooxygenase [EC:1.14.13.84]
Rhodococcus opacus 1CP	pR1CP1	R1CP_RS35655	K00389	2.2e-34	putative membrane protein
Rhodococcus opacus 1CP	pR1CP1	R1CP_RS35670	K07486	8.5e-51	transposase
Rhodococcus opacus 1CP	pR1CP1	R1CP_RS35690	K01915	9.1e-60	glutamine synthetase [EC:6.3.1.2]
Rhodococcus opacus 1CP	pR1CP1	R1CP_RS35695	K07010	1.3e-64	putative glutamine amidotransferase
Rhodococcus opacus 1CP	pR1CP1	R1CP_RS35710	K03644	3.7e-132	lipoyl synthase [EC:2.8.1.8]
Rhodococcus opacus 1CP	pR1CP1	R1CP_RS35725	K21417	2.2e-146	acetoin:2,6-dichlorophenolindophenol oxidoreductase subunit beta [EC:1.1.1.-]
Rhodococcus opacus 1CP	pR1CP1	R1CP_RS40340	K01426	8.6e-96	amidase [EC:3.5.1.4]
Rhodococcus opacus 1CP	pR1CP1	R1CP_RS35795	K07010	4.9e-66	putative glutamine amidotransferase
Rhodococcus opacus 1CP	pR1CP1	R1CP_RS35800	K01425	3e-84	glutaminase [EC:3.5.1.2]
Rhodococcus opacus 1CP	pR1CP1	R1CP_RS35815	K05799	2.2e-54	GntR family transcriptional regulator, transcriptional repressor for pyruvate dehydrogenase complex
Rhodococcus opacus 1CP	pR1CP1	R1CP_RS35840	K01915	1.9e-58	glutamine synthetase [EC:6.3.1.2]
Rhodococcus opacus 1CP	pR1CP1	R1CP_RS35845	K01915	2e-62	glutamine synthetase [EC:6.3.1.2]
Rhodococcus opacus 1CP	pR1CP1	R1CP_RS35850	K01066	1.2e-92	acetyl esterase [EC:3.1.1.-]
Rhodococcus opacus 1CP	pR1CP1	R1CP_RS35865	K01895	2.3e-299	acetyl-CoA synthetase [EC:6.2.1.1]
Rhodococcus opacus 1CP	pR1CP1	R1CP_RS35880	K01895	4e-299	acetyl-CoA synthetase [EC:6.2.1.1]
Rhodococcus opacus 1CP	pR1CP1	R1CP_RS35885	K07493	6.2e-43	putative transposase
Rhodococcus opacus 1CP	pR1CP1	R1CP_RS35895	K07493	1e-32	putative transposase
Rhodococcus opacus 1CP	pR1CP1	R1CP_RS35900	K07222	8.1e-108	putative flavoprotein involved in K+ transport
Rhodococcus opacus 1CP	pR1CP1	R1CP_RS35905	K09022	2e-24	2-iminobutanoate/2-iminopropanoate deaminase [EC:3.5.99.10]
Rhodococcus opacus 1CP	pR1CP1	R1CP_RS35910	K01066	4.6e-109	acetyl esterase [EC:3.1.1.-]
Rhodococcus opacus 1CP	pR1CP1	R1CP_RS40355	K04033	1.6e-44	AraC family transcriptional regulator, ethanolamine operon transcriptional activator
Rhodococcus opacus 1CP	pR1CP1	R1CP_RS35935	K07493	1e-32	putative transposase
Rhodococcus opacus 1CP	pR1CP1	R1CP_RS35945	K07493	5.9e-43	putative transposase
Rhodococcus opacus 1CP	pR1CP1	R1CP_RS35960	K03704	4.3e-27	cold shock protein
Rhodococcus opacus 1CP	pR1CP1	R1CP_RS35975	K13993	2.3e-32	HSP20 family protein
Rhodococcus opacus 1CP	pR1CP1	R1CP_RS35985	K07682	3.9e-178	two-component system, NarL family, sensor histidine kinase DevS [EC:2.7.13.3]
Rhodococcus opacus 1CP	pR1CP1	R1CP_RS36000	K07493	2.7e-185	putative transposase
Rhodococcus opacus 1CP	pR1CP1	R1CP_RS36010	K07100	6.3e-92	putative phosphoribosyl transferase
Rhodococcus opacus 1CP	pR1CP1	R1CP_RS36015	K00948	3.5e-86	ribose-phosphate pyrophosphokinase [EC:2.7.6.1]
Rhodococcus opacus 1CP	pR1CP1	R1CP_RS36035	K07682	4.9e-155	two-component system, NarL family, sensor histidine kinase DevS [EC:2.7.13.3]
Rhodococcus opacus 1CP	pR1CP1	R1CP_RS36065	K16267	2.4e-62	zinc and cadmium transporter
Rhodococcus opacus 1CP	pR1CP1	R1CP_RS36070	K01142	6e-86	exodeoxyribonuclease III [EC:3.1.11.2]
Rhodococcus opacus 1CP	pR1CP1	R1CP_RS36085	K07497	4.9e-33	putative transposase
Rhodococcus opacus 1CP	pR1CP1	R1CP_RS36085	K07483	1.9e-12	transposase
Rhodococcus opacus 1CP	pR1CP1	R1CP_RS36095	K03455	3.8e-122	monovalent cation:H+ antiporter-2, CPA2 family
Rhodococcus opacus 1CP	pR1CP1	R1CP_RS36100	K09118	0	uncharacterized protein
Rhodococcus opacus 1CP	pR1CP1	R1CP_RS36105	K12953	0	cation-transporting P-type ATPase F [EC:7.2.2.-]
Rhodococcus opacus 1CP	pR1CP1	R1CP_RS36115	K03699	1.1e-149	putative hemolysin
Rhodococcus opacus 1CP	pR1CP1	R1CP_RS36145	K05794	2e-143	tellurite resistance protein TerC
Rhodococcus opacus 1CP	pR1CP1	R1CP_RS36210	K03497	1.2e-34	ParB family transcriptional regulator, chromosome partitioning protein
Rhodococcus opacus 1CP	pR1CP1	R1CP_RS36280	K22463	1.3e-86	2-oxo-3-(phosphooxy)propyl 3-oxoalkanoate synthase [EC:2.3.1.277]
Rhodococcus opacus 1CP	pR1CP1	R1CP_RS36285	K07499	4.9e-27	putative transposase
Rhodococcus opacus 1CP	pR1CP1	R1CP_RS36285	K07494	7.8e-15	putative transposase
Rhodococcus opacus 1CP	pR1CP1	R1CP_RS36310	K01971	2.4e-72	bifunctional non-homologous end joining protein LigD [EC:6.5.1.1]
Rhodococcus opacus 1CP	pR1CP1	R1CP_RS36330	K01939	2.9e-70	adenylosuccinate synthase [EC:6.3.4.4]
Rhodococcus opacus 1CP	pR1CP1	R1CP_RS41395	K07492	2.2e-42	putative transposase
Rhodococcus opacus 1CP	pR1CP1	R1CP_RS36375	K08172	5e-159	MFS transporter, MHS family, shikimate and dehydroshikimate transport protein
Rhodococcus opacus 1CP	pR1CP1	R1CP_RS36385	K01426	3.6e-80	amidase [EC:3.5.1.4]
Rhodococcus opacus 1CP	pR1CP1	R1CP_RS36395	K07546	5.6e-94	E-phenylitaconyl-CoA hydratase [EC:4.2.1.-]
Rhodococcus opacus 1CP	pR1CP1	R1CP_RS36485	K05799	2.4e-41	GntR family transcriptional regulator, transcriptional repressor for pyruvate dehydrogenase complex
Rhodococcus opacus 1CP	pR1CP1	R1CP_RS36500	K02106	1.6e-151	short-chain fatty acids transporter
Rhodococcus opacus 1CP	pR1CP1	R1CP_RS36510	K00318	3.4e-73	proline dehydrogenase [EC:1.5.5.2]
Rhodococcus opacus 1CP	pR1CP1	R1CP_RS36515	K00294	1.6e-255	1-pyrroline-5-carboxylate dehydrogenase [EC:1.2.1.88]
Rhodococcus opacus 1CP	pR1CP1	R1CP_RS36525	K15371	0	glutamate dehydrogenase [EC:1.4.1.2]
Rhodococcus opacus 1CP	pR1CP1	R1CP_RS36540	K08369	4.4e-156	MFS transporter, putative metabolite:H+ symporter
Rhodococcus opacus 1CP	pR1CP1	R1CP_RS36565	K07493	3.3e-83	putative transposase
Rhodococcus opacus 1CP	pR1CP1	R1CP_RS40460	K08282	1.3e-82	non-specific serine/threonine protein kinase [EC:2.7.11.1]
Rhodococcus opacus 1CP	pR1CP1	R1CP_RS40460	K12132	7.5e-82	eukaryotic-like serine/threonine-protein kinase [EC:2.7.11.1]
Rhodococcus opacus 1CP	pR1CP1	R1CP_RS36580	K07493	2.7e-185	putative transposase
Rhodococcus opacus 1CP	pR1CP1	R1CP_RS36705	K03466	1.5e-25	DNA segregation ATPase FtsK/SpoIIIE, S-DNA-T family
Rhodococcus opacus 1CP	pR1CP1	R1CP_RS36770	K10680	5.2e-163	N-ethylmaleimide reductase [EC:1.-.-.-]
Rhodococcus opacus 1CP	pR1CP1	R1CP_RS36800	K02030	2.4e-40	polar amino acid transport system substrate-binding protein
Rhodococcus opacus 1CP	pR1CP1	R1CP_RS36805	K01915	8.1e-51	glutamine synthetase [EC:6.3.1.2]
Rhodococcus opacus 1CP	pR1CP1	R1CP_RS36820	K23463	2.2e-221	(Z)-2-((N-methylformamido)methylene)-5-hydroxybutyrolactone dehydrogenase [EC:1.2.1.-]
Rhodococcus opacus 1CP	pR1CP1	R1CP_RS36820	K00128	2.1e-179	aldehyde dehydrogenase (NAD+) [EC:1.2.1.3]
Rhodococcus opacus 1CP	pR1CP1	R1CP_RS36825	K07010	4.2e-75	putative glutamine amidotransferase
Rhodococcus opacus 1CP	pR1CP1	R1CP_RS36830	K05337	1.9e-18	ferredoxin
Rhodococcus opacus 1CP	pR1CP1	R1CP_RS36835	K00529	3.5e-119	3-phenylpropionate/trans-cinnamate dioxygenase ferredoxin reductase component [EC:1.18.1.3]
Rhodococcus opacus 1CP	pR1CP1	R1CP_RS36840	K00259	6.2e-171	alanine dehydrogenase [EC:1.4.1.1]
Rhodococcus opacus 1CP	pR1CP1	R1CP_RS36875	K01692	6.7e-69	enoyl-CoA hydratase [EC:4.2.1.17]
Rhodococcus opacus 1CP	pR1CP1	R1CP_RS36890	K05799	8.1e-50	GntR family transcriptional regulator, transcriptional repressor for pyruvate dehydrogenase complex
Rhodococcus opacus 1CP	pR1CP1	R1CP_RS36905	K00249	1.2e-108	acyl-CoA dehydrogenase [EC:1.3.8.7]
Rhodococcus opacus 1CP	pR1CP1	R1CP_RS36910	K08282	8.8e-90	non-specific serine/threonine protein kinase [EC:2.7.11.1]
Rhodococcus opacus 1CP	pR1CP1	R1CP_RS36910	K12132	4.4e-81	eukaryotic-like serine/threonine-protein kinase [EC:2.7.11.1]
Rhodococcus opacus 1CP	pR1CP1	R1CP_RS36955	K08172	1.1e-152	MFS transporter, MHS family, shikimate and dehydroshikimate transport protein
Rhodococcus opacus 1CP	pR1CP1	R1CP_RS36960	K15020	2.3e-97	acryloyl-coenzyme A reductase [EC:1.3.1.84]
Rhodococcus opacus 1CP	pR1CP1	R1CP_RS36960	K00344	8.8e-86	NADPH:quinone reductase [EC:1.6.5.5]
Rhodococcus opacus 1CP	pR1CP1	R1CP_RS36965	K07068	7e-27	uncharacterized protein
Rhodococcus opacus 1CP	pR1CP1	R1CP_RS36970	K00626	3.4e-53	acetyl-CoA C-acetyltransferase [EC:2.3.1.9]
Rhodococcus opacus 1CP	pR1CP1	R1CP_RS36980	K00059	9.3e-88	3-oxoacyl-[acyl-carrier protein] reductase [EC:1.1.1.100]
Rhodococcus opacus 1CP	pR1CP1	R1CP_RS36990	K01796	1.6e-156	alpha-methylacyl-CoA racemase [EC:5.1.99.4]
Rhodococcus opacus 1CP	pR1CP1	R1CP_RS37010	K00135	4.1e-213	succinate-semialdehyde dehydrogenase / glutarate-semialdehyde dehydrogenase [EC:1.2.1.16 1.2.1.79 1.2.1.20]
Rhodococcus opacus 1CP	pR1CP1	R1CP_RS37025	K08282	5.1e-89	non-specific serine/threonine protein kinase [EC:2.7.11.1]
Rhodococcus opacus 1CP	pR1CP1	R1CP_RS37025	K12132	1.5e-80	eukaryotic-like serine/threonine-protein kinase [EC:2.7.11.1]
Rhodococcus opacus 1CP	pR1CP1	R1CP_RS41425	K07492	1.6e-78	putative transposase
Rhodococcus opacus 1CP	pR1CP1	R1CP_RS37045	K01061	2.3e-44	carboxymethylenebutenolidase [EC:3.1.1.45]
Rhodococcus opacus 1CP	pR1CP1	R1CP_RS37065	K01856	2.9e-128	muconate cycloisomerase [EC:5.5.1.1]
Rhodococcus opacus 1CP	pR1CP1	R1CP_RS37070	K07495	3.1e-36	putative transposase
Rhodococcus opacus 1CP	pR1CP1	R1CP_RS43080	K07486	4.9e-35	transposase
Rhodococcus opacus 1CP	pR1CP1	R1CP_RS37090	K00217	2.9e-121	maleylacetate reductase [EC:1.3.1.32]
Rhodococcus opacus 1CP	pR1CP1	R1CP_RS37100	K07486	3.9e-60	transposase
Rhodococcus opacus 1CP	pR1CP1	R1CP_RS37115	K07727	5.1e-13	putative transcriptional regulator
Rhodococcus opacus 1CP	pR1CP1	R1CP_RS37130	K00027	7.1e-161	malate dehydrogenase (oxaloacetate-decarboxylating) [EC:1.1.1.38]
Rhodococcus opacus 1CP	pR1CP1	R1CP_RS37185	K07497	3.9e-38	putative transposase
Rhodococcus opacus 1CP	pR1CP1	R1CP_RS37185	K07483	1.3e-15	transposase
Rhodococcus opacus 1CP	pR1CP1	R1CP_RS37205	K07486	3.9e-32	transposase
Rhodococcus opacus 1CP	pR1CP1	R1CP_RS37220	K04098	7.7e-111	hydroxyquinol 1,2-dioxygenase [EC:1.13.11.37]
Rhodococcus opacus 1CP	pR1CP1	R1CP_RS40530	K07492	1.1e-24	putative transposase
Rhodococcus opacus 1CP	pR1CP1	R1CP_RS37225	K07486	3.9e-32	transposase
Rhodococcus opacus 1CP	pR1CP1	R1CP_RS37230	K07492	2.9e-29	putative transposase
Rhodococcus opacus 1CP	pR1CP1	R1CP_RS40535	K11753	1.9e-50	riboflavin kinase / FMN adenylyltransferase [EC:2.7.1.26 2.7.7.2]
Rhodococcus opacus 1CP	pR1CP1	R1CP_RS40540	K00217	2.9e-136	maleylacetate reductase [EC:1.3.1.32]
Rhodococcus opacus 1CP	pR1CP1	R1CP_RS40550	K18955	3.3e-24	WhiB family transcriptional regulator, redox-sensing transcriptional regulator
Rhodococcus opacus 1CP	pR1CP1	R1CP_RS40560	K03556	1.8e-61	LuxR family transcriptional regulator, maltose regulon positive regulatory protein
Rhodococcus opacus 1CP	pR1CP1	R1CP_RS37260	K03556	5.2e-47	LuxR family transcriptional regulator, maltose regulon positive regulatory protein
Rhodococcus opacus 1CP	pR1CP1	R1CP_RS37275	K07493	3.3e-83	putative transposase
Rhodococcus opacus 1CP	pR1CP1	R1CP_RS37280	K00020	2.5e-77	3-hydroxyisobutyrate dehydrogenase [EC:1.1.1.31]
Rhodococcus opacus 1CP	pR1CP1	R1CP_RS37285	K07497	7.5e-07	putative transposase
Rhodococcus opacus 1CP	pR1CP1	R1CP_RS37290	K04763	7.2e-65	integrase/recombinase XerD
Rhodococcus opacus 1CP	pR1CP1	R1CP_RS37305	K07497	2.1e-10	putative transposase
Rhodococcus opacus 1CP	pR1CP1	R1CP_RS37330	K11381	1.1e-206	2-oxoisovalerate dehydrogenase E1 component [EC:1.2.4.4]
Rhodococcus opacus 1CP	pR1CP1	R1CP_RS37340	K07494	5.4e-31	putative transposase
Rhodococcus opacus 1CP	pR1CP1	R1CP_RS37350	K07493	3.3e-83	putative transposase
Rhodococcus opacus 1CP	pR1CP1	R1CP_RS37360	K00135	5.7e-202	succinate-semialdehyde dehydrogenase / glutarate-semialdehyde dehydrogenase [EC:1.2.1.16 1.2.1.79 1.2.1.20]
Rhodococcus opacus 1CP	pR1CP1	R1CP_RS37365	K00382	6.6e-151	dihydrolipoamide dehydrogenase [EC:1.8.1.4]
Rhodococcus opacus 1CP	pR1CP1	R1CP_RS37370	K07393	1.5e-142	glutathionyl-hydroquinone reductase [EC:1.8.5.7]
Rhodococcus opacus 1CP	pR1CP1	R1CP_RS37375	K07492	3.4e-65	putative transposase
Rhodococcus opacus 1CP	pR1CP1	R1CP_RS37380	K07494	1.9e-33	putative transposase
Rhodococcus opacus 1CP	pR1CP1	R1CP_RS42065	K03342	3e-203	para-aminobenzoate synthetase / 4-amino-4-deoxychorismate lyase [EC:2.6.1.85 4.1.3.38]
Rhodococcus opacus 1CP	pR1CP1	R1CP_RS37390	K07492	1.8e-23	putative transposase
Rhodococcus opacus 1CP	pR1CP1	R1CP_RS37395	K07483	7.3e-19	transposase
Rhodococcus opacus 1CP	pR1CP1	R1CP_RS37405	K15066	1e-175	vanillate/3-O-methylgallate O-demethylase [EC:2.1.1.341]
Rhodococcus opacus 1CP	pR1CP1	R1CP_RS37410	K01433	1.5e-140	formyltetrahydrofolate deformylase [EC:3.5.1.10]
Rhodococcus opacus 1CP	pR1CP1	R1CP_RS40580	K00796	4.1e-118	dihydropteroate synthase [EC:2.5.1.15]
Rhodococcus opacus 1CP	pR1CP1	R1CP_RS41435	K07492	1.6e-78	putative transposase
Rhodococcus opacus 1CP	pR1CP1	R1CP_RS37430	K01061	2.3e-44	carboxymethylenebutenolidase [EC:3.1.1.45]
Rhodococcus opacus 1CP	pR1CP1	R1CP_RS37450	K01856	2.9e-128	muconate cycloisomerase [EC:5.5.1.1]
Rhodococcus opacus 1CP	pR1CP1	R1CP_RS37455	K07495	3.1e-36	putative transposase
Rhodococcus opacus 1CP	pR1CP1	R1CP_RS43100	K07486	4.9e-35	transposase
Rhodococcus opacus 1CP	pR1CP1	R1CP_RS37475	K00217	2.9e-121	maleylacetate reductase [EC:1.3.1.32]
Rhodococcus opacus 1CP	pR1CP1	R1CP_RS37485	K07486	3.9e-60	transposase
Rhodococcus opacus 1CP	pR1CP1	R1CP_RS37500	K07727	5.1e-13	putative transcriptional regulator
Rhodococcus opacus 1CP	pR1CP1	R1CP_RS37515	K00027	7.1e-161	malate dehydrogenase (oxaloacetate-decarboxylating) [EC:1.1.1.38]
Rhodococcus opacus 1CP	pR1CP1	R1CP_RS37570	K07497	3.9e-38	putative transposase
Rhodococcus opacus 1CP	pR1CP1	R1CP_RS37570	K07483	1.3e-15	transposase
Rhodococcus opacus 1CP	pR1CP1	R1CP_RS37590	K07486	3.9e-32	transposase
Rhodococcus opacus 1CP	pR1CP1	R1CP_RS37605	K04098	7.7e-111	hydroxyquinol 1,2-dioxygenase [EC:1.13.11.37]
Rhodococcus opacus 1CP	pR1CP1	R1CP_RS40615	K07492	1.1e-24	putative transposase
Rhodococcus opacus 1CP	pR1CP1	R1CP_RS37610	K07486	3.9e-32	transposase
Rhodococcus opacus 1CP	pR1CP1	R1CP_RS37615	K07492	2.9e-29	putative transposase
Rhodococcus opacus 1CP	pR1CP1	R1CP_RS40620	K11753	1.9e-50	riboflavin kinase / FMN adenylyltransferase [EC:2.7.1.26 2.7.7.2]
Rhodococcus opacus 1CP	pR1CP1	R1CP_RS40625	K00217	2.9e-136	maleylacetate reductase [EC:1.3.1.32]
Rhodococcus opacus 1CP	pR1CP1	R1CP_RS40635	K18955	3.3e-24	WhiB family transcriptional regulator, redox-sensing transcriptional regulator
Rhodococcus opacus 1CP	pR1CP1	R1CP_RS40645	K03556	1.8e-61	LuxR family transcriptional regulator, maltose regulon positive regulatory protein
Rhodococcus opacus 1CP	pR1CP1	R1CP_RS37645	K03556	5.2e-47	LuxR family transcriptional regulator, maltose regulon positive regulatory protein
Rhodococcus opacus 1CP	pR1CP1	R1CP_RS37660	K07493	3.3e-83	putative transposase
Rhodococcus opacus 1CP	pR1CP1	R1CP_RS37665	K00020	2.5e-77	3-hydroxyisobutyrate dehydrogenase [EC:1.1.1.31]
Rhodococcus opacus 1CP	pR1CP1	R1CP_RS37670	K07497	7.5e-07	putative transposase
Rhodococcus opacus 1CP	pR1CP1	R1CP_RS37675	K04763	7.2e-65	integrase/recombinase XerD
Rhodococcus opacus 1CP	pR1CP1	R1CP_RS37690	K07497	2.1e-10	putative transposase
Rhodococcus opacus 1CP	pR1CP1	R1CP_RS37715	K11381	1.1e-206	2-oxoisovalerate dehydrogenase E1 component [EC:1.2.4.4]
Rhodococcus opacus 1CP	pR1CP1	R1CP_RS37725	K07494	5.4e-31	putative transposase
Rhodococcus opacus 1CP	pR1CP1	R1CP_RS37735	K07493	3.3e-83	putative transposase
Rhodococcus opacus 1CP	pR1CP1	R1CP_RS37745	K00135	5.7e-202	succinate-semialdehyde dehydrogenase / glutarate-semialdehyde dehydrogenase [EC:1.2.1.16 1.2.1.79 1.2.1.20]
Rhodococcus opacus 1CP	pR1CP1	R1CP_RS37750	K00382	6.6e-151	dihydrolipoamide dehydrogenase [EC:1.8.1.4]
Rhodococcus opacus 1CP	pR1CP1	R1CP_RS37755	K07393	1.5e-142	glutathionyl-hydroquinone reductase [EC:1.8.5.7]
Rhodococcus opacus 1CP	pR1CP1	R1CP_RS37760	K07492	3.4e-65	putative transposase
Rhodococcus opacus 1CP	pR1CP1	R1CP_RS37765	K07494	1.9e-33	putative transposase
Rhodococcus opacus 1CP	pR1CP1	R1CP_RS42095	K03342	3e-203	para-aminobenzoate synthetase / 4-amino-4-deoxychorismate lyase [EC:2.6.1.85 4.1.3.38]
Rhodococcus opacus 1CP	pR1CP1	R1CP_RS37775	K07492	1.8e-23	putative transposase
Rhodococcus opacus 1CP	pR1CP1	R1CP_RS37780	K07483	7.3e-19	transposase
Rhodococcus opacus 1CP	pR1CP1	R1CP_RS37790	K15066	1e-175	vanillate/3-O-methylgallate O-demethylase [EC:2.1.1.341]
Rhodococcus opacus 1CP	pR1CP1	R1CP_RS37795	K01433	1.5e-140	formyltetrahydrofolate deformylase [EC:3.5.1.10]
Rhodococcus opacus 1CP	pR1CP1	R1CP_RS40665	K00796	4.1e-118	dihydropteroate synthase [EC:2.5.1.15]
Rhodococcus opacus 1CP	pR1CP1	R1CP_RS37810	K00491	9.6e-158	nitric-oxide synthase, bacterial [EC:1.14.14.47]
Rhodococcus opacus 1CP	pR1CP1	R1CP_RS37860	K01990	7.8e-90	ABC-2 type transport system ATP-binding protein
Rhodococcus opacus 1CP	pR1CP1	R1CP_RS37865	K00128	7e-184	aldehyde dehydrogenase (NAD+) [EC:1.2.1.3]
Rhodococcus opacus 1CP	pR1CP1	R1CP_RS37885	K04033	5e-51	AraC family transcriptional regulator, ethanolamine operon transcriptional activator
Rhodococcus opacus 1CP	pR1CP1	R1CP_RS37890	K14063	1.7e-79	AraC family transcriptional regulator, positive regulator of tynA and feaB
Rhodococcus opacus 1CP	pR1CP1	R1CP_RS37895	K07497	1.7e-09	putative transposase
Rhodococcus opacus 1CP	pR1CP1	R1CP_RS37945	K18955	1.3e-29	WhiB family transcriptional regulator, redox-sensing transcriptional regulator
Rhodococcus opacus 1CP	pR1CP1	R1CP_RS37975	K07497	2.6e-09	putative transposase
Rhodococcus opacus 1CP	pR1CP1	R1CP_RS37990	K04763	1.5e-65	integrase/recombinase XerD
Rhodococcus opacus 1CP	pR1CP1	R1CP_RS37995	K07483	1.2e-21	transposase
Rhodococcus opacus 1CP	pR1CP1	R1CP_RS38075	K00019	1.3e-64	3-hydroxybutyrate dehydrogenase [EC:1.1.1.30]
Rhodococcus opacus 1CP	pR1CP1	R1CP_RS38085	K00344	1.8e-86	NADPH:quinone reductase [EC:1.6.5.5]
Rhodococcus opacus 1CP	pR1CP1	R1CP_RS38095	K16137	1.1e-40	TetR/AcrR family transcriptional regulator, transcriptional repressor for nem operon
Rhodococcus opacus 1CP	pR1CP1	R1CP_RS38140	K06945	2.8e-90	uncharacterized protein
Rhodococcus opacus 1CP	pR1CP1	R1CP_RS38145	K07131	6.1e-34	uncharacterized protein
Rhodococcus opacus 1CP	pR1CP1	R1CP_RS38155	K01810	4.7e-259	glucose-6-phosphate isomerase [EC:5.3.1.9]
Rhodococcus opacus 1CP	pR1CP1	R1CP_RS38160	K00033	1.1e-100	6-phosphogluconate dehydrogenase [EC:1.1.1.44 1.1.1.343]
Rhodococcus opacus 1CP	pR1CP1	R1CP_RS38165	K08093	5.1e-73	3-hexulose-6-phosphate synthase [EC:4.1.2.43]
Rhodococcus opacus 1CP	pR1CP1	R1CP_RS38170	K08094	1.6e-71	6-phospho-3-hexuloisomerase [EC:5.3.1.27]
Rhodococcus opacus 1CP	pR1CP1	R1CP_RS38180	K00036	6.5e-174	glucose-6-phosphate 1-dehydrogenase [EC:1.1.1.49 1.1.1.363]
Rhodococcus opacus 1CP	pR1CP1	R1CP_RS40715	K01061	9.2e-47	carboxymethylenebutenolidase [EC:3.1.1.45]
Rhodococcus opacus 1CP	pR1CP1	R1CP_RS38195	K01856	1.2e-138	muconate cycloisomerase [EC:5.5.1.1]
Rhodococcus opacus 1CP	pR1CP1	R1CP_RS40720	K03464	2.8e-38	muconolactone D-isomerase [EC:5.3.3.4]
Rhodococcus opacus 1CP	pR1CP1	R1CP_RS38210	K00217	5.6e-133	maleylacetate reductase [EC:1.3.1.32]
Rhodococcus opacus 1CP	pR1CP1	R1CP_RS38215	K00483	2.4e-208	4-hydroxyphenylacetate 3-monooxygenase [EC:1.14.14.9]
Rhodococcus opacus 1CP	pR1CP1	R1CP_RS38230	K07497	4.9e-33	putative transposase
Rhodococcus opacus 1CP	pR1CP1	R1CP_RS38230	K07483	1.9e-12	transposase
Rhodococcus opacus 1CP	pR1CP1	R1CP_RS38235	K13419	0	serine/threonine-protein kinase PknK [EC:2.7.11.1]
Rhodococcus opacus 1CP	pR1CP1	R1CP_RS38235	K03556	1.6e-131	LuxR family transcriptional regulator, maltose regulon positive regulatory protein
Rhodococcus opacus 1CP	pR1CP1	R1CP_RS38235	K12132	1.4e-80	eukaryotic-like serine/threonine-protein kinase [EC:2.7.11.1]
Rhodococcus opacus 1CP	pR1CP1	R1CP_RS38240	K00435	2.5e-85	hydrogen peroxide-dependent heme synthase [EC:1.3.98.5]
Rhodococcus opacus 1CP	pR1CP1	R1CP_RS38285	K04033	5.9e-43	AraC family transcriptional regulator, ethanolamine operon transcriptional activator
Rhodococcus opacus 1CP	pR1CP1	R1CP_RS40745	K18955	2.2e-22	WhiB family transcriptional regulator, redox-sensing transcriptional regulator
Rhodococcus opacus 1CP	pR1CP1	R1CP_RS43160	K07483	6.7e-19	transposase
Rhodococcus opacus 1CP	pR1CP1	R1CP_RS41485	K07497	3.5e-11	putative transposase
Rhodococcus opacus 1CP	pR1CP1	R1CP_RS38350	K00375	1e-181	GntR family transcriptional regulator / MocR family aminotransferase
Rhodococcus opacus 1CP	pR1CP1	R1CP_RS38360	K22522	3.8e-30	cytokinin riboside 5'-monophosphate phosphoribohydrolase [EC:3.2.2.-]
Rhodococcus opacus 1CP	pR1CP1	R1CP_RS38380	K07486	2.1e-60	transposase
Rhodococcus opacus 1CP	pR1CP1	R1CP_RS38405	K03088	2e-22	RNA polymerase sigma-70 factor, ECF subfamily
Rhodococcus opacus 1CP	pR1CP1	R1CP_RS38420	K04763	5.3e-65	integrase/recombinase XerD
Rhodococcus opacus 1CP	pR1CP1	R1CP_RS38435	K04763	3.8e-58	integrase/recombinase XerD
Rhodococcus opacus 1CP	pR1CP1	R1CP_RS38445	K04763	5.1e-55	integrase/recombinase XerD
Rhodococcus opacus 1CP	pR1CP1	R1CP_RS38480	K04047	5.8e-50	starvation-inducible DNA-binding protein
Rhodococcus opacus 1CP	pR1CP1	R1CP_RS38495	K00626	2.1e-123	acetyl-CoA C-acetyltransferase [EC:2.3.1.9]
Rhodococcus opacus 1CP	pR1CP1	R1CP_RS38500	K01118	5.9e-55	FMN-dependent NADH-azoreductase [EC:1.7.1.17]
Rhodococcus opacus 1CP	pR1CP1	R1CP_RS38505	K07497	4.9e-33	putative transposase
Rhodococcus opacus 1CP	pR1CP1	R1CP_RS38505	K07483	1.9e-12	transposase
Rhodococcus opacus 1CP	pR1CP1	R1CP_RS38520	K01501	1.3e-90	nitrilase [EC:3.5.5.1]
Rhodococcus opacus 1CP	pR1CP1	R1CP_RS38535	K07486	2.1e-60	transposase
Rhodococcus opacus 1CP	pR1CP1	R1CP_RS40785	K07492	5.9e-67	putative transposase
Rhodococcus opacus 1CP	pR1CP1	R1CP_RS38570	K22553	1.6e-139	4-methoxybenzoate monooxygenase (O-demethylating) [EC:1.14.99.15]
Rhodococcus opacus 1CP	pR1CP1	R1CP_RS38575	K05337	3.4e-11	ferredoxin
Rhodococcus opacus 1CP	pR1CP1	R1CP_RS38580	K14657	2e-87	LysR family transcriptional regulator, nod-box dependent transcriptional activator
Rhodococcus opacus 1CP	pR1CP1	R1CP_RS38590	K21726	0	4-nitrophenol 2-monooxygenase / 4-nitrocatechol 4-monooxygenase, oxygenase component [EC:1.14.13.29 1.14.13.166]
Rhodococcus opacus 1CP	pR1CP1	R1CP_RS40800	K04098	1.9e-119	hydroxyquinol 1,2-dioxygenase [EC:1.13.11.37]
Rhodococcus opacus 1CP	pR1CP1	R1CP_RS38595	K00217	2.3e-119	maleylacetate reductase [EC:1.3.1.32]
Rhodococcus opacus 1CP	pR1CP2	R1CP_RS38675	K01971	8.2e-75	bifunctional non-homologous end joining protein LigD [EC:6.5.1.1]
Rhodococcus opacus 1CP	pR1CP2	R1CP_RS38695	K03496	4.6e-43	chromosome partitioning protein
Rhodococcus opacus 1CP	pR1CP2	R1CP_RS38700	K01069	4.2e-45	hydroxyacylglutathione hydrolase [EC:3.1.2.6]
Rhodococcus opacus 1CP	pR1CP2	R1CP_RS38800	K03205	3.7e-40	type IV secretion system protein VirD4 [EC:7.4.2.8]
Rhodococcus opacus 1CP	pR1CP2	R1CP_RS38865	K14060	2.7e-51	putative DNA-invertase from lambdoid prophage Rac
Rhodococcus opacus 1CP	pR1CP2	R1CP_RS38870	K04095	2.3e-66	cell filamentation protein
Rhodococcus opacus 1CP	pR1CP2	R1CP_RS38895	K03704	3.2e-25	cold shock protein
Rhodococcus opacus 1CP	pR1CP2	R1CP_RS38925	K06191	3.3e-38	glutaredoxin-like protein NrdH
Rhodococcus opacus 1CP	pR1CP2	R1CP_RS38930	K03497	3.3e-25	ParB family transcriptional regulator, chromosome partitioning protein
Rhodococcus opacus PD630	pRoPD630_1	K2Z90_RS38100	K02039	4.9e-56	phosphate transport system protein
Rhodococcus opacus PD630	pRoPD630_1	K2Z90_RS38175	K03466	1.5e-23	DNA segregation ATPase FtsK/SpoIIIE, S-DNA-T family
Rhodococcus opacus PD630	pRoPD630_1	K2Z90_RS38220	K00059	2.1e-90	3-oxoacyl-[acyl-carrier protein] reductase [EC:1.1.1.100]
Rhodococcus opacus PD630	pRoPD630_1	K2Z90_RS38280	K03496	1.4e-56	chromosome partitioning protein
Rhodococcus opacus PD630	pRoPD630_1	K2Z90_RS38380	K02342	4.6e-49	DNA polymerase III subunit epsilon [EC:2.7.7.7]
Rhodococcus opacus PD630	pRoPD630_1	K2Z90_RS38430	K01971	4.8e-71	bifunctional non-homologous end joining protein LigD [EC:6.5.1.1]
Rhodococcus opacus PD630	pRoPD630_1	K2Z90_RS38470	K13419	0	serine/threonine-protein kinase PknK [EC:2.7.11.1]
Rhodococcus opacus PD630	pRoPD630_1	K2Z90_RS38470	K03556	7.8e-122	LuxR family transcriptional regulator, maltose regulon positive regulatory protein
Rhodococcus opacus PD630	pRoPD630_1	K2Z90_RS38470	K12132	3e-78	eukaryotic-like serine/threonine-protein kinase [EC:2.7.11.1]
Rhodococcus opacus PD630	pRoPD630_1	K2Z90_RS38510	K00038	5.7e-94	3alpha(or 20beta)-hydroxysteroid dehydrogenase [EC:1.1.1.53]
Rhodococcus opacus PD630	pRoPD630_1	K2Z90_RS38525	K06995	9.5e-24	uncharacterized protein
Rhodococcus opacus PD630	pRoPD630_1	K2Z90_RS38535	K12466	4.9e-119	(+)-trans-carveol dehydrogenase [EC:1.1.1.275]
Rhodococcus opacus PD630	pRoPD630_1	K2Z90_RS38545	K00135	2.5e-229	succinate-semialdehyde dehydrogenase / glutarate-semialdehyde dehydrogenase [EC:1.2.1.16 1.2.1.79 1.2.1.20]
Rhodococcus opacus PD630	pRoPD630_1	K2Z90_RS38595	K14534	4.5e-147	4-hydroxybutyryl-CoA dehydratase / vinylacetyl-CoA-Delta-isomerase [EC:4.2.1.120 5.3.3.3]
Rhodococcus opacus PD630	pRoPD630_1	K2Z90_RS38600	K01796	1.1e-177	alpha-methylacyl-CoA racemase [EC:5.1.99.4]
Rhodococcus opacus PD630	pRoPD630_1	K2Z90_RS38605	K02182	7.3e-180	carnitine-CoA ligase [EC:6.2.1.48]
Rhodococcus opacus PD630	pRoPD630_1	K2Z90_RS38620	K08172	3.7e-158	MFS transporter, MHS family, shikimate and dehydroshikimate transport protein
Rhodococcus opacus PD630	pRoPD630_1	K2Z90_RS38635	K02182	2.6e-189	carnitine-CoA ligase [EC:6.2.1.48]
Rhodococcus opacus PD630	pRoPD630_1	K2Z90_RS38655	K02624	5.9e-94	IclR family transcriptional regulator, pca regulon regulatory protein
Rhodococcus opacus PD630	pRoPD630_1	K2Z90_RS38660	K08172	2.3e-157	MFS transporter, MHS family, shikimate and dehydroshikimate transport protein
Rhodococcus opacus PD630	pRoPD630_1	K2Z90_RS38670	K00014	2.5e-72	shikimate dehydrogenase [EC:1.1.1.25]
Rhodococcus opacus PD630	pRoPD630_1	K2Z90_RS38690	K01692	5e-89	enoyl-CoA hydratase [EC:4.2.1.17]
Rhodococcus opacus PD630	pRoPD630_1	K2Z90_RS38700	K02065	1.1e-137	phospholipid/cholesterol/gamma-HCH transport system ATP-binding protein
Rhodococcus opacus PD630	pRoPD630_1	K2Z90_RS38705	K02066	1.8e-80	phospholipid/cholesterol/gamma-HCH transport system permease protein
Rhodococcus opacus PD630	pRoPD630_1	K2Z90_RS38710	K02066	2.7e-57	phospholipid/cholesterol/gamma-HCH transport system permease protein
Rhodococcus opacus PD630	pRoPD630_1	K2Z90_RS38715	K02067	5.9e-44	phospholipid/cholesterol/gamma-HCH transport system substrate-binding protein
Rhodococcus opacus PD630	pRoPD630_1	K2Z90_RS38720	K02067	7.7e-62	phospholipid/cholesterol/gamma-HCH transport system substrate-binding protein
Rhodococcus opacus PD630	pRoPD630_1	K2Z90_RS38725	K02067	4.1e-53	phospholipid/cholesterol/gamma-HCH transport system substrate-binding protein
Rhodococcus opacus PD630	pRoPD630_1	K2Z90_RS38730	K02067	5.9e-64	phospholipid/cholesterol/gamma-HCH transport system substrate-binding protein
Rhodococcus opacus PD630	pRoPD630_1	K2Z90_RS38735	K02067	1.5e-55	phospholipid/cholesterol/gamma-HCH transport system substrate-binding protein
Rhodococcus opacus PD630	pRoPD630_1	K2Z90_RS38740	K02067	2.7e-57	phospholipid/cholesterol/gamma-HCH transport system substrate-binding protein
Rhodococcus opacus PD630	pRoPD630_1	K2Z90_RS38745	K18481	2.3e-37	Mce-associated membrane protein
Rhodococcus opacus PD630	pRoPD630_1	K2Z90_RS38750	K18481	1.8e-44	Mce-associated membrane protein
Rhodococcus opacus PD630	pRoPD630_1	K2Z90_RS38760	K09699	1.1e-156	2-oxoisovalerate dehydrogenase E2 component (dihydrolipoyl transacylase) [EC:2.3.1.168]
Rhodococcus opacus PD630	pRoPD630_1	K2Z90_RS38765	K00167	1.5e-149	2-oxoisovalerate dehydrogenase E1 component beta subunit [EC:1.2.4.4]
Rhodococcus opacus PD630	pRoPD630_1	K2Z90_RS38770	K00166	9.5e-136	2-oxoisovalerate dehydrogenase E1 component alpha subunit [EC:1.2.4.4]
Rhodococcus opacus PD630	pRoPD630_1	K2Z90_RS38775	K00382	3.8e-146	dihydrolipoamide dehydrogenase [EC:1.8.1.4]
Rhodococcus opacus PD630	pRoPD630_1	K2Z90_RS38780	K11530	1.2e-18	(4S)-4-hydroxy-5-phosphonooxypentane-2,3-dione isomerase [EC:5.3.1.32]
Rhodococcus opacus PD630	pRoPD630_1	K2Z90_RS38790	K21700	1.7e-20	beta-alanine degradation protein BauB
Rhodococcus opacus PD630	pRoPD630_1	K2Z90_RS38810	K00077	1.3e-67	2-dehydropantoate 2-reductase [EC:1.1.1.169]
Rhodococcus opacus PD630	pRoPD630_1	K2Z90_RS38815	K15977	9.5e-26	putative oxidoreductase
Rhodococcus opacus PD630	pRoPD630_1	K2Z90_RS38840	K08282	7.8e-88	non-specific serine/threonine protein kinase [EC:2.7.11.1]
Rhodococcus opacus PD630	pRoPD630_1	K2Z90_RS38840	K12132	5.7e-78	eukaryotic-like serine/threonine-protein kinase [EC:2.7.11.1]
Rhodococcus opacus PD630	pRoPD630_1	K2Z90_RS38855	K01796	4.6e-171	alpha-methylacyl-CoA racemase [EC:5.1.99.4]
Rhodococcus opacus PD630	pRoPD630_1	K2Z90_RS38870	K22108	4.4e-43	TetR/AcrR family transcriptional regulator, cholesterol catabolism regulator
Rhodococcus opacus PD630	pRoPD630_1	K2Z90_RS38880	K00059	7.8e-92	3-oxoacyl-[acyl-carrier protein] reductase [EC:1.1.1.100]
Rhodococcus opacus PD630	pRoPD630_1	K2Z90_RS38920	K07068	8.7e-15	uncharacterized protein
Rhodococcus opacus PD630	pRoPD630_1	K2Z90_RS38925	K00626	9.2e-42	acetyl-CoA C-acetyltransferase [EC:2.3.1.9]
Rhodococcus opacus PD630	pRoPD630_1	K2Z90_RS38930	K15866	6.5e-94	2-(1,2-epoxy-1,2-dihydrophenyl)acetyl-CoA isomerase [EC:5.3.3.18]
Rhodococcus opacus PD630	pRoPD630_1	K2Z90_RS38930	K06893	1e-18	uncharacterized protein
Rhodococcus opacus PD630	pRoPD630_1	K2Z90_RS38945	K22108	3e-48	TetR/AcrR family transcriptional regulator, cholesterol catabolism regulator
Rhodococcus opacus PD630	pRoPD630_1	K2Z90_RS38950	K05337	1e-17	ferredoxin
Rhodococcus opacus PD630	pRoPD630_1	K2Z90_RS38955	K00529	1.5e-138	3-phenylpropionate/trans-cinnamate dioxygenase ferredoxin reductase component [EC:1.18.1.3]
Rhodococcus opacus PD630	pRoPD630_1	K2Z90_RS39020	K14063	9.2e-51	AraC family transcriptional regulator, positive regulator of tynA and feaB
Rhodococcus opacus PD630	pRoPD630_1	K2Z90_RS39030	K02182	4.7e-217	carnitine-CoA ligase [EC:6.2.1.48]
Rhodococcus opacus PD630	pRoPD630_1	K2Z90_RS39035	K03762	6.8e-154	MFS transporter, MHS family, proline/betaine transporter
Rhodococcus opacus PD630	pRoPD630_1	K2Z90_RS39040	K22108	3.2e-40	TetR/AcrR family transcriptional regulator, cholesterol catabolism regulator
Rhodococcus opacus PD630	pRoPD630_1	K2Z90_RS39095	K07486	3.8e-45	transposase
Rhodococcus opacus PD630	pRoPD630_1	K2Z90_RS39105	K01424	5.5e-66	L-asparaginase [EC:3.5.1.1]
Rhodococcus opacus PD630	pRoPD630_1	K2Z90_RS39120	K07485	4.3e-48	transposase
Rhodococcus opacus PD630	pRoPD630_1	K2Z90_RS39140	K22278	3.9e-48	peptidoglycan-N-acetylglucosamine deacetylase [EC:3.5.1.104]
Rhodococcus opacus PD630	pRoPD630_1	K2Z90_RS39180	K07448	3.1e-09	restriction system protein
Rhodococcus opacus PD630	pRoPD630_1	K2Z90_RS39250	K09946	5.2e-16	uncharacterized protein
Rhodococcus opacus PD630	pRoPD630_1	K2Z90_RS39255	K07486	4.4e-69	transposase
Rhodococcus opacus PD630	pRoPD630_1	K2Z90_RS39275	K07240	2.1e-69	chromate transporter
Rhodococcus opacus PD630	pRoPD630_1	K2Z90_RS39285	K02039	4.6e-58	phosphate transport system protein
Rhodococcus opacus PD630	pRoPD630_1	K2Z90_RS39305	K02035	2.1e-86	peptide/nickel transport system substrate-binding protein
Rhodococcus opacus PD630	pRoPD630_1	K2Z90_RS39310	K02033	7.2e-85	peptide/nickel transport system permease protein
Rhodococcus opacus PD630	pRoPD630_1	K2Z90_RS39320	K02032	2.8e-139	peptide/nickel transport system ATP-binding protein
Rhodococcus opacus PD630	pRoPD630_1	K2Z90_RS39320	K02031	4.4e-123	peptide/nickel transport system ATP-binding protein
Rhodococcus opacus PD630	pRoPD630_1	K2Z90_RS39325	K18058	2.6e-95	L-asparagine oxygenase [EC:1.14.11.39]
Rhodococcus opacus PD630	pRoPD630_1	K2Z90_RS39345	K03327	9.3e-69	multidrug resistance protein, MATE family
Rhodococcus opacus PD630	pRoPD630_1	K2Z90_RS39360	K18334	2.2e-204	L-fuconate dehydratase [EC:4.2.1.68]
Rhodococcus opacus PD630	pRoPD630_1	K2Z90_RS39365	K14519	2.7e-210	NADP-dependent aldehyde dehydrogenase [EC:1.2.1.4]
Rhodococcus opacus PD630	pRoPD630_1	K2Z90_RS39375	K07225	2.1e-24	putative hemin transport protein
Rhodococcus opacus PD630	pRoPD630_1	K2Z90_RS39380	K02011	1.2e-109	iron(III) transport system permease protein
Rhodococcus opacus PD630	pRoPD630_1	K2Z90_RS39385	K02012	1.5e-75	iron(III) transport system substrate-binding protein
Rhodococcus opacus PD630	pRoPD630_1	K2Z90_RS39390	K01897	6.1e-139	long-chain acyl-CoA synthetase [EC:6.2.1.3]
Rhodococcus opacus PD630	pRoPD630_1	K2Z90_RS39395	K09781	8.4e-37	uncharacterized protein
Rhodococcus opacus PD630	pRoPD630_1	K2Z90_RS39450	K01113	5.6e-130	alkaline phosphatase D [EC:3.1.3.1]
Rhodococcus opacus PD630	pRoPD630_1	K2Z90_RS39490	K07492	4.1e-68	putative transposase
Rhodococcus opacus PD630	pRoPD630_1	K2Z90_RS39505	K07552	3.6e-136	MFS transporter, DHA1 family, multidrug resistance protein
Rhodococcus opacus PD630	pRoPD630_1	K2Z90_RS39530	K15735	1.1e-83	GntR family transcriptional regulator, carbon starvation induced regulator
Rhodococcus opacus PD630	pRoPD630_1	K2Z90_RS39550	K22187	1.1e-201	alpha-ketoglutaric semialdehyde dehydrogenase [EC:1.2.1.-]
Rhodococcus opacus PD630	pRoPD630_1	K2Z90_RS39560	K00074	5.6e-125	3-hydroxybutyryl-CoA dehydrogenase [EC:1.1.1.157]
Rhodococcus opacus PD630	pRoPD630_1	K2Z90_RS39570	K09956	9.1e-24	uncharacterized protein
Rhodococcus opacus PD630	pRoPD630_1	K2Z90_RS39580	K08282	2e-88	non-specific serine/threonine protein kinase [EC:2.7.11.1]
Rhodococcus opacus PD630	pRoPD630_1	K2Z90_RS39580	K12132	1.1e-84	eukaryotic-like serine/threonine-protein kinase [EC:2.7.11.1]
Rhodococcus opacus PD630	pRoPD630_1	K2Z90_RS39605	K00020	1.2e-80	3-hydroxyisobutyrate dehydrogenase [EC:1.1.1.31]
Rhodococcus opacus PD630	pRoPD630_1	K2Z90_RS39615	K20539	1.2e-95	IclR family transcriptional regulator, blcABC operon repressor
Rhodococcus opacus PD630	pRoPD630_1	K2Z90_RS39620	K08173	5.8e-181	MFS transporter, MHS family, metabolite:H+ symporter
Rhodococcus opacus PD630	pRoPD630_1	K2Z90_RS39625	K00046	1.9e-113	gluconate 5-dehydrogenase [EC:1.1.1.69]
Rhodococcus opacus PD630	pRoPD630_1	K2Z90_RS39630	K00098	1.9e-133	L-idonate 5-dehydrogenase [EC:1.1.1.264]
Rhodococcus opacus PD630	pRoPD630_1	K2Z90_RS39635	K00615	2.6e-229	transketolase [EC:2.2.1.1]
Rhodococcus opacus PD630	pRoPD630_1	K2Z90_RS39640	K00616	6.1e-70	transaldolase [EC:2.2.1.2]
Rhodococcus opacus PD630	pRoPD630_1	K2Z90_RS39650	K00020	2.9e-78	3-hydroxyisobutyrate dehydrogenase [EC:1.1.1.31]
Rhodococcus opacus PD630	pRoPD630_1	K2Z90_RS39655	K00851	5.3e-72	gluconokinase [EC:2.7.1.12]
Rhodococcus opacus PD630	pRoPD630_1	K2Z90_RS39660	K00033	8.9e-232	6-phosphogluconate dehydrogenase [EC:1.1.1.44 1.1.1.343]
Rhodococcus opacus PD630	pRoPD630_1	K2Z90_RS39675	K13419	0	serine/threonine-protein kinase PknK [EC:2.7.11.1]
Rhodococcus opacus PD630	pRoPD630_1	K2Z90_RS39675	K03556	1.9e-130	LuxR family transcriptional regulator, maltose regulon positive regulatory protein
Rhodococcus opacus PD630	pRoPD630_1	K2Z90_RS39675	K12132	1.7e-89	eukaryotic-like serine/threonine-protein kinase [EC:2.7.11.1]
Rhodococcus opacus PD630	pRoPD630_1	K2Z90_RS39675	K08282	4.1e-83	non-specific serine/threonine protein kinase [EC:2.7.11.1]
Rhodococcus opacus PD630	pRoPD630_1	K2Z90_RS39680	K01644	6.3e-61	citrate lyase subunit beta / citryl-CoA lyase [EC:4.1.3.34]
Rhodococcus opacus PD630	pRoPD630_1	K2Z90_RS39685	K01595	0	phosphoenolpyruvate carboxylase [EC:4.1.1.31]
Rhodococcus opacus PD630	pRoPD630_1	K2Z90_RS39700	K02529	1.7e-85	LacI family transcriptional regulator
Rhodococcus opacus PD630	pRoPD630_1	K2Z90_RS39720	K00446	2.8e-96	catechol 2,3-dioxygenase [EC:1.13.11.2]
Rhodococcus opacus PD630	pRoPD630_1	K2Z90_RS39725	K01607	7.7e-10	4-carboxymuconolactone decarboxylase [EC:4.1.1.44]
Rhodococcus opacus PD630	pRoPD630_1	K2Z90_RS39740	K08282	6.1e-87	non-specific serine/threonine protein kinase [EC:2.7.11.1]
Rhodococcus opacus PD630	pRoPD630_1	K2Z90_RS39740	K12132	3.4e-84	eukaryotic-like serine/threonine-protein kinase [EC:2.7.11.1]
Rhodococcus opacus PD630	pRoPD630_1	K2Z90_RS39745	K00074	4.4e-125	3-hydroxybutyryl-CoA dehydrogenase [EC:1.1.1.157]
Rhodococcus opacus PD630	pRoPD630_1	K2Z90_RS39760	K01689	8.5e-147	enolase [EC:4.2.1.11]
Rhodococcus opacus PD630	pRoPD630_1	K2Z90_RS39780	K15977	6.5e-24	putative oxidoreductase
Rhodococcus opacus PD630	pRoPD630_1	K2Z90_RS39820	K03284	1.5e-110	magnesium transporter
Rhodococcus opacus PD630	pRoPD630_1	K2Z90_RS39830	K18446	2.6e-36	triphosphatase [EC:3.6.1.25]
Rhodococcus opacus PD630	pRoPD630_1	K2Z90_RS39855	K06996	3.1e-32	uncharacterized protein
Rhodococcus opacus PD630	pRoPD630_1	K2Z90_RS39870	K00635	5.6e-38	diacylglycerol O-acyltransferase / wax synthase [EC:2.3.1.20 2.3.1.75]
Rhodococcus opacus PD630	pRoPD630_1	K2Z90_RS39935	K00666	1.2e-187	fatty-acyl-CoA synthase [EC:6.2.1.-]
Rhodococcus opacus PD630	pRoPD630_1	K2Z90_RS39965	K01066	3.1e-79	acetyl esterase [EC:3.1.1.-]
Rhodococcus opacus PD630	pRoPD630_1	K2Z90_RS39975	K01055	1.2e-60	3-oxoadipate enol-lactonase [EC:3.1.1.24]
Rhodococcus opacus PD630	pRoPD630_1	K2Z90_RS40010	K00249	9.3e-116	acyl-CoA dehydrogenase [EC:1.3.8.7]
Rhodococcus opacus PD630	pRoPD630_1	K2Z90_RS40015	K00249	5.3e-129	acyl-CoA dehydrogenase [EC:1.3.8.7]
Rhodococcus opacus PD630	pRoPD630_1	K2Z90_RS40025	K08282	7.6e-87	non-specific serine/threonine protein kinase [EC:2.7.11.1]
Rhodococcus opacus PD630	pRoPD630_1	K2Z90_RS40025	K12132	3.2e-82	eukaryotic-like serine/threonine-protein kinase [EC:2.7.11.1]
Rhodococcus opacus PD630	pRoPD630_1	K2Z90_RS40030	K14652	4.2e-200	3,4-dihydroxy 2-butanone 4-phosphate synthase / GTP cyclohydrolase II [EC:4.1.99.12 3.5.4.25]
Rhodococcus opacus PD630	pRoPD630_1	K2Z90_RS40035	K16048	2.9e-78	3-hydroxy-9,10-secoandrosta-1,3,5(10)-triene-9,17-dione monooxygenase reductase component [EC:1.5.1.-]
Rhodococcus opacus PD630	pRoPD630_1	K2Z90_RS40040	K00626	1.3e-132	acetyl-CoA C-acetyltransferase [EC:2.3.1.9]
Rhodococcus opacus PD630	pRoPD630_1	K2Z90_RS40045	K00059	7.7e-94	3-oxoacyl-[acyl-carrier protein] reductase [EC:1.1.1.100]
Rhodococcus opacus PD630	pRoPD630_1	K2Z90_RS40055	K03762	1.5e-154	MFS transporter, MHS family, proline/betaine transporter
Rhodococcus opacus PD630	pRoPD630_1	K2Z90_RS40070	K00324	2.3e-149	H+-translocating NAD(P) transhydrogenase subunit alpha [EC:1.6.1.2 7.1.1.1]
Rhodococcus opacus PD630	pRoPD630_1	K2Z90_RS40080	K00325	2.5e-193	H+-translocating NAD(P) transhydrogenase subunit beta [EC:1.6.1.2 7.1.1.1]
Rhodococcus opacus PD630	pRoPD630_1	K2Z90_RS40190	K04098	1.8e-124	hydroxyquinol 1,2-dioxygenase [EC:1.13.11.37]
Rhodococcus opacus PD630	pRoPD630_1	K2Z90_RS40195	K00217	7.5e-136	maleylacetate reductase [EC:1.3.1.32]
Rhodococcus opacus PD630	pRoPD630_1	K2Z90_RS40200	K00480	2.3e-134	salicylate hydroxylase [EC:1.14.13.1]
Rhodococcus opacus PD630	pRoPD630_1	K2Z90_RS40215	K18383	3.6e-121	feruloyl-CoA hydratase/lyase [EC:4.1.2.61]
Rhodococcus opacus PD630	pRoPD630_1	K2Z90_RS40250	K00451	2.4e-76	homogentisate 1,2-dioxygenase [EC:1.13.11.5]
Rhodococcus opacus PD630	pRoPD630_1	K2Z90_RS40270	K01027	7.5e-225	3-oxoacid CoA-transferase [EC:2.8.3.5]
Rhodococcus opacus PD630	pRoPD630_1	K2Z90_RS40270	K01028	1.2e-115	3-oxoacid CoA-transferase subunit A [EC:2.8.3.5]
Rhodococcus opacus PD630	pRoPD630_1	K2Z90_RS40270	K01029	6.3e-115	3-oxoacid CoA-transferase subunit B [EC:2.8.3.5]
Rhodococcus opacus PD630	pRoPD630_1	K2Z90_RS40280	K18955	4.1e-26	WhiB family transcriptional regulator, redox-sensing transcriptional regulator
Rhodococcus opacus PD630	pRoPD630_1	K2Z90_RS40285	K01704	8.7e-75	3-isopropylmalate/(R)-2-methylmalate dehydratase small subunit [EC:4.2.1.33 4.2.1.35]
Rhodococcus opacus PD630	pRoPD630_1	K2Z90_RS40310	K01666	4.5e-146	4-hydroxy 2-oxovalerate aldolase [EC:4.1.3.39]
Rhodococcus opacus PD630	pRoPD630_1	K2Z90_RS40315	K04073	1.4e-147	acetaldehyde dehydrogenase [EC:1.2.1.10]
Rhodococcus opacus PD630	pRoPD630_1	K2Z90_RS40320	K02554	9.1e-101	2-keto-4-pentenoate hydratase [EC:4.2.1.80]
Rhodococcus opacus PD630	pRoPD630_1	K2Z90_RS40335	K10676	6.1e-233	2,4-dichlorophenol 6-monooxygenase [EC:1.14.13.20]
Rhodococcus opacus PD630	pRoPD630_1	K2Z90_RS40340	K05714	2.1e-91	2-hydroxy-6-oxonona-2,4-dienedioate hydrolase [EC:3.7.1.14]
Rhodococcus opacus PD630	pRoPD630_1	K2Z90_RS40345	K05713	2.6e-128	2,3-dihydroxyphenylpropionate 1,2-dioxygenase [EC:1.13.11.16]
Rhodococcus opacus PD630	pRoPD630_1	K2Z90_RS40360	K05714	5.3e-90	2-hydroxy-6-oxonona-2,4-dienedioate hydrolase [EC:3.7.1.14]
Rhodococcus opacus PD630	pRoPD630_1	K2Z90_RS40365	K08172	3.7e-163	MFS transporter, MHS family, shikimate and dehydroshikimate transport protein
Rhodococcus opacus PD630	pRoPD630_1	K2Z90_RS40405	K18955	2.4e-27	WhiB family transcriptional regulator, redox-sensing transcriptional regulator
Rhodococcus opacus PD630	pRoPD630_1	K2Z90_RS40430	K10216	4.2e-84	2-hydroxymuconate-semialdehyde hydrolase [EC:3.7.1.9]
Rhodococcus opacus PD630	pRoPD630_1	K2Z90_RS40440	K05713	7.5e-79	2,3-dihydroxyphenylpropionate 1,2-dioxygenase [EC:1.13.11.16]
Rhodococcus opacus PD630	pRoPD630_1	K2Z90_RS40445	K14519	2.6e-195	NADP-dependent aldehyde dehydrogenase [EC:1.2.1.4]
Rhodococcus opacus PD630	pRoPD630_1	K2Z90_RS40450	K08172	1.2e-166	MFS transporter, MHS family, shikimate and dehydroshikimate transport protein
Rhodococcus opacus PD630	pRoPD630_1	K2Z90_RS40455	K10914	6.3e-68	CRP/FNR family transcriptional regulator, cyclic AMP receptor protein
Rhodococcus opacus PD630	pRoPD630_1	K2Z90_RS40485	K09946	5.2e-16	uncharacterized protein
Rhodococcus opacus PD630	pRoPD630_2	K2Z90_RS40555	K14060	1e-49	putative DNA-invertase from lambdoid prophage Rac
Rhodococcus opacus PD630	pRoPD630_2	K2Z90_RS40570	K07052	1.2e-08	CAAX protease family protein
Rhodococcus opacus PD630	pRoPD630_2	K2Z90_RS40590	K06191	2.9e-38	glutaredoxin-like protein NrdH
Rhodococcus opacus PD630	pRoPD630_2	K2Z90_RS40595	K03497	1e-25	ParB family transcriptional regulator, chromosome partitioning protein
Rhodococcus opacus PD630	pRoPD630_2	K2Z90_RS40635	K06048	8.5e-134	glutamate---cysteine ligase / carboxylate-amine ligase [EC:6.3.2.2 6.3.-.-]
Rhodococcus opacus PD630	pRoPD630_2	K2Z90_RS40705	K01971	3.3e-77	bifunctional non-homologous end joining protein LigD [EC:6.5.1.1]
Rhodococcus opacus PD630	pRoPD630_2	K2Z90_RS40765	K20265	2.2e-158	glutamate:GABA antiporter
Rhodococcus opacus PD630	pRoPD630_2	K2Z90_RS40775	K23980	5.1e-194	cysteinylglycine-S-conjugate dipeptidase [EC:3.4.13.23]
Rhodococcus opacus PD630	pRoPD630_2	K2Z90_RS40800	K18446	1.4e-36	triphosphatase [EC:3.6.1.25]
Rhodococcus opacus PD630	pRoPD630_2	K2Z90_RS40825	K02039	1e-59	phosphate transport system protein
Rhodococcus opacus PD630	pRoPD630_2	K2Z90_RS40850	K08234	2.3e-25	glyoxylase I family protein
Rhodococcus opacus PD630	pRoPD630_2	K2Z90_RS40855	K01495	1.7e-74	GTP cyclohydrolase IA [EC:3.5.4.16]
Rhodococcus opacus PD630	pRoPD630_2	K2Z90_RS40860	K15977	2.2e-23	putative oxidoreductase
Rhodococcus opacus PD630	pRoPD630_2	K2Z90_RS40875	K07566	1.6e-68	L-threonylcarbamoyladenylate synthase [EC:2.7.7.87]
Rhodococcus opacus PD630	pRoPD630_2	K2Z90_RS40890	K00626	2.6e-32	acetyl-CoA C-acetyltransferase [EC:2.3.1.9]
Rhodococcus opacus PD630	pRoPD630_2	K2Z90_RS40895	K02510	2.7e-53	4-hydroxy-2-oxoheptanedioate aldolase [EC:4.1.2.52]
Rhodococcus opacus PD630	pRoPD630_2	K2Z90_RS40920	K08282	2.6e-91	non-specific serine/threonine protein kinase [EC:2.7.11.1]
Rhodococcus opacus PD630	pRoPD630_2	K2Z90_RS40920	K12132	1.7e-78	eukaryotic-like serine/threonine-protein kinase [EC:2.7.11.1]
Rhodococcus opacus PD630	pRoPD630_2	K2Z90_RS40935	K00135	7.4e-214	succinate-semialdehyde dehydrogenase / glutarate-semialdehyde dehydrogenase [EC:1.2.1.16 1.2.1.79 1.2.1.20]
Rhodococcus opacus PD630	pRoPD630_2	K2Z90_RS40955	K00135	1.6e-228	succinate-semialdehyde dehydrogenase / glutarate-semialdehyde dehydrogenase [EC:1.2.1.16 1.2.1.79 1.2.1.20]
Rhodococcus opacus PD630	pRoPD630_2	K2Z90_RS40965	K12466	1.4e-118	(+)-trans-carveol dehydrogenase [EC:1.1.1.275]
Rhodococcus opacus PD630	pRoPD630_2	K2Z90_RS40975	K06995	2.3e-23	uncharacterized protein
Rhodococcus opacus PD630	pRoPD630_2	K2Z90_RS40990	K00038	7.7e-94	3alpha(or 20beta)-hydroxysteroid dehydrogenase [EC:1.1.1.53]
Rhodococcus opacus PD630	pRoPD630_2	K2Z90_RS41025	K13419	0	serine/threonine-protein kinase PknK [EC:2.7.11.1]
Rhodococcus opacus PD630	pRoPD630_2	K2Z90_RS41025	K03556	2.9e-122	LuxR family transcriptional regulator, maltose regulon positive regulatory protein
Rhodococcus opacus PD630	pRoPD630_2	K2Z90_RS41025	K12132	3.1e-77	eukaryotic-like serine/threonine-protein kinase [EC:2.7.11.1]
Rhodococcus opacus PD630	pRoPD630_2	K2Z90_RS41065	K03497	6.2e-34	ParB family transcriptional regulator, chromosome partitioning protein
Rhodococcus opacus PD630	pRoPD630_2	K2Z90_RS41135	K01239	1.6e-58	purine nucleosidase [EC:3.2.2.1]
Rhodococcus opacus PD630	pRoPD630_2	K2Z90_RS41225	K03205	1.2e-60	type IV secretion system protein VirD4 [EC:7.4.2.8]
Rhodococcus opacus PD630	pRoPD630_2	K2Z90_RS41250	K06915	6.4e-43	uncharacterized protein
Rhodococcus opacus PD630	pRoPD630_3	K2Z90_RS41325	K03497	1.1e-21	ParB family transcriptional regulator, chromosome partitioning protein
Rhodococcus opacus PD630	pRoPD630_3	K2Z90_RS41330	K06191	4.6e-38	glutaredoxin-like protein NrdH
Rhodococcus opacus PD630	pRoPD630_3	K2Z90_RS41420	K03205	1.9e-63	type IV secretion system protein VirD4 [EC:7.4.2.8]
Rhodococcus opacus PD630	pRoPD630_3	K2Z90_RS41520	K00059	2.9e-87	3-oxoacyl-[acyl-carrier protein] reductase [EC:1.1.1.100]
Rhodococcus opacus PD630	pRoPD630_3	K2Z90_RS41550	K03496	2.5e-62	chromosome partitioning protein
Rhodococcus opacus PD630	pRoPD630_3	K2Z90_RS41590	K07052	2.9e-09	CAAX protease family protein
Rhodococcus opacus PD630	pRoPD630_3	K2Z90_RS41610	K03580	7.9e-95	ATP-dependent helicase HepA [EC:3.6.4.-]
Rhodococcus opacus PD630	pRoPD630_3	K2Z90_RS41620	K06922	4.7e-254	uncharacterized protein
Rhodococcus opacus PD630	pRoPD630_3	K2Z90_RS41635	K14060	1.5e-49	putative DNA-invertase from lambdoid prophage Rac
Rhodococcus jostii RHA1	pRHL1	RHA1_RS35620	K07171	5.9e-23	mRNA interferase MazF [EC:3.1.-.-]
Rhodococcus jostii RHA1	pRHL1	RHA1_RS35655	K02483	7.9e-79	two-component system, OmpR family, response regulator
Rhodococcus jostii RHA1	pRHL1	RHA1_RS35715	K00986	8.1e-84	RNA-directed DNA polymerase [EC:2.7.7.49]
Rhodococcus jostii RHA1	pRHL1	RHA1_RS35785	K14063	9.9e-62	AraC family transcriptional regulator, positive regulator of tynA and feaB
Rhodococcus jostii RHA1	pRHL1	RHA1_RS35800	K18092	5.6e-127	2-hydroxy-6-oxo-octa-2,4-dienoate hydrolase [EC:3.7.1.-]
Rhodococcus jostii RHA1	pRHL1	RHA1_RS35800	K10216	5.4e-121	2-hydroxymuconate-semialdehyde hydrolase [EC:3.7.1.9]
Rhodococcus jostii RHA1	pRHL1	RHA1_RS35810	K00344	1.1e-87	NADPH:quinone reductase [EC:1.6.5.5]
Rhodococcus jostii RHA1	pRHL1	RHA1_RS35850	K02486	2.3e-160	two-component system, sensor kinase [EC:2.7.13.3]
Rhodococcus jostii RHA1	pRHL1	RHA1_RS35860	K05711	3.4e-116	2,3-dihydroxy-2,3-dihydrophenylpropionate dehydrogenase [EC:1.3.1.87]
Rhodococcus jostii RHA1	pRHL1	RHA1_RS35865	K00462	8.4e-133	biphenyl-2,3-diol 1,2-dioxygenase [EC:1.13.11.39]
Rhodococcus jostii RHA1	pRHL1	RHA1_RS35870	K18088	5.7e-230	biphenyl 2,3-dioxygenase ferredoxin reductase component [EC:1.18.1.3]
Rhodococcus jostii RHA1	pRHL1	RHA1_RS35870	K00529	4.2e-122	3-phenylpropionate/trans-cinnamate dioxygenase ferredoxin reductase component [EC:1.18.1.3]
Rhodococcus jostii RHA1	pRHL1	RHA1_RS35875	K18087	2.1e-54	biphenyl 2,3-dioxygenase ferredoxin component
Rhodococcus jostii RHA1	pRHL1	RHA1_RS35875	K05710	1.6e-36	3-phenylpropionate/trans-cinnamate dioxygenase ferredoxin component
Rhodococcus jostii RHA1	pRHL1	RHA1_RS35880	K15750	6.3e-94	biphenyl 2,3-dioxygenase subunit beta [EC:1.14.12.18]
Rhodococcus jostii RHA1	pRHL1	RHA1_RS35880	K14749	2.2e-57	ethylbenzene dioxygenase subunit beta [EC:1.14.12.-]
Rhodococcus jostii RHA1	pRHL1	RHA1_RS35885	K08689	5.6e-277	biphenyl 2,3-dioxygenase subunit alpha [EC:1.14.12.18]
Rhodococcus jostii RHA1	pRHL1	RHA1_RS35900	K04033	3.2e-42	AraC family transcriptional regulator, ethanolamine operon transcriptional activator
Rhodococcus jostii RHA1	pRHL1	RHA1_RS35945	K00435	3.5e-85	hydrogen peroxide-dependent heme synthase [EC:1.3.98.5]
Rhodococcus jostii RHA1	pRHL1	RHA1_RS35950	K13419	0	serine/threonine-protein kinase PknK [EC:2.7.11.1]
Rhodococcus jostii RHA1	pRHL1	RHA1_RS35950	K03556	7.7e-129	LuxR family transcriptional regulator, maltose regulon positive regulatory protein
Rhodococcus jostii RHA1	pRHL1	RHA1_RS35950	K12132	1.7e-82	eukaryotic-like serine/threonine-protein kinase [EC:2.7.11.1]
Rhodococcus jostii RHA1	pRHL1	RHA1_RS35960	K00483	7e-207	4-hydroxyphenylacetate 3-monooxygenase [EC:1.14.14.9]
Rhodococcus jostii RHA1	pRHL1	RHA1_RS35970	K00446	1.7e-93	catechol 2,3-dioxygenase [EC:1.13.11.2]
Rhodococcus jostii RHA1	pRHL1	RHA1_RS35980	K10216	1.7e-125	2-hydroxymuconate-semialdehyde hydrolase [EC:3.7.1.9]
Rhodococcus jostii RHA1	pRHL1	RHA1_RS46835	K18955	3.2e-24	WhiB family transcriptional regulator, redox-sensing transcriptional regulator
Rhodococcus jostii RHA1	pRHL1	RHA1_RS35990	K01666	1.3e-147	4-hydroxy 2-oxovalerate aldolase [EC:4.1.3.39]
Rhodococcus jostii RHA1	pRHL1	RHA1_RS35995	K04073	3.8e-148	acetaldehyde dehydrogenase [EC:1.2.1.10]
Rhodococcus jostii RHA1	pRHL1	RHA1_RS36000	K02554	4.6e-101	2-keto-4-pentenoate hydratase [EC:4.2.1.80]
Rhodococcus jostii RHA1	pRHL1	RHA1_RS36015	K21685	1.6e-97	LuxR family transcriptional regulator, regulator of acetate metabolism
Rhodococcus jostii RHA1	pRHL1	RHA1_RS36020	K00146	1.4e-218	phenylacetaldehyde dehydrogenase [EC:1.2.1.39]
Rhodococcus jostii RHA1	pRHL1	RHA1_RS36020	K00128	5.7e-196	aldehyde dehydrogenase (NAD+) [EC:1.2.1.3]
Rhodococcus jostii RHA1	pRHL1	RHA1_RS36035	K00375	2.3e-181	GntR family transcriptional regulator / MocR family aminotransferase
Rhodococcus jostii RHA1	pRHL1	RHA1_RS36075	K14063	2.4e-58	AraC family transcriptional regulator, positive regulator of tynA and feaB
Rhodococcus jostii RHA1	pRHL1	RHA1_RS36105	K07727	4.4e-15	putative transcriptional regulator
Rhodococcus jostii RHA1	pRHL1	RHA1_RS36185	K03791	7.7e-56	putative chitinase
Rhodococcus jostii RHA1	pRHL1	RHA1_RS36190	K07273	3.3e-36	lysozyme
Rhodococcus jostii RHA1	pRHL1	RHA1_RS36250	K01046	4.5e-30	triacylglycerol lipase [EC:3.1.1.3]
Rhodococcus jostii RHA1	pRHL1	RHA1_RS36295	K23948	2e-152	NADH:quinone reductase (non-electrogenic) [EC:1.6.5.9]
Rhodococcus jostii RHA1	pRHL1	RHA1_RS36295	K00459	6.3e-68	nitronate monooxygenase [EC:1.13.12.16]
Rhodococcus jostii RHA1	pRHL1	RHA1_RS36335	K14519	5.2e-212	NADP-dependent aldehyde dehydrogenase [EC:1.2.1.4]
Rhodococcus jostii RHA1	pRHL1	RHA1_RS36340	K01796	1.6e-132	alpha-methylacyl-CoA racemase [EC:5.1.99.4]
Rhodococcus jostii RHA1	pRHL1	RHA1_RS36345	K00249	1.3e-106	acyl-CoA dehydrogenase [EC:1.3.8.7]
Rhodococcus jostii RHA1	pRHL1	RHA1_RS36360	K18581	7.5e-90	unsaturated chondroitin disaccharide hydrolase [EC:3.2.1.180]
Rhodococcus jostii RHA1	pRHL1	RHA1_RS36365	K21685	5.6e-38	LuxR family transcriptional regulator, regulator of acetate metabolism
Rhodococcus jostii RHA1	pRHL1	RHA1_RS36375	K08172	4.1e-164	MFS transporter, MHS family, shikimate and dehydroshikimate transport protein
Rhodococcus jostii RHA1	pRHL1	RHA1_RS36385	K18256	3.2e-100	3,4-dihydroxyphthalate decarboxylase [EC:4.1.1.69]
Rhodococcus jostii RHA1	pRHL1	RHA1_RS36390	K00529	6.2e-134	3-phenylpropionate/trans-cinnamate dioxygenase ferredoxin reductase component [EC:1.18.1.3]
Rhodococcus jostii RHA1	pRHL1	RHA1_RS36395	K05337	1.6e-12	ferredoxin
Rhodococcus jostii RHA1	pRHL1	RHA1_RS36425	K13995	8e-87	maleamate amidohydrolase [EC:3.5.1.107]
Rhodococcus jostii RHA1	pRHL1	RHA1_RS36430	K02050	3.7e-45	NitT/TauT family transport system permease protein
Rhodococcus jostii RHA1	pRHL1	RHA1_RS36440	K02049	2.3e-111	NitT/TauT family transport system ATP-binding protein
Rhodococcus jostii RHA1	pRHL1	RHA1_RS36455	K02624	5e-88	IclR family transcriptional regulator, pca regulon regulatory protein
Rhodococcus jostii RHA1	pRHL1	RHA1_RS36460	K16319	2.7e-170	anthranilate 1,2-dioxygenase large subunit [EC:1.14.12.1]
Rhodococcus jostii RHA1	pRHL1	RHA1_RS36465	K16320	2.5e-59	anthranilate 1,2-dioxygenase small subunit [EC:1.14.12.1]
Rhodococcus jostii RHA1	pRHL1	RHA1_RS36475	K00523	3.8e-128	CDP-4-dehydro-6-deoxyglucose reductase, E3 [EC:1.17.1.1]
Rhodococcus jostii RHA1	pRHL1	RHA1_RS36480	K08195	3.2e-150	MFS transporter, AAHS family, 4-hydroxybenzoate transporter
Rhodococcus jostii RHA1	pRHL1	RHA1_RS36490	K07492	4.8e-75	putative transposase
Rhodococcus jostii RHA1	pRHL1	RHA1_RS36495	K07482	1.6e-114	transposase, IS30 family
Rhodococcus jostii RHA1	pRHL1	RHA1_RS36500	K18371	0	acetone monooxygenase (methyl acetate-forming) [EC:1.14.13.226]
Rhodococcus jostii RHA1	pRHL1	RHA1_RS36505	K00641	9.2e-86	homoserine O-acetyltransferase/O-succinyltransferase [EC:2.3.1.31 2.3.1.46]
Rhodococcus jostii RHA1	pRHL1	RHA1_RS36570	K05795	3.6e-102	tellurium resistance protein TerD
Rhodococcus jostii RHA1	pRHL1	RHA1_RS36575	K09799	2.9e-157	uncharacterized protein
Rhodococcus jostii RHA1	pRHL1	RHA1_RS45375	K05792	1e-146	tellurite resistance protein TerA
Rhodococcus jostii RHA1	pRHL1	RHA1_RS36595	K10439	1.4e-68	ribose transport system substrate-binding protein
Rhodococcus jostii RHA1	pRHL1	RHA1_RS36610	K12466	9.4e-117	(+)-trans-carveol dehydrogenase [EC:1.1.1.275]
Rhodococcus jostii RHA1	pRHL1	RHA1_RS36615	K08172	6.6e-164	MFS transporter, MHS family, shikimate and dehydroshikimate transport protein
Rhodococcus jostii RHA1	pRHL1	RHA1_RS36725	K18955	7.3e-30	WhiB family transcriptional regulator, redox-sensing transcriptional regulator
Rhodococcus jostii RHA1	pRHL1	RHA1_RS36770	K04047	9.5e-44	starvation-inducible DNA-binding protein
Rhodococcus jostii RHA1	pRHL1	RHA1_RS50825	K18955	1.5e-26	WhiB family transcriptional regulator, redox-sensing transcriptional regulator
Rhodococcus jostii RHA1	pRHL1	RHA1_RS36815	K03781	1.3e-231	catalase [EC:1.11.1.6]
Rhodococcus jostii RHA1	pRHL1	RHA1_RS36820	K09780	9.7e-19	uncharacterized protein
Rhodococcus jostii RHA1	pRHL1	RHA1_RS36830	K01607	4.6e-07	4-carboxymuconolactone decarboxylase [EC:4.1.1.44]
Rhodococcus jostii RHA1	pRHL1	RHA1_RS36835	K01681	0	aconitate hydratase [EC:4.2.1.3]
Rhodococcus jostii RHA1	pRHL1	RHA1_RS36845	K00240	1.6e-44	succinate dehydrogenase / fumarate reductase, iron-sulfur subunit [EC:1.3.5.1 1.3.5.4]
Rhodococcus jostii RHA1	pRHL1	RHA1_RS36880	K00529	1.2e-159	3-phenylpropionate/trans-cinnamate dioxygenase ferredoxin reductase component [EC:1.18.1.3]
Rhodococcus jostii RHA1	pRHL1	RHA1_RS36885	K00616	6.6e-64	transaldolase [EC:2.2.1.2]
Rhodococcus jostii RHA1	pRHL1	RHA1_RS36905	K01495	3e-74	GTP cyclohydrolase IA [EC:3.5.4.16]
Rhodococcus jostii RHA1	pRHL1	RHA1_RS36920	K05524	2.4e-35	ferredoxin
Rhodococcus jostii RHA1	pRHL1	RHA1_RS36925	K02274	7.9e-275	cytochrome c oxidase subunit I [EC:7.1.1.9]
Rhodococcus jostii RHA1	pRHL1	RHA1_RS36955	K07816	1.1e-83	GTP pyrophosphokinase [EC:2.7.6.5]
Rhodococcus jostii RHA1	pRHL1	RHA1_RS36980	K01673	1.7e-44	carbonic anhydrase [EC:4.2.1.1]
Rhodococcus jostii RHA1	pRHL1	RHA1_RS36995	K07493	3.8e-60	putative transposase
Rhodococcus jostii RHA1	pRHL1	RHA1_RS37000	K07482	1.9e-114	transposase, IS30 family
Rhodococcus jostii RHA1	pRHL1	RHA1_RS37005	K07493	8.1e-21	putative transposase
Rhodococcus jostii RHA1	pRHL1	RHA1_RS37015	K07727	4.2e-14	putative transcriptional regulator
Rhodococcus jostii RHA1	pRHL1	RHA1_RS37025	K07493	1.8e-83	putative transposase
Rhodococcus jostii RHA1	pRHL1	RHA1_RS37030	K09780	7.8e-17	uncharacterized protein
Rhodococcus jostii RHA1	pRHL1	RHA1_RS37055	K22934	1.8e-166	alpha,alpha-trehalase [EC:3.2.1.28]
Rhodococcus jostii RHA1	pRHL1	RHA1_RS37060	K00156	3.7e-284	pyruvate dehydrogenase (quinone) [EC:1.2.5.1]
Rhodococcus jostii RHA1	pRHL1	RHA1_RS37100	K07494	1.4e-33	putative transposase
Rhodococcus jostii RHA1	pRHL1	RHA1_RS37115	K01585	1.4e-133	arginine decarboxylase [EC:4.1.1.19]
Rhodococcus jostii RHA1	pRHL1	RHA1_RS37120	K19200	3.2e-66	isopenicillin-N N-acyltransferase like protein
Rhodococcus jostii RHA1	pRHL1	RHA1_RS37130	K07001	3.3e-37	NTE family protein
Rhodococcus jostii RHA1	pRHL1	RHA1_RS37135	K07486	1.7e-37	transposase
Rhodococcus jostii RHA1	pRHL1	RHA1_RS37150	K02039	1.4e-52	phosphate transport system protein
Rhodococcus jostii RHA1	pRHL1	RHA1_RS37230	K13993	1.2e-34	HSP20 family protein
Rhodococcus jostii RHA1	pRHL1	RHA1_RS37235	K13640	2.9e-36	MerR family transcriptional regulator, heat shock protein HspR
Rhodococcus jostii RHA1	pRHL1	RHA1_RS47135	K18955	3.6e-24	WhiB family transcriptional regulator, redox-sensing transcriptional regulator
Rhodococcus jostii RHA1	pRHL1	RHA1_RS37295	K13993	5.4e-33	HSP20 family protein
Rhodococcus jostii RHA1	pRHL1	RHA1_RS37315	K04043	4.1e-285	molecular chaperone DnaK
Rhodococcus jostii RHA1	pRHL1	RHA1_RS37320	K03687	8e-41	molecular chaperone GrpE
Rhodococcus jostii RHA1	pRHL1	RHA1_RS37325	K03686	8e-129	molecular chaperone DnaJ
Rhodococcus jostii RHA1	pRHL1	RHA1_RS44920	K00635	4.7e-58	diacylglycerol O-acyltransferase / wax synthase [EC:2.3.1.20 2.3.1.75]
Rhodococcus jostii RHA1	pRHL1	RHA1_RS37390	K06048	3.8e-129	glutamate---cysteine ligase / carboxylate-amine ligase [EC:6.3.2.2 6.3.-.-]
Rhodococcus jostii RHA1	pRHL1	RHA1_RS37415	K19267	1.4e-38	NAD(P)H dehydrogenase (quinone) [EC:1.6.5.2]
Rhodococcus jostii RHA1	pRHL1	RHA1_RS37425	K07171	2.8e-14	mRNA interferase MazF [EC:3.1.-.-]
Rhodococcus jostii RHA1	pRHL1	RHA1_RS37435	K07498	2.3e-95	putative transposase
Rhodococcus jostii RHA1	pRHL1	RHA1_RS37455	K07497	6e-17	putative transposase
Rhodococcus jostii RHA1	pRHL1	RHA1_RS37460	K07486	6.8e-62	transposase
Rhodococcus jostii RHA1	pRHL1	RHA1_RS37525	K03791	3e-56	putative chitinase
Rhodococcus jostii RHA1	pRHL1	RHA1_RS44930	K07273	2.4e-36	lysozyme
Rhodococcus jostii RHA1	pRHL1	RHA1_RS37600	K01046	3.1e-29	triacylglycerol lipase [EC:3.1.1.3]
Rhodococcus jostii RHA1	pRHL1	RHA1_RS37640	K00635	9.4e-46	diacylglycerol O-acyltransferase / wax synthase [EC:2.3.1.20 2.3.1.75]
Rhodococcus jostii RHA1	pRHL1	RHA1_RS37655	K07493	3e-86	putative transposase
Rhodococcus jostii RHA1	pRHL1	RHA1_RS37665	K00249	6.4e-131	acyl-CoA dehydrogenase [EC:1.3.8.7]
Rhodococcus jostii RHA1	pRHL1	RHA1_RS37670	K02182	1e-202	carnitine-CoA ligase [EC:6.2.1.48]
Rhodococcus jostii RHA1	pRHL1	RHA1_RS37690	K00217	1.4e-98	maleylacetate reductase [EC:1.3.1.32]
Rhodococcus jostii RHA1	pRHL1	RHA1_RS37695	K22108	8.8e-43	TetR/AcrR family transcriptional regulator, cholesterol catabolism regulator
Rhodococcus jostii RHA1	pRHL1	RHA1_RS37700	K00344	2.3e-98	NADPH:quinone reductase [EC:1.6.5.5]
Rhodococcus jostii RHA1	pRHL1	RHA1_RS37715	K00059	2.8e-83	3-oxoacyl-[acyl-carrier protein] reductase [EC:1.1.1.100]
Rhodococcus jostii RHA1	pRHL1	RHA1_RS37720	K08683	1.2e-110	3-hydroxyacyl-CoA dehydrogenase / 3-hydroxy-2-methylbutyryl-CoA dehydrogenase [EC:1.1.1.35 1.1.1.178]
Rhodococcus jostii RHA1	pRHL1	RHA1_RS37765	K00666	4.2e-178	fatty-acyl-CoA synthase [EC:6.2.1.-]
Rhodococcus jostii RHA1	pRHL1	RHA1_RS37770	K00283	1.2e-161	glycine dehydrogenase subunit 2 [EC:1.4.4.2]
Rhodococcus jostii RHA1	pRHL1	RHA1_RS37775	K00282	9.7e-131	glycine dehydrogenase subunit 1 [EC:1.4.4.2]
Rhodococcus jostii RHA1	pRHL1	RHA1_RS37805	K16238	3.4e-186	ethanolamine permease
Rhodococcus jostii RHA1	pRHL1	RHA1_RS37810	K00276	1.7e-220	primary-amine oxidase [EC:1.4.3.21]
Rhodococcus jostii RHA1	pRHL1	RHA1_RS37860	K04763	1.6e-57	integrase/recombinase XerD
Rhodococcus jostii RHA1	pRHL1	RHA1_RS37865	K07493	1.3e-179	putative transposase
Rhodococcus jostii RHA1	pRHL1	RHA1_RS37905	K07494	1.4e-33	putative transposase
Rhodococcus jostii RHA1	pRHL1	RHA1_RS37910	K07481	1.3e-48	transposase, IS5 family
Rhodococcus jostii RHA1	pRHL1	RHA1_RS37950	K10439	5.2e-63	ribose transport system substrate-binding protein
Rhodococcus jostii RHA1	pRHL1	RHA1_RS37970	K00059	3.4e-83	3-oxoacyl-[acyl-carrier protein] reductase [EC:1.1.1.100]
Rhodococcus jostii RHA1	pRHL1	RHA1_RS37980	K00217	6.6e-152	maleylacetate reductase [EC:1.3.1.32]
Rhodococcus jostii RHA1	pRHL1	RHA1_RS37985	K04098	2.2e-129	hydroxyquinol 1,2-dioxygenase [EC:1.13.11.37]
Rhodococcus jostii RHA1	pRHL1	RHA1_RS37985	K03381	1.7e-102	catechol 1,2-dioxygenase [EC:1.13.11.1]
Rhodococcus jostii RHA1	pRHL1	RHA1_RS37990	K00038	3.3e-90	3alpha(or 20beta)-hydroxysteroid dehydrogenase [EC:1.1.1.53]
Rhodococcus jostii RHA1	pRHL1	RHA1_RS38015	K07171	6.7e-23	mRNA interferase MazF [EC:3.1.-.-]
Rhodococcus jostii RHA1	pRHL1	RHA1_RS38020	K19267	7.1e-41	NAD(P)H dehydrogenase (quinone) [EC:1.6.5.2]
Rhodococcus jostii RHA1	pRHL1	RHA1_RS38055	K14060	3e-47	putative DNA-invertase from lambdoid prophage Rac
Rhodococcus jostii RHA1	pRHL1	RHA1_RS38080	K07482	4.2e-62	transposase, IS30 family
Rhodococcus jostii RHA1	pRHL1	RHA1_RS38105	K21397	0	ABC transport system ATP-binding/permease protein
Rhodococcus jostii RHA1	pRHL1	RHA1_RS38115	K12132	5.6e-90	eukaryotic-like serine/threonine-protein kinase [EC:2.7.11.1]
Rhodococcus jostii RHA1	pRHL1	RHA1_RS38115	K11912	4e-20	serine/threonine-protein kinase PpkA [EC:2.7.11.1]
Rhodococcus jostii RHA1	pRHL1	RHA1_RS38120	K07497	1.3e-52	putative transposase
Rhodococcus jostii RHA1	pRHL1	RHA1_RS38120	K07483	1.4e-26	transposase
Rhodococcus jostii RHA1	pRHL1	RHA1_RS38130	K02012	1.4e-76	iron(III) transport system substrate-binding protein
Rhodococcus jostii RHA1	pRHL1	RHA1_RS38135	K02011	4.6e-112	iron(III) transport system permease protein
Rhodococcus jostii RHA1	pRHL1	RHA1_RS38140	K07225	1.4e-24	putative hemin transport protein
Rhodococcus jostii RHA1	pRHL1	RHA1_RS38160	K02483	4e-77	two-component system, OmpR family, response regulator
Rhodococcus jostii RHA1	pRHL1	RHA1_RS38175	K03975	7.7e-82	membrane-associated protein
Rhodococcus jostii RHA1	pRHL1	RHA1_RS38180	K19302	4.8e-29	undecaprenyl-diphosphatase [EC:3.6.1.27]
Rhodococcus jostii RHA1	pRHL1	RHA1_RS38195	K07114	8.5e-38	Ca-activated chloride channel homolog
Rhodococcus jostii RHA1	pRHL1	RHA1_RS38270	K07058	3.2e-50	membrane protein
Rhodococcus jostii RHA1	pRHL1	RHA1_RS38345	K07481	1.2e-49	transposase, IS5 family
Rhodococcus jostii RHA1	pRHL1	RHA1_RS38350	K07494	1.2e-32	putative transposase
Rhodococcus jostii RHA1	pRHL1	RHA1_RS38355	K06996	1e-32	uncharacterized protein
Rhodococcus jostii RHA1	pRHL1	RHA1_RS38375	K07493	3e-86	putative transposase
Rhodococcus jostii RHA1	pRHL1	RHA1_RS38390	K03497	6.1e-34	ParB family transcriptional regulator, chromosome partitioning protein
Rhodococcus jostii RHA1	pRHL1	RHA1_RS38405	K07494	3.8e-34	putative transposase
Rhodococcus jostii RHA1	pRHL1	RHA1_RS47370	K07492	1.5e-31	putative transposase
Rhodococcus jostii RHA1	pRHL1	RHA1_RS38475	K01939	1.3e-72	adenylosuccinate synthase [EC:6.3.4.4]
Rhodococcus jostii RHA1	pRHL1	RHA1_RS38490	K03704	1e-36	cold shock protein
Rhodococcus jostii RHA1	pRHL1	RHA1_RS38500	K01438	7.2e-93	acetylornithine deacetylase [EC:3.5.1.16]
Rhodococcus jostii RHA1	pRHL1	RHA1_RS38520	K01574	4.7e-35	acetoacetate decarboxylase [EC:4.1.1.4]
Rhodococcus jostii RHA1	pRHL1	RHA1_RS38525	K03762	9.6e-158	MFS transporter, MHS family, proline/betaine transporter
Rhodococcus jostii RHA1	pRHL1	RHA1_RS38530	K13955	1.5e-105	zinc-binding alcohol dehydrogenase/oxidoreductase
Rhodococcus jostii RHA1	pRHL1	RHA1_RS38535	K09022	5.5e-26	2-iminobutanoate/2-iminopropanoate deaminase [EC:3.5.99.10]
Rhodococcus jostii RHA1	pRHL1	RHA1_RS38555	K12466	3.3e-131	(+)-trans-carveol dehydrogenase [EC:1.1.1.275]
Rhodococcus jostii RHA1	pRHL1	RHA1_RS38565	K03718	1.2e-51	Lrp/AsnC family transcriptional regulator, regulator for asnA, asnC and gidA
Rhodococcus jostii RHA1	pRHL1	RHA1_RS38570	K18382	3.8e-164	NAD+-dependent secondary alcohol dehydrogenase Adh1 [EC:1.1.1.-]
Rhodococcus jostii RHA1	pRHL1	RHA1_RS38570	K13953	1.8e-101	alcohol dehydrogenase, propanol-preferring [EC:1.1.1.1]
Rhodococcus jostii RHA1	pRHL1	RHA1_RS38580	K00529	9.3e-129	3-phenylpropionate/trans-cinnamate dioxygenase ferredoxin reductase component [EC:1.18.1.3]
Rhodococcus jostii RHA1	pRHL1	RHA1_RS38585	K05337	1.5e-16	ferredoxin
Rhodococcus jostii RHA1	pRHL1	RHA1_RS38600	K01644	1.1e-50	citrate lyase subunit beta / citryl-CoA lyase [EC:4.1.3.34]
Rhodococcus jostii RHA1	pRHL1	RHA1_RS38620	K00635	7.6e-140	diacylglycerol O-acyltransferase / wax synthase [EC:2.3.1.20 2.3.1.75]
Rhodococcus jostii RHA1	pRHL1	RHA1_RS47385	K07493	2.6e-24	putative transposase
Rhodococcus jostii RHA1	pRHL1	RHA1_RS38665	K03897	6.5e-151	lysine N6-hydroxylase [EC:1.14.13.59]
Rhodococcus jostii RHA1	pRHL1	RHA1_RS38690	K09919	2.1e-36	uncharacterized protein
Rhodococcus jostii RHA1	pRHL1	RHA1_RS38695	K00635	4.9e-120	diacylglycerol O-acyltransferase / wax synthase [EC:2.3.1.20 2.3.1.75]
Rhodococcus jostii RHA1	pRHL1	RHA1_RS38705	K14954	6.6e-83	lipoprotein LprG
Rhodococcus jostii RHA1	pRHL1	RHA1_RS38720	K19159	1.1e-30	antitoxin YefM
Rhodococcus jostii RHA1	pRHL1	RHA1_RS38725	K19158	4.7e-43	toxin YoeB [EC:3.1.-.-]
Rhodococcus jostii RHA1	pRHL1	RHA1_RS38735	K09118	0	uncharacterized protein
Rhodococcus jostii RHA1	pRHL1	RHA1_RS38840	K03466	2.5e-25	DNA segregation ATPase FtsK/SpoIIIE, S-DNA-T family
Rhodococcus jostii RHA1	pRHL1	RHA1_RS38875	K01458	1.2e-43	N-formylglutamate deformylase [EC:3.5.1.68]
Rhodococcus jostii RHA1	pRHL1	RHA1_RS47505	K07646	4.5e-71	two-component system, OmpR family, sensor histidine kinase KdpD [EC:2.7.13.3]
Rhodococcus jostii RHA1	pRHL1	RHA1_RS39045	K07497	9.4e-21	putative transposase
Rhodococcus jostii RHA1	pRHL1	RHA1_RS39070	K09946	9.9e-18	uncharacterized protein
Rhodococcus jostii RHA1	pRHL1	RHA1_RS39215	K00261	8.8e-166	glutamate dehydrogenase (NAD(P)+) [EC:1.4.1.3]
Rhodococcus jostii RHA1	pRHL1	RHA1_RS39235	K01644	9.8e-71	citrate lyase subunit beta / citryl-CoA lyase [EC:4.1.3.34]
Rhodococcus jostii RHA1	pRHL1	RHA1_RS39245	K00135	3.7e-227	succinate-semialdehyde dehydrogenase / glutarate-semialdehyde dehydrogenase [EC:1.2.1.16 1.2.1.79 1.2.1.20]
Rhodococcus jostii RHA1	pRHL1	RHA1_RS39255	K03298	1.8e-55	drug/metabolite transporter, DME family
Rhodococcus jostii RHA1	pRHL1	RHA1_RS39260	K11735	9e-200	GABA permease
Rhodococcus jostii RHA1	pRHL1	RHA1_RS39275	K03294	3.6e-157	basic amino acid/polyamine antiporter, APA family
Rhodococcus jostii RHA1	pRHL1	RHA1_RS39285	K08369	2e-152	MFS transporter, putative metabolite:H+ symporter
Rhodococcus jostii RHA1	pRHL1	RHA1_RS39295	K01560	2.5e-43	2-haloacid dehalogenase [EC:3.8.1.2]
Rhodococcus jostii RHA1	pRHL1	RHA1_RS39300	K07246	1.9e-166	tartrate dehydrogenase/decarboxylase / D-malate dehydrogenase [EC:1.1.1.93 4.1.1.73 1.1.1.83]
Rhodococcus jostii RHA1	pRHL1	RHA1_RS39315	K00459	7.9e-104	nitronate monooxygenase [EC:1.13.12.16]
Rhodococcus jostii RHA1	pRHL1	RHA1_RS39320	K03719	1.1e-48	Lrp/AsnC family transcriptional regulator, leucine-responsive regulatory protein
Rhodococcus jostii RHA1	pRHL1	RHA1_RS39350	K03522	6.1e-97	electron transfer flavoprotein alpha subunit
Rhodococcus jostii RHA1	pRHL1	RHA1_RS39350	K03521	4.5e-62	electron transfer flavoprotein beta subunit
Rhodococcus jostii RHA1	pRHL1	RHA1_RS39380	K01677	9.6e-102	fumarate hydratase subunit alpha [EC:4.2.1.2]
Rhodococcus jostii RHA1	pRHL1	RHA1_RS47620	K00241	9.5e-21	succinate dehydrogenase / fumarate reductase, cytochrome b subunit
Rhodococcus jostii RHA1	pRHL1	RHA1_RS39400	K00240	5e-71	succinate dehydrogenase / fumarate reductase, iron-sulfur subunit [EC:1.3.5.1 1.3.5.4]
Rhodococcus jostii RHA1	pRHL1	RHA1_RS39410	K08172	1.1e-152	MFS transporter, MHS family, shikimate and dehydroshikimate transport protein
Rhodococcus jostii RHA1	pRHL1	RHA1_RS39430	K07497	1.7e-48	putative transposase
Rhodococcus jostii RHA1	pRHL1	RHA1_RS39430	K07483	7.7e-19	transposase
Rhodococcus jostii RHA1	pRHL1	RHA1_RS39445	K07090	4.1e-19	uncharacterized protein
Rhodococcus jostii RHA1	pRHL1	RHA1_RS47660	K18955	8.5e-27	WhiB family transcriptional regulator, redox-sensing transcriptional regulator
Rhodococcus jostii RHA1	pRHL1	RHA1_RS39450	K03885	6.1e-148	NADH:ubiquinone reductase (H+-translocating) [EC:7.1.1.2]
Rhodococcus jostii RHA1	pRHL1	RHA1_RS39465	K00020	1e-69	3-hydroxyisobutyrate dehydrogenase [EC:1.1.1.31]
Rhodococcus jostii RHA1	pRHL1	RHA1_RS39475	K16846	4.7e-199	(2R)-sulfolactate sulfo-lyase subunit beta [EC:4.4.1.24]
Rhodococcus jostii RHA1	pRHL1	RHA1_RS39480	K16845	4.8e-30	(2R)-sulfolactate sulfo-lyase subunit alpha [EC:4.4.1.24]
Rhodococcus jostii RHA1	pRHL1	RHA1_RS39485	K05799	1.4e-57	GntR family transcriptional regulator, transcriptional repressor for pyruvate dehydrogenase complex
Rhodococcus jostii RHA1	pRHL1	RHA1_RS39505	K08282	1.4e-87	non-specific serine/threonine protein kinase [EC:2.7.11.1]
Rhodococcus jostii RHA1	pRHL1	RHA1_RS39505	K12132	2.1e-86	eukaryotic-like serine/threonine-protein kinase [EC:2.7.11.1]
Rhodococcus jostii RHA1	pRHL1	RHA1_RS39520	K13021	2e-165	MFS transporter, ACS family, tartrate transporter
Rhodococcus jostii RHA1	pRHL1	RHA1_RS39550	K07483	2.1e-14	transposase
Rhodococcus jostii RHA1	pRHL1	RHA1_RS39585	K00626	5.5e-125	acetyl-CoA C-acetyltransferase [EC:2.3.1.9]
Rhodococcus jostii RHA1	pRHL1	RHA1_RS39600	K08172	1.3e-182	MFS transporter, MHS family, shikimate and dehydroshikimate transport protein
Rhodococcus jostii RHA1	pRHL1	RHA1_RS39605	K07068	7.5e-39	uncharacterized protein
Rhodococcus jostii RHA1	pRHL1	RHA1_RS39610	K00626	7.5e-28	acetyl-CoA C-acetyltransferase [EC:2.3.1.9]
Rhodococcus jostii RHA1	pRHL1	RHA1_RS39620	K03671	3.1e-33	thioredoxin 1
Rhodococcus jostii RHA1	pRHL1	RHA1_RS39625	K01607	4.2e-05	4-carboxymuconolactone decarboxylase [EC:4.1.1.44]
Rhodococcus jostii RHA1	pRHL1	RHA1_RS39635	K07397	3.4e-19	putative redox protein
Rhodococcus jostii RHA1	pRHL1	RHA1_RS47695	K18955	1.6e-27	WhiB family transcriptional regulator, redox-sensing transcriptional regulator
Rhodococcus jostii RHA1	pRHL1	RHA1_RS39645	K14155	1.2e-139	cysteine-S-conjugate beta-lyase [EC:4.4.1.13]
Rhodococcus jostii RHA1	pRHL1	RHA1_RS39650	K03719	3.4e-52	Lrp/AsnC family transcriptional regulator, leucine-responsive regulatory protein
Rhodococcus jostii RHA1	pRHL1	RHA1_RS39655	K11738	5.1e-217	L-asparagine permease
Rhodococcus jostii RHA1	pRHL1	RHA1_RS39675	K13419	0	serine/threonine-protein kinase PknK [EC:2.7.11.1]
Rhodococcus jostii RHA1	pRHL1	RHA1_RS39675	K03556	4.4e-119	LuxR family transcriptional regulator, maltose regulon positive regulatory protein
Rhodococcus jostii RHA1	pRHL1	RHA1_RS39675	K12132	3.4e-84	eukaryotic-like serine/threonine-protein kinase [EC:2.7.11.1]
Rhodococcus jostii RHA1	pRHL1	RHA1_RS39690	K01069	4.3e-51	hydroxyacylglutathione hydrolase [EC:3.1.2.6]
Rhodococcus jostii RHA1	pRHL1	RHA1_RS47725	K07090	1.8e-45	uncharacterized protein
Rhodococcus jostii RHA1	pRHL1	RHA1_RS47735	K03710	1.7e-54	GntR family transcriptional regulator
Rhodococcus jostii RHA1	pRHL1	RHA1_RS39735	K17218	1.7e-157	sulfide:quinone oxidoreductase [EC:1.8.5.4]
Rhodococcus jostii RHA1	pRHL1	RHA1_RS39740	K07397	3.1e-23	putative redox protein
Rhodococcus jostii RHA1	pRHL1	RHA1_RS39755	K00138	3.1e-293	aldehyde dehydrogenase [EC:1.2.1.-]
Rhodococcus jostii RHA1	pRHL1	RHA1_RS39760	K09959	1.3e-75	uncharacterized protein
Rhodococcus jostii RHA1	pRHL1	RHA1_RS39765	K01966	2.2e-267	propionyl-CoA carboxylase beta chain [EC:6.4.1.3 2.1.3.15]
Rhodococcus jostii RHA1	pRHL1	RHA1_RS39780	K01908	0	propionyl-CoA synthetase [EC:6.2.1.17]
Rhodococcus jostii RHA1	pRHL1	RHA1_RS47790	K18955	1.2e-28	WhiB family transcriptional regulator, redox-sensing transcriptional regulator
Rhodococcus jostii RHA1	pRHL1	RHA1_RS39800	K00027	3.8e-161	malate dehydrogenase (oxaloacetate-decarboxylating) [EC:1.1.1.38]
Rhodococcus jostii RHA1	pRHL1	RHA1_RS39845	K17218	1.1e-156	sulfide:quinone oxidoreductase [EC:1.8.5.4]
Rhodococcus jostii RHA1	pRHL1	RHA1_RS39855	K07397	3.1e-23	putative redox protein
Rhodococcus jostii RHA1	pRHL1	RHA1_RS39865	K01692	7.1e-70	enoyl-CoA hydratase [EC:4.2.1.17]
Rhodococcus jostii RHA1	pRHL1	RHA1_RS39870	K00666	1.2e-169	fatty-acyl-CoA synthase [EC:6.2.1.-]
Rhodococcus jostii RHA1	pRHL1	RHA1_RS39870	K01897	5.7e-136	long-chain acyl-CoA synthetase [EC:6.2.1.3]
Rhodococcus jostii RHA1	pRHL1	RHA1_RS45050	K07497	8.7e-14	putative transposase
Rhodococcus jostii RHA1	pRHL1	RHA1_RS50005	K06889	3.2e-41	uncharacterized protein
Rhodococcus jostii RHA1	pRHL1	RHA1_RS47850	K16048	7.4e-75	3-hydroxy-9,10-secoandrosta-1,3,5(10)-triene-9,17-dione monooxygenase reductase component [EC:1.5.1.-]
Rhodococcus jostii RHA1	pRHL1	RHA1_RS39930	K11477	2e-39	glc operon protein GlcG
Rhodococcus jostii RHA1	pRHL1	RHA1_RS39945	K00108	2.9e-187	choline dehydrogenase [EC:1.1.99.1]
Rhodococcus jostii RHA1	pRHL1	RHA1_RS39960	K01904	3.7e-189	4-coumarate--CoA ligase [EC:6.2.1.12]
Rhodococcus jostii RHA1	pRHL1	RHA1_RS39970	K07486	6.2e-52	transposase
Rhodococcus jostii RHA1	pRHL1	RHA1_RS40020	K00529	1.6e-124	3-phenylpropionate/trans-cinnamate dioxygenase ferredoxin reductase component [EC:1.18.1.3]
Rhodococcus jostii RHA1	pRHL1	RHA1_RS45075	K01995	1.8e-96	branched-chain amino acid transport system ATP-binding protein
Rhodococcus jostii RHA1	pRHL1	RHA1_RS45075	K01998	1.1e-83	branched-chain amino acid transport system permease protein
Rhodococcus jostii RHA1	pRHL1	RHA1_RS45075	K01997	1.7e-56	branched-chain amino acid transport system permease protein
Rhodococcus jostii RHA1	pRHL1	RHA1_RS40080	K01822	5.7e-34	steroid Delta-isomerase [EC:5.3.3.1]
Rhodococcus jostii RHA1	pRHL1	RHA1_RS40085	K15983	2.2e-131	3-ketosteroid 9alpha-monooxygenase subunit B [EC:1.14.15.30]
Rhodococcus jostii RHA1	pRHL1	RHA1_RS40090	K15982	1.8e-156	3-ketosteroid 9alpha-monooxygenase subunit A [EC:1.14.15.30]
Rhodococcus jostii RHA1	pRHL1	RHA1_RS40095	K16047	2.8e-143	3-hydroxy-9,10-secoandrosta-1,3,5(10)-triene-9,17-dione monooxygenase [EC:1.14.14.12]
Rhodococcus jostii RHA1	pRHL1	RHA1_RS40100	K16049	4.6e-130	3,4-dihydroxy-9,10-secoandrosta-1,3,5(10)-triene-9,17-dione 4,5-dioxygenase [EC:1.13.11.25]
Rhodococcus jostii RHA1	pRHL1	RHA1_RS40110	K13775	1.5e-69	citronellol/citronellal dehydrogenase
Rhodococcus jostii RHA1	pRHL1	RHA1_RS40120	K07494	3.1e-34	putative transposase
Rhodococcus jostii RHA1	pRHL1	RHA1_RS40125	K01066	4.6e-89	acetyl esterase [EC:3.1.1.-]
Rhodococcus jostii RHA1	pRHL1	RHA1_RS40130	K16048	2.5e-73	3-hydroxy-9,10-secoandrosta-1,3,5(10)-triene-9,17-dione monooxygenase reductase component [EC:1.5.1.-]
Rhodococcus jostii RHA1	pRHL1	RHA1_RS40165	K01666	1.8e-131	4-hydroxy 2-oxovalerate aldolase [EC:4.1.3.39]
Rhodococcus jostii RHA1	pRHL1	RHA1_RS40180	K05898	3.8e-217	3-oxosteroid 1-dehydrogenase [EC:1.3.99.4]
Rhodococcus jostii RHA1	pRHL1	RHA1_RS40190	K01066	9.8e-97	acetyl esterase [EC:3.1.1.-]
Rhodococcus jostii RHA1	pRHL1	RHA1_RS40235	K03379	6.2e-192	cyclohexanone monooxygenase [EC:1.14.13.22]
Rhodococcus jostii RHA1	pRHL1	RHA1_RS40240	K01066	1.2e-98	acetyl esterase [EC:3.1.1.-]
Rhodococcus jostii RHA1	pRHL1	RHA1_RS40255	K14520	2.4e-233	4-hydroxyacetophenone monooxygenase [EC:1.14.13.84]
Rhodococcus jostii RHA1	pRHL1	RHA1_RS40260	K05898	1.3e-221	3-oxosteroid 1-dehydrogenase [EC:1.3.99.4]
Rhodococcus jostii RHA1	pRHL1	RHA1_RS40280	K02032	2.3e-155	peptide/nickel transport system ATP-binding protein
Rhodococcus jostii RHA1	pRHL1	RHA1_RS40285	K02031	6.6e-140	peptide/nickel transport system ATP-binding protein
Rhodococcus jostii RHA1	pRHL1	RHA1_RS40290	K02034	3.8e-89	peptide/nickel transport system permease protein
Rhodococcus jostii RHA1	pRHL1	RHA1_RS40295	K02033	1.8e-99	peptide/nickel transport system permease protein
Rhodococcus jostii RHA1	pRHL1	RHA1_RS40300	K02035	1.4e-81	peptide/nickel transport system substrate-binding protein
Rhodococcus jostii RHA1	pRHL1	RHA1_RS40335	K14063	6.8e-84	AraC family transcriptional regulator, positive regulator of tynA and feaB
Rhodococcus jostii RHA1	pRHL1	RHA1_RS40355	K00384	3.4e-134	thioredoxin reductase (NADPH) [EC:1.8.1.9]
Rhodococcus jostii RHA1	pRHL1	RHA1_RS40365	K10680	1.4e-152	N-ethylmaleimide reductase [EC:1.-.-.-]
Rhodococcus jostii RHA1	pRHL1	RHA1_RS40370	K01607	2.1e-05	4-carboxymuconolactone decarboxylase [EC:4.1.1.44]
Rhodococcus jostii RHA1	pRHL1	RHA1_RS40375	K03671	6.6e-42	thioredoxin 1
Rhodococcus jostii RHA1	pRHL1	RHA1_RS40385	K22041	2.3e-57	TetR/AcrR family transcriptional regulator, copper-responsive repressor
Rhodococcus jostii RHA1	pRHL1	RHA1_RS40465	K14733	4.3e-153	limonene 1,2-monooxygenase [EC:1.14.13.107]
Rhodococcus jostii RHA1	pRHL1	RHA1_RS40470	K06893	3.9e-18	uncharacterized protein
Rhodococcus jostii RHA1	pRHL1	RHA1_RS40505	K01046	2.8e-28	triacylglycerol lipase [EC:3.1.1.3]
Rhodococcus jostii RHA1	pRHL1	RHA1_RS40535	K18955	4.8e-24	WhiB family transcriptional regulator, redox-sensing transcriptional regulator
Rhodococcus jostii RHA1	pRHL1	RHA1_RS40690	K07497	2e-10	putative transposase
Rhodococcus jostii RHA1	pRHL1	RHA1_RS48000	K01724	5.3e-18	4a-hydroxytetrahydrobiopterin dehydratase [EC:4.2.1.96]
Rhodococcus jostii RHA1	pRHL1	RHA1_RS45115	K07273	3.2e-37	lysozyme
Rhodococcus jostii RHA1	pRHL1	RHA1_RS40715	K03791	9.6e-56	putative chitinase
Rhodococcus jostii RHA1	pRHL1	RHA1_RS40755	K11021	4.4e-138	insecticidal toxin complex protein TccC
Rhodococcus jostii RHA1	pRHL2	RHA1_RS40825	K03496	1e-43	chromosome partitioning protein
Rhodococcus jostii RHA1	pRHL2	RHA1_RS40900	K03466	1.7e-19	DNA segregation ATPase FtsK/SpoIIIE, S-DNA-T family
Rhodococcus jostii RHA1	pRHL2	RHA1_RS40910	K07486	1.4e-51	transposase
Rhodococcus jostii RHA1	pRHL2	RHA1_RS40955	K01055	2.4e-60	3-oxoadipate enol-lactonase [EC:3.1.1.24]
Rhodococcus jostii RHA1	pRHL2	RHA1_RS41120	K18955	4.3e-32	WhiB family transcriptional regulator, redox-sensing transcriptional regulator
Rhodococcus jostii RHA1	pRHL2	RHA1_RS41135	K07494	4.9e-34	putative transposase
Rhodococcus jostii RHA1	pRHL2	RHA1_RS48100	K18831	1.1e-11	HTH-type transcriptional regulator / antitoxin HigA
Rhodococcus jostii RHA1	pRHL2	RHA1_RS41215	K07492	5.1e-31	putative transposase
Rhodococcus jostii RHA1	pRHL2	RHA1_RS41290	K01666	1.9e-148	4-hydroxy 2-oxovalerate aldolase [EC:4.1.3.39]
Rhodococcus jostii RHA1	pRHL2	RHA1_RS41300	K07492	5.1e-31	putative transposase
Rhodococcus jostii RHA1	pRHL2	RHA1_RS41315	K02554	1.8e-97	2-keto-4-pentenoate hydratase [EC:4.2.1.80]
Rhodococcus jostii RHA1	pRHL2	RHA1_RS41335	K02486	2.9e-157	two-component system, sensor kinase [EC:2.7.13.3]
Rhodococcus jostii RHA1	pRHL2	RHA1_RS41340	K00529	7.8e-135	3-phenylpropionate/trans-cinnamate dioxygenase ferredoxin reductase component [EC:1.18.1.3]
Rhodococcus jostii RHA1	pRHL2	RHA1_RS41345	K05711	1.7e-118	2,3-dihydroxy-2,3-dihydrophenylpropionate dehydrogenase [EC:1.3.1.87]
Rhodococcus jostii RHA1	pRHL2	RHA1_RS41350	K00135	2.2e-184	succinate-semialdehyde dehydrogenase / glutarate-semialdehyde dehydrogenase [EC:1.2.1.16 1.2.1.79 1.2.1.20]
Rhodococcus jostii RHA1	pRHL2	RHA1_RS41370	K14748	1.4e-216	ethylbenzene dioxygenase subunit alpha [EC:1.14.12.-]
Rhodococcus jostii RHA1	pRHL2	RHA1_RS41375	K14749	3e-67	ethylbenzene dioxygenase subunit beta [EC:1.14.12.-]
Rhodococcus jostii RHA1	pRHL2	RHA1_RS41380	K14751	2.9e-169	2,3-dihydroxyethylbenzene 1,2-dioxygenase [EC:1.13.11.-]
Rhodococcus jostii RHA1	pRHL2	RHA1_RS41385	K10216	6.5e-81	2-hydroxymuconate-semialdehyde hydrolase [EC:3.7.1.9]
Rhodococcus jostii RHA1	pRHL2	RHA1_RS41390	K02509	2.1e-121	2-oxo-hept-3-ene-1,7-dioate hydratase [EC:4.2.1.-]
Rhodococcus jostii RHA1	pRHL2	RHA1_RS41395	K02510	2.1e-105	4-hydroxy-2-oxoheptanedioate aldolase [EC:4.1.2.52]
Rhodococcus jostii RHA1	pRHL2	RHA1_RS41400	K06893	3.6e-17	uncharacterized protein
Rhodococcus jostii RHA1	pRHL2	RHA1_RS41420	K14748	1.4e-216	ethylbenzene dioxygenase subunit alpha [EC:1.14.12.-]
Rhodococcus jostii RHA1	pRHL2	RHA1_RS41425	K14749	3e-67	ethylbenzene dioxygenase subunit beta [EC:1.14.12.-]
Rhodococcus jostii RHA1	pRHL2	RHA1_RS41435	K18092	5e-126	2-hydroxy-6-oxo-octa-2,4-dienoate hydrolase [EC:3.7.1.-]
Rhodococcus jostii RHA1	pRHL2	RHA1_RS41435	K10216	1e-120	2-hydroxymuconate-semialdehyde hydrolase [EC:3.7.1.9]
Rhodococcus jostii RHA1	pRHL2	RHA1_RS41445	K02486	3e-151	two-component system, sensor kinase [EC:2.7.13.3]
Rhodococcus jostii RHA1	pRHL2	RHA1_RS48165	K07492	2.1e-20	putative transposase
Rhodococcus jostii RHA1	pRHL2	RHA1_RS41460	K07486	4e-50	transposase
Rhodococcus jostii RHA1	pRHL2	RHA1_RS41480	K10854	6.5e-272	acetone carboxylase, alpha subunit [EC:6.4.1.6]
Rhodococcus jostii RHA1	pRHL2	RHA1_RS41485	K01473	1.7e-193	N-methylhydantoinase A [EC:3.5.2.14]
Rhodococcus jostii RHA1	pRHL2	RHA1_RS41485	K10701	4.3e-71	acetophenone carboxylase [EC:6.4.1.8]
Rhodococcus jostii RHA1	pRHL2	RHA1_RS41490	K10856	1.5e-51	acetone carboxylase, gamma subunit [EC:6.4.1.6]
Rhodococcus jostii RHA1	pRHL2	RHA1_RS41495	K10701	2.2e-52	acetophenone carboxylase [EC:6.4.1.8]
Rhodococcus jostii RHA1	pRHL2	RHA1_RS41520	K11959	1.8e-102	urea transport system substrate-binding protein
Rhodococcus jostii RHA1	pRHL2	RHA1_RS41550	K07241	6.6e-106	nickel/cobalt transporter (NiCoT) family protein
Rhodococcus jostii RHA1	pRHL2	RHA1_RS41555	K18118	8.6e-255	succinyl-CoA:acetate CoA-transferase [EC:2.8.3.18]
Rhodococcus jostii RHA1	pRHL2	RHA1_RS41560	K07486	5.7e-16	transposase
Rhodococcus jostii RHA1	pRHL2	RHA1_RS41570	K00059	2.4e-81	3-oxoacyl-[acyl-carrier protein] reductase [EC:1.1.1.100]
Rhodococcus jostii RHA1	pRHL2	RHA1_RS41610	K00641	2.5e-86	homoserine O-acetyltransferase/O-succinyltransferase [EC:2.3.1.31 2.3.1.46]
Rhodococcus jostii RHA1	pRHL2	RHA1_RS41615	K18371	0	acetone monooxygenase (methyl acetate-forming) [EC:1.14.13.226]
Rhodococcus jostii RHA1	pRHL2	RHA1_RS41620	K07482	5.2e-126	transposase, IS30 family
Rhodococcus jostii RHA1	pRHL2	RHA1_RS41625	K07492	1.9e-74	putative transposase
Rhodococcus jostii RHA1	pRHL2	RHA1_RS41635	K00986	4.2e-88	RNA-directed DNA polymerase [EC:2.7.7.49]
Rhodococcus jostii RHA1	pRHL2	RHA1_RS41650	K08195	3.2e-150	MFS transporter, AAHS family, 4-hydroxybenzoate transporter
Rhodococcus jostii RHA1	pRHL2	RHA1_RS41655	K00523	3.8e-128	CDP-4-dehydro-6-deoxyglucose reductase, E3 [EC:1.17.1.1]
Rhodococcus jostii RHA1	pRHL2	RHA1_RS41665	K16320	2.5e-59	anthranilate 1,2-dioxygenase small subunit [EC:1.14.12.1]
Rhodococcus jostii RHA1	pRHL2	RHA1_RS41670	K16319	2.7e-170	anthranilate 1,2-dioxygenase large subunit [EC:1.14.12.1]
Rhodococcus jostii RHA1	pRHL2	RHA1_RS41675	K02624	5e-88	IclR family transcriptional regulator, pca regulon regulatory protein
Rhodococcus jostii RHA1	pRHL2	RHA1_RS41690	K02049	2.3e-111	NitT/TauT family transport system ATP-binding protein
Rhodococcus jostii RHA1	pRHL2	RHA1_RS41700	K02050	3.7e-45	NitT/TauT family transport system permease protein
Rhodococcus jostii RHA1	pRHL2	RHA1_RS41705	K13995	8e-87	maleamate amidohydrolase [EC:3.5.1.107]
Rhodococcus jostii RHA1	pRHL2	RHA1_RS41735	K05337	1.6e-12	ferredoxin
Rhodococcus jostii RHA1	pRHL2	RHA1_RS41740	K00529	6.2e-134	3-phenylpropionate/trans-cinnamate dioxygenase ferredoxin reductase component [EC:1.18.1.3]
Rhodococcus jostii RHA1	pRHL2	RHA1_RS41745	K18256	3.2e-100	3,4-dihydroxyphthalate decarboxylase [EC:4.1.1.69]
Rhodococcus jostii RHA1	pRHL2	RHA1_RS41755	K07498	1.3e-112	putative transposase
Rhodococcus jostii RHA1	pRHL2	RHA1_RS48240	K06893	1.2e-22	uncharacterized protein
Rhodococcus jostii RHA1	pRHL2	RHA1_RS41785	K01066	4.4e-86	acetyl esterase [EC:3.1.1.-]
Rhodococcus jostii RHA1	pRHL2	RHA1_RS41795	K00140	4.1e-217	malonate-semialdehyde dehydrogenase (acetylating) / methylmalonate-semialdehyde dehydrogenase [EC:1.2.1.18 1.2.1.27]
Rhodococcus jostii RHA1	pRHL2	RHA1_RS41810	K21961	9e-65	TetR/AcrR family transcriptional regulator, ethionamide resistance regulator
Rhodococcus jostii RHA1	pRHL2	RHA1_RS41815	K00666	4.8e-174	fatty-acyl-CoA synthase [EC:6.2.1.-]
Rhodococcus jostii RHA1	pRHL2	RHA1_RS41815	K01897	1.2e-140	long-chain acyl-CoA synthetase [EC:6.2.1.3]
Rhodococcus jostii RHA1	pRHL2	RHA1_RS41820	K08282	1.1e-88	non-specific serine/threonine protein kinase [EC:2.7.11.1]
Rhodococcus jostii RHA1	pRHL2	RHA1_RS41820	K12132	1.5e-78	eukaryotic-like serine/threonine-protein kinase [EC:2.7.11.1]
Rhodococcus jostii RHA1	pRHL2	RHA1_RS41845	K07492	8.1e-69	putative transposase
Rhodococcus jostii RHA1	pRHL2	RHA1_RS48275	K07068	4.5e-15	uncharacterized protein
Rhodococcus jostii RHA1	pRHL2	RHA1_RS41915	K07481	4.1e-32	transposase, IS5 family
Rhodococcus jostii RHA1	pRHL2	RHA1_RS41920	K07497	1.7e-48	putative transposase
Rhodococcus jostii RHA1	pRHL2	RHA1_RS41920	K07483	7.7e-19	transposase
Rhodococcus jostii RHA1	pRHL2	RHA1_RS41950	K18926	1.1e-157	MFS transporter, DHA2 family, lincomycin resistance protein
Rhodococcus jostii RHA1	pRHL2	RHA1_RS41955	K19267	9.4e-87	NAD(P)H dehydrogenase (quinone) [EC:1.6.5.2]
Rhodococcus jostii RHA1	pRHL2	RHA1_RS41965	K11163	1.3e-81	dehydrogenase/reductase SDR family member 1 [EC:1.1.-.-]
Rhodococcus jostii RHA1	pRHL2	RHA1_RS41970	K00004	6e-119	(R,R)-butanediol dehydrogenase / meso-butanediol dehydrogenase / diacetyl reductase [EC:1.1.1.4 1.1.1.- 1.1.1.303]
Rhodococcus jostii RHA1	pRHL2	RHA1_RS41980	K07493	2.4e-124	putative transposase
Rhodococcus jostii RHA1	pRHL2	RHA1_RS41990	K07497	1.7e-48	putative transposase
Rhodococcus jostii RHA1	pRHL2	RHA1_RS41990	K07483	7.7e-19	transposase
Rhodococcus jostii RHA1	pRHL2	RHA1_RS42045	K02510	7.4e-69	4-hydroxy-2-oxoheptanedioate aldolase [EC:4.1.2.52]
Rhodococcus jostii RHA1	pRHL2	RHA1_RS42115	K18688	5.1e-179	3-oxocholest-4-en-26-oate---CoA ligase [EC:6.2.1.42]
Rhodococcus jostii RHA1	pRHL2	RHA1_RS42125	K01912	6.4e-79	phenylacetate-CoA ligase [EC:6.2.1.30]
Rhodococcus jostii RHA1	pRHL2	RHA1_RS42135	K05337	8.4e-13	ferredoxin
Rhodococcus jostii RHA1	pRHL2	RHA1_RS42145	K07493	2.4e-124	putative transposase
Rhodococcus jostii RHA1	pRHL2	RHA1_RS42185	K10676	9.6e-224	2,4-dichlorophenol 6-monooxygenase [EC:1.14.13.20]
Rhodococcus jostii RHA1	pRHL2	RHA1_RS42200	K01692	4.7e-73	enoyl-CoA hydratase [EC:4.2.1.17]
Rhodococcus jostii RHA1	pRHL2	RHA1_RS42205	K08683	6.6e-91	3-hydroxyacyl-CoA dehydrogenase / 3-hydroxy-2-methylbutyryl-CoA dehydrogenase [EC:1.1.1.35 1.1.1.178]
Rhodococcus jostii RHA1	pRHL2	RHA1_RS42210	K00632	8.2e-152	acetyl-CoA acyltransferase [EC:2.3.1.16]
Rhodococcus jostii RHA1	pRHL2	RHA1_RS42210	K00626	2.6e-122	acetyl-CoA C-acetyltransferase [EC:2.3.1.9]
Rhodococcus jostii RHA1	pRHL2	RHA1_RS42215	K01692	1.7e-76	enoyl-CoA hydratase [EC:4.2.1.17]
Rhodococcus jostii RHA1	pRHL2	RHA1_RS42240	K01995	1.4e-120	branched-chain amino acid transport system ATP-binding protein
Rhodococcus jostii RHA1	pRHL2	RHA1_RS42240	K01997	1.2e-63	branched-chain amino acid transport system permease protein
Rhodococcus jostii RHA1	pRHL2	RHA1_RS42245	K01996	3.1e-98	branched-chain amino acid transport system ATP-binding protein
Rhodococcus jostii RHA1	pRHL2	RHA1_RS42265	K05799	1.6e-57	GntR family transcriptional regulator, transcriptional repressor for pyruvate dehydrogenase complex
Rhodococcus jostii RHA1	pRHL2	RHA1_RS42275	K00249	1.7e-109	acyl-CoA dehydrogenase [EC:1.3.8.7]
Rhodococcus jostii RHA1	pRHL2	RHA1_RS42285	K07492	5e-64	putative transposase
Rhodococcus jostii RHA1	pRHL2	RHA1_RS42295	K07068	5.6e-29	uncharacterized protein
Rhodococcus jostii RHA1	pRHL2	RHA1_RS42330	K00626	1.4e-19	acetyl-CoA C-acetyltransferase [EC:2.3.1.9]
Rhodococcus jostii RHA1	pRHL2	RHA1_RS42335	K05799	4.7e-55	GntR family transcriptional regulator, transcriptional repressor for pyruvate dehydrogenase complex
Rhodococcus jostii RHA1	pRHL2	RHA1_RS42355	K01495	2.2e-88	GTP cyclohydrolase IA [EC:3.5.4.16]
Rhodococcus jostii RHA1	pRHL2	RHA1_RS49145	K07492	1.4e-29	putative transposase
Rhodococcus jostii RHA1	pRHL2	RHA1_RS42370	K15977	2.6e-25	putative oxidoreductase
Rhodococcus jostii RHA1	pRHL2	RHA1_RS42385	K00249	2.2e-115	acyl-CoA dehydrogenase [EC:1.3.8.7]
Rhodococcus jostii RHA1	pRHL2	RHA1_RS42405	K08282	1.8e-89	non-specific serine/threonine protein kinase [EC:2.7.11.1]
Rhodococcus jostii RHA1	pRHL2	RHA1_RS42405	K12132	1.1e-80	eukaryotic-like serine/threonine-protein kinase [EC:2.7.11.1]
Rhodococcus jostii RHA1	pRHL2	RHA1_RS48410	K07492	1.3e-58	putative transposase
Rhodococcus jostii RHA1	pRHL2	RHA1_RS42515	K07493	2.4e-124	putative transposase
Rhodococcus jostii RHA1	pRHL2	RHA1_RS42520	K08282	2.5e-88	non-specific serine/threonine protein kinase [EC:2.7.11.1]
Rhodococcus jostii RHA1	pRHL2	RHA1_RS42520	K12132	1.1e-83	eukaryotic-like serine/threonine-protein kinase [EC:2.7.11.1]
Rhodococcus jostii RHA1	pRHL2	RHA1_RS42520	K03556	3.8e-44	LuxR family transcriptional regulator, maltose regulon positive regulatory protein
Rhodococcus jostii RHA1	pRHL2	RHA1_RS42565	K07160	1.3e-86	5-oxoprolinase (ATP-hydrolysing) subunit A [EC:3.5.2.9]
Rhodococcus jostii RHA1	pRHL2	RHA1_RS42570	K00666	1.5e-182	fatty-acyl-CoA synthase [EC:6.2.1.-]
Rhodococcus jostii RHA1	pRHL2	RHA1_RS42580	K03710	5.3e-52	GntR family transcriptional regulator
Rhodococcus jostii RHA1	pRHL2	RHA1_RS42585	K23124	2.4e-102	5-oxoprolinase (ATP-hydrolysing) subunit C [EC:3.5.2.9]
Rhodococcus jostii RHA1	pRHL2	RHA1_RS42680	K03710	3.8e-53	GntR family transcriptional regulator
Rhodococcus jostii RHA1	pRHL2	RHA1_RS42690	K16238	2e-186	ethanolamine permease
Rhodococcus jostii RHA1	pRHL2	RHA1_RS42695	K13633	9.5e-114	AraC family transcriptional regulator, transcriptional activator FtrA
Rhodococcus jostii RHA1	pRHL2	RHA1_RS42725	K01470	2e-61	creatinine amidohydrolase [EC:3.5.2.10]
Rhodococcus jostii RHA1	pRHL2	RHA1_RS42730	K03762	1.8e-164	MFS transporter, MHS family, proline/betaine transporter
Rhodococcus jostii RHA1	pRHL3	RHA1_RS42945	K00382	2.1e-158	dihydrolipoamide dehydrogenase [EC:1.8.1.4]
Rhodococcus jostii RHA1	pRHL3	RHA1_RS42955	K07497	1.3e-52	putative transposase
Rhodococcus jostii RHA1	pRHL3	RHA1_RS42955	K07483	1.4e-26	transposase
Rhodococcus jostii RHA1	pRHL3	RHA1_RS42985	K00249	1.1e-117	acyl-CoA dehydrogenase [EC:1.3.8.7]
Rhodococcus jostii RHA1	pRHL3	RHA1_RS43000	K01692	3.8e-70	enoyl-CoA hydratase [EC:4.2.1.17]
Rhodococcus jostii RHA1	pRHL3	RHA1_RS45410	K07483	8.7e-16	transposase
Rhodococcus jostii RHA1	pRHL3	RHA1_RS43025	K14941	7.9e-59	2-phospho-L-lactate/phosphoenolpyruvate guanylyltransferase [EC:2.7.7.68 2.7.7.105]
Rhodococcus jostii RHA1	pRHL3	RHA1_RS43030	K11779	0	FO synthase [EC:2.5.1.147 4.3.1.32]
Rhodococcus jostii RHA1	pRHL3	RHA1_RS43040	K12466	4.7e-116	(+)-trans-carveol dehydrogenase [EC:1.1.1.275]
Rhodococcus jostii RHA1	pRHL3	RHA1_RS43045	K14733	6.3e-159	limonene 1,2-monooxygenase [EC:1.14.13.107]
Rhodococcus jostii RHA1	pRHL3	RHA1_RS43055	K14652	1.7e-130	3,4-dihydroxy 2-butanone 4-phosphate synthase / GTP cyclohydrolase II [EC:4.1.99.12 3.5.4.25]
Rhodococcus jostii RHA1	pRHL3	RHA1_RS43070	K00540	3e-49	F420H(2)-dependent quinone reductase [EC:1.1.98.-]
Rhodococcus jostii RHA1	pRHL3	RHA1_RS43075	K13075	3e-54	N-acyl homoserine lactone hydrolase [EC:3.1.1.81]
Rhodococcus jostii RHA1	pRHL3	RHA1_RS43100	K08282	6e-96	non-specific serine/threonine protein kinase [EC:2.7.11.1]
Rhodococcus jostii RHA1	pRHL3	RHA1_RS43100	K12132	2.8e-81	eukaryotic-like serine/threonine-protein kinase [EC:2.7.11.1]
Rhodococcus jostii RHA1	pRHL3	RHA1_RS43110	K00033	4.9e-102	6-phosphogluconate dehydrogenase [EC:1.1.1.44 1.1.1.343]
Rhodococcus jostii RHA1	pRHL3	RHA1_RS43115	K15510	5.9e-159	coenzyme F420-dependent glucose-6-phosphate dehydrogenase [EC:1.1.98.2]
Rhodococcus jostii RHA1	pRHL3	RHA1_RS43120	K01810	1e-255	glucose-6-phosphate isomerase [EC:5.3.1.9]
Rhodococcus jostii RHA1	pRHL3	RHA1_RS48580	K18955	4.5e-32	WhiB family transcriptional regulator, redox-sensing transcriptional regulator
Rhodococcus jostii RHA1	pRHL3	RHA1_RS43135	K00529	9.6e-149	3-phenylpropionate/trans-cinnamate dioxygenase ferredoxin reductase component [EC:1.18.1.3]
Rhodococcus jostii RHA1	pRHL3	RHA1_RS43135	K18227	3.5e-106	p-cumate 2,3-dioxygenase ferredoxin reductase component [EC:1.18.1.3]
Rhodococcus jostii RHA1	pRHL3	RHA1_RS48615	K02078	2e-16	acyl carrier protein
Rhodococcus jostii RHA1	pRHL3	RHA1_RS43250	K07001	1e-37	NTE family protein
Rhodococcus jostii RHA1	pRHL3	RHA1_RS43275	K22894	3.1e-104	SARP family transcriptional regulator, regulator of embCAB operon
Rhodococcus jostii RHA1	pRHL3	RHA1_RS43285	K21397	0	ABC transport system ATP-binding/permease protein
Rhodococcus jostii RHA1	pRHL3	RHA1_RS43290	K22893	2e-162	serine/threonine kinase PknH [EC:2.7.11.1]
Rhodococcus jostii RHA1	pRHL3	RHA1_RS43290	K08884	5.2e-108	serine/threonine protein kinase, bacterial [EC:2.7.11.1]
Rhodococcus jostii RHA1	pRHL3	RHA1_RS43290	K12132	2.8e-96	eukaryotic-like serine/threonine-protein kinase [EC:2.7.11.1]
Rhodococcus jostii RHA1	pRHL3	RHA1_RS43290	K11912	1.5e-12	serine/threonine-protein kinase PpkA [EC:2.7.11.1]
Rhodococcus jostii RHA1	pRHL3	RHA1_RS43300	K12132	1.5e-95	eukaryotic-like serine/threonine-protein kinase [EC:2.7.11.1]
Rhodococcus jostii RHA1	pRHL3	RHA1_RS43300	K11912	8.7e-19	serine/threonine-protein kinase PpkA [EC:2.7.11.1]
Rhodococcus jostii RHA1	pRHL3	RHA1_RS45265	K07486	7.8e-24	transposase
Rhodococcus jostii RHA1	pRHL3	RHA1_RS43350	K07497	7e-25	putative transposase
Rhodococcus jostii RHA1	pRHL3	RHA1_RS43360	K07494	2.4e-27	putative transposase
Rhodococcus jostii RHA1	pRHL3	RHA1_RS43380	K07486	1.7e-47	transposase
Rhodococcus jostii RHA1	pRHL3	RHA1_RS43490	K01971	1e-74	bifunctional non-homologous end joining protein LigD [EC:6.5.1.1]
Rhodococcus jostii RHA1	pRHL3	RHA1_RS43505	K03427	3.3e-108	type I restriction enzyme M protein [EC:2.1.1.72]
Rhodococcus jostii RHA1	pRHL3	RHA1_RS43510	K01154	4.7e-37	type I restriction enzyme, S subunit [EC:3.1.21.3]
Rhodococcus jostii RHA1	pRHL3	RHA1_RS43515	K01153	2.4e-140	type I restriction enzyme, R subunit [EC:3.1.21.3]
Rhodococcus jostii RHA1	pRHL3	RHA1_RS43530	K07483	1e-17	transposase
Rhodococcus jostii RHA1	pRHL3	RHA1_RS48720	K18955	8.1e-30	WhiB family transcriptional regulator, redox-sensing transcriptional regulator
Rhodococcus jostii RHA1	pRHL3	RHA1_RS43535	K00666	6.4e-178	fatty-acyl-CoA synthase [EC:6.2.1.-]
Rhodococcus jostii RHA1	pRHL3	RHA1_RS43540	K09780	6.5e-18	uncharacterized protein
Rhodococcus jostii RHA1	pRHL3	RHA1_RS43545	K06889	4e-48	uncharacterized protein
Rhodococcus jostii RHA1	pRHL3	RHA1_RS43565	K00784	1.1e-36	ribonuclease Z [EC:3.1.26.11]
Rhodococcus jostii RHA1	pRHL3	RHA1_RS43570	K15510	1.9e-158	coenzyme F420-dependent glucose-6-phosphate dehydrogenase [EC:1.1.98.2]
Rhodococcus jostii RHA1	pRHL3	RHA1_RS43575	K01810	1.2e-264	glucose-6-phosphate isomerase [EC:5.3.1.9]
Rhodococcus jostii RHA1	pRHL3	RHA1_RS43600	K07552	9.4e-126	MFS transporter, DHA1 family, multidrug resistance protein
Rhodococcus jostii RHA1	pRHL3	RHA1_RS43630	K01039	4.9e-57	glutaconate CoA-transferase, subunit A [EC:2.8.3.12]
Rhodococcus jostii RHA1	pRHL3	RHA1_RS43640	K01692	2.3e-69	enoyl-CoA hydratase [EC:4.2.1.17]
Rhodococcus jostii RHA1	pRHL3	RHA1_RS43645	K01692	6.6e-71	enoyl-CoA hydratase [EC:4.2.1.17]
Rhodococcus jostii RHA1	pRHL3	RHA1_RS43650	K00249	1.7e-109	acyl-CoA dehydrogenase [EC:1.3.8.7]
Rhodococcus jostii RHA1	pRHL3	RHA1_RS45305	K07068	1.8e-19	uncharacterized protein
Rhodococcus jostii RHA1	pRHL3	RHA1_RS43660	K00626	3.9e-46	acetyl-CoA C-acetyltransferase [EC:2.3.1.9]
Rhodococcus jostii RHA1	pRHL3	RHA1_RS43685	K01895	2e-303	acetyl-CoA synthetase [EC:6.2.1.1]
Rhodococcus jostii RHA1	pRHL3	RHA1_RS43690	K14060	1.9e-46	putative DNA-invertase from lambdoid prophage Rac
Rhodococcus jostii RHA1	pRHL3	RHA1_RS43715	K09956	4.4e-32	uncharacterized protein
Rhodococcus jostii RHA1	pRHL3	RHA1_RS43725	K22552	3.7e-225	multicopper oxidase [EC:1.16.3.1]
Rhodococcus jostii RHA1	pRHL3	RHA1_RS43730	K08982	4.8e-21	putative membrane protein
Rhodococcus jostii RHA1	pRHL3	RHA1_RS43735	K02483	2e-76	two-component system, OmpR family, response regulator
Rhodococcus jostii RHA1	pRHL3	RHA1_RS43745	K07213	7e-19	copper chaperone
Rhodococcus jostii RHA1	pRHL3	RHA1_RS43750	K08995	3.6e-14	putative membrane protein
Rhodococcus jostii RHA1	pRHL3	RHA1_RS43755	K21600	2.5e-38	CsoR family transcriptional regulator, copper-sensing transcriptional repressor
Rhodococcus jostii RHA1	pRHL3	RHA1_RS43765	K01533	3.6e-286	P-type Cu2+ transporter [EC:7.2.2.9]
Rhodococcus jostii RHA1	pRHL3	RHA1_RS43765	K17686	8e-281	P-type Cu+ transporter [EC:7.2.2.8]
Rhodococcus jostii RHA1	pRHL3	RHA1_RS43780	K07213	4.7e-22	copper chaperone
Rhodococcus jostii RHA1	pRHL3	RHA1_RS43785	K17686	2e-300	P-type Cu+ transporter [EC:7.2.2.8]
Rhodococcus jostii RHA1	pRHL3	RHA1_RS43785	K01533	4.8e-263	P-type Cu2+ transporter [EC:7.2.2.9]
Rhodococcus jostii RHA1	pRHL3	RHA1_RS43810	K01069	1.6e-39	hydroxyacylglutathione hydrolase [EC:3.1.2.6]
Rhodococcus jostii RHA1	pRHL3	RHA1_RS43830	K03593	2.1e-119	ATP-binding protein involved in chromosome partitioning
Rhodococcus jostii RHA1	pRHL3	RHA1_RS43840	K08358	2.5e-79	tetrathionate reductase subunit B
Rhodococcus jostii RHA1	pRHL3	RHA1_RS43845	K04085	3.7e-28	tRNA 2-thiouridine synthesizing protein A [EC:2.8.1.-]
Rhodococcus jostii RHA1	pRHL3	RHA1_RS43855	K01069	2.5e-40	hydroxyacylglutathione hydrolase [EC:3.1.2.6]
Rhodococcus jostii RHA1	pRHL3	RHA1_RS43860	K00389	5.1e-39	putative membrane protein
Rhodococcus jostii RHA1	pRHL3	RHA1_RS43865	K00389	1.3e-13	putative membrane protein
Rhodococcus jostii RHA1	pRHL3	RHA1_RS43870	K22042	1.4e-30	ArsR family transcriptional regulator, virulence genes transcriptional regulator
Rhodococcus jostii RHA1	pRHL3	RHA1_RS43875	K01069	1.6e-49	hydroxyacylglutathione hydrolase [EC:3.1.2.6]
Rhodococcus jostii RHA1	pRHL3	RHA1_RS43880	K03671	1.2e-32	thioredoxin 1
Rhodococcus jostii RHA1	pRHL3	RHA1_RS43890	K01607	3.3e-08	4-carboxymuconolactone decarboxylase [EC:4.1.1.44]
Rhodococcus jostii RHA1	pRHL3	RHA1_RS43900	K06994	1.5e-176	putative drug exporter of the RND superfamily
Rhodococcus jostii RHA1	pRHL3	RHA1_RS43920	K07090	1.3e-45	uncharacterized protein
Rhodococcus jostii RHA1	pRHL3	RHA1_RS43925	K01069	9.7e-44	hydroxyacylglutathione hydrolase [EC:3.1.2.6]
Rhodococcus jostii RHA1	pRHL3	RHA1_RS44005	K03496	7.8e-57	chromosome partitioning protein
Rhodococcus jostii RHA1	pRHL3	RHA1_RS44050	K07493	2.4e-124	putative transposase
Rhodococcus jostii RHA1	pRHL3	RHA1_RS44060	K06190	3.6e-51	intracellular septation protein
Rhodococcus jostii RHA1	pRHL3	RHA1_RS44100	K07497	3.8e-19	putative transposase
Rhodococcus jostii RHA1	pRHL3	RHA1_RS44140	K03466	5.9e-24	DNA segregation ATPase FtsK/SpoIIIE, S-DNA-T family
Rhodococcus jostii RHA1	pRHL3	RHA1_RS44170	K01458	2.6e-42	N-formylglutamate deformylase [EC:3.5.1.68]
Rhodococcus jostii RHA1	pRHL3	RHA1_RS48850	K12132	3e-72	eukaryotic-like serine/threonine-protein kinase [EC:2.7.11.1]
Rhodococcus jostii RHA1	pRHL3	RHA1_RS44225	K00217	6e-143	maleylacetate reductase [EC:1.3.1.32]
Rhodococcus jostii RHA1	pRHL3	RHA1_RS44230	K04098	3.9e-122	hydroxyquinol 1,2-dioxygenase [EC:1.13.11.37]
Rhodococcus jostii RHA1	pRHL3	RHA1_RS44250	K04033	5.9e-42	AraC family transcriptional regulator, ethanolamine operon transcriptional activator
Rhodococcus jostii RHA1	pRHL3	RHA1_RS48855	K18955	1.1e-26	WhiB family transcriptional regulator, redox-sensing transcriptional regulator
Rhodococcus jostii RHA1	pRHL3	RHA1_RS44255	K00027	2e-161	malate dehydrogenase (oxaloacetate-decarboxylating) [EC:1.1.1.38]
Rhodococcus jostii RHA1	pRHL3	RHA1_RS44260	K04033	7.6e-46	AraC family transcriptional regulator, ethanolamine operon transcriptional activator
Rhodococcus jostii RHA1	pRHL3	RHA1_RS44305	K00435	4.3e-87	hydrogen peroxide-dependent heme synthase [EC:1.3.98.5]
Rhodococcus jostii RHA1	pRHL3	RHA1_RS44310	K01810	8.2e-262	glucose-6-phosphate isomerase [EC:5.3.1.9]
Rhodococcus jostii RHA1	pRHL3	RHA1_RS44315	K00033	2.5e-103	6-phosphogluconate dehydrogenase [EC:1.1.1.44 1.1.1.343]
Rhodococcus jostii RHA1	pRHL3	RHA1_RS44320	K08093	7.5e-73	3-hexulose-6-phosphate synthase [EC:4.1.2.43]
Rhodococcus jostii RHA1	pRHL3	RHA1_RS44325	K08094	1.8e-72	6-phospho-3-hexuloisomerase [EC:5.3.1.27]
Rhodococcus jostii RHA1	pRHL3	RHA1_RS44335	K00036	5.9e-174	glucose-6-phosphate 1-dehydrogenase [EC:1.1.1.49 1.1.1.363]
